# Supplementary material for: Recognizing drug targets using evolutionary information: implications for repurposing FDA-approved drugs against Mycobacterium tuberculosis H37Rv
Source: Royal Society of Chemistry journal article supplement (doi:10.1039/c5mb00476d), 2015-09-22
Supplement: c5mb00476d1.xlsx [file c5mb00476d1.xlsx]

## Sheet: Sheet1
Supplementary Table 1: List of known targets with information on bound ligands as retrieved from PDB
UniProt ID	Protein_description	Length	PDB_code:Chain	Resolution_of_crystal_structure	Structural_region	Ligand(s)	Source organism
O24990	Enoyl-[acyl-carrier-protein] reductase [NADH] FabI	275	2PD3:A	2.50	1-275	NICOTINAMIDE-ADENINE-DINUCLEOTIDE;TRICLOSAN	Helicobacter pylori (strain ATCC 700392 / 26695)
O25608	Oxygen-insensitive NADPH nitroreductase	210	3QDL:A	2.00	1-210	FLAVIN MONONUCLEOTIDE	Helicobacter pylori (strain ATCC 700392 / 26695)
O67854	Transporter	513	2QEI:A	1.85	1-513	CLOMIPRAMINE	Aquifex aeolicus (strain VF5)
P00363	Fumarate reductase flavoprotein subunit	602	1KF6:A	2.70	1-602	2-HEPTYL-4-HYDROXY QUINOLINE N-OXIDE;FLAVIN-ADENINE DINUCLEOTIDE;OXALOACETATE ION;ACETATE ION;FE3-S4 CLUSTER;FE2/S2 (INORGANIC) CLUSTER;IRON/SULFUR CLUSTER	Escherichia coli (strain K12)
P00484	Chloramphenicol acetyltransferase 3	213	1QCA:A	2.20	1-213	FUSIDIC ACID	Escherichia coli
P00582	DNA polymerase I	928	1KFD:A	3.90	324-928	CYTIDINE-5'-TRIPHOSPHATE	Escherichia coli (strain K12)
P00807	Beta-lactamase	281	1BLC:A	2.20	25-281	N-(1-CARBOXY-2-HYDROXY-4-OXO-BUTYL)-N-(3- OXO-CISPROPENYL)AMINE;N-(2-HYDROXY-4-OXO-BUTYL)-N-(3-OXO-TRANSPROPENYL)AMINE	Staphylococcus aureus
P00811	Beta-lactamase	377	1I5Q:A	1.83	20-377	MOXALACTAM	Escherichia coli (strain K12)
P02359	30S ribosomal protein S7	179	4U24:AG	2.90	2-152	DALFOPRISTIN	Escherichia coli (strain K12)
P02919	Penicillin-binding protein 1B	844	3VMA:A	2.16	58-804	MOENOMYCIN	Escherichia coli (strain K12)
P03176	Thymidine kinase	376	1KI2:A	2.20	46-376	GANCICLOVIR	Human herpesvirus 1 (strain 17)
P05193	Beta-lactamase	381	1RGY:A	1.52	22-381	(4S)-2-METHYL-2,4-PENTANEDIOL;{[(2E)-2-(2-AMINO-1,3-THIAZOL-4-YL)-2-(METHOXYIMINO)ETHANOYL]AMINO}METHYLPHOSPHONIC ACID	Citrobacter freundii
P05193	Beta-lactamase	381	1RGY:A	1.52	22-381	CEFOTAXIME	Citrobacter freundii
P07003	Pyruvate dehydrogenase [ubiquinone]	572	3EY9:A	2.90	1-572	FLAVIN-ADENINE DINUCLEOTIDE;THIAMIN DIPHOSPHATE	Escherichia coli (strain K12)
P08192	Bifunctional protein FolC	422	1W78:A	1.82	1-422	ADENOSINE-5'-DIPHOSPHATE;PHOSPHORYLATED DIHYDROPTEROATE	Escherichia coli (strain K12)
P08506	D-alanyl-D-alanine carboxypeptidase DacC	400	3ITA:A	1.80	28-378	AMPICILLIN	Escherichia coli (strain K12)
P0A0K8	DNA gyrase subunit B	644	4PLB:B	2.69	410-543,580-644	AM8191: 6-[({(1r,4S)-1-[(1S)-2-(3-fluoro-6-methoxy- 1,5-naphthyridin-4-yl)-1-hydroxyethyl]-2- oxabicyclo[2.2.2]oct-4-yl}amino)methyl]-2H- pyrido[3,2-b][1,4]oxazin-3(4H)-one	Staphylococcus aureus
P0A0K8	DNA gyrase subunit B	644	4URO:A	2.59	1-231	NOVOBIOCIN	Staphylococcus aureus
P0A749	UDP-N-acetylglucosamine 1-carboxyvinyltransferase	419	1UAE:A	1.80	1-419	URIDINE-DIPHOSPHATE-N-ACETYLGLUCOSAMINE;FOSFOMYCIN	Escherichia coli (strain K12)
P0A7R5	30S ribosomal protein S10	103	4U24:AJ	2.90	5-102	DALFOPRISTIN	Escherichia coli (strain K12)
P0A7S3	30S ribosomal protein S12	124	4V52:AL	3.21	2-124	NEOMYCIN	Escherichia coli (strain K12)
P0A7S9	30S ribosomal protein S13	118	4U24:AM	2.90	2-115	DALFOPRISTIN	Escherichia coli (strain K12)
P0A7U3	30S ribosomal protein S19	92	4U24:AS	2.90	3-81	DALFOPRISTIN	Escherichia coli (strain K12)
P0A7V3	30S ribosomal protein S3	233	4U24:AC	2.90	2-207	DALFOPRISTIN	Escherichia coli (strain K12)
P0A7V8	30S ribosomal protein S4	206	4U24:AD	2.90	2-206	DALFOPRISTIN	Escherichia coli (strain K12)
P0A7W7	30S ribosomal protein S8	130	4U24:AH	2.90	2-130	DALFOPRISTIN	Escherichia coli (strain K12)
P0A7X3	30S ribosomal protein S9	130	4U24:AI	2.90	4-130	DALFOPRISTIN	Escherichia coli (strain K12)
P0AC13	Dihydropteroate synthase	282	1AJ0:A	2.00	1-282	2-AMINO-6-HYDROXYMETHYL-7,8-DIHYDRO-3H-PTERIDIN- 4-ONE;SULFANILAMIDE	Escherichia coli (strain K12)
P0ADY7	50S ribosomal protein L16	136	4V7T:BM	3.19	1-136	CHLORAMPHENICOL	Escherichia coli (strain K12)
P0AEB2	D-alanyl-D-alanine carboxypeptidase DacA	403	3MZE:A	2.10	30-386	CEFOXITIN	Escherichia coli (strain K12)
P0AEK4	Enoyl-[acyl-carrier-protein] reductase [NADH] FabI	262	1QG6:A	1.90	2-262	NICOTINAMIDE-ADENINE-DINUCLEOTIDE;TRICLOSAN	Escherichia coli (strain K12)
P0AES6	DNA gyrase subunit B	804	1AJ6:A	2.30	2-220	NOVOBIOCIN	Escherichia coli (strain K12)
P0AG59	30S ribosomal protein S14	101	4U24:AN	2.90	2-101	DALFOPRISTIN	Escherichia coli (strain K12)
P12256	Penicillin acylase	338	2Z71:A	2.60	4-338	(2S,5R,6R)-3,3-DIMETHYL-7-OXO-6-(2-PHENOXYACETAMIDO)- 4-THIA-1- AZABICYCLO(3.2.0)HEPTANE-2-CARBOXYLIC ACID	Lysinibacillus sphaericus
P13922	Bifunctional dihydrofolate reductase-thymidylate synthase	608	1J3I:A,1J3I:C	2.30	1-280,281-608	NADPH DIHYDRO-NICOTINAMIDE-ADENINE-DINUCLEOTIDE PHOSPHATE;2'-DEOXYURIDINE 5'-MONOPHOSPHATE;6,6-DIMETHYL-1-[3-(2,4,5-TRICHLOROPHENOXY)PROPOXY]- 1,6-DIHYDRO-1,3,5-TRIAZINE-2,4-DIAMINE	Plasmodium falciparum (isolate K1 / Thailand)
P13922	Bifunctional dihydrofolate reductase-thymidylate synthase	608	3DGA:A,3DGA:C	2.70	1-280,281-608	NADPH DIHYDRO-NICOTINAMIDE-ADENINE-DINUCLEOTIDE PHOSPHATE;N-[2-CHLORO-5-(TRIFLUOROMETHYL)PHENYL]IMIDODICARBONIMIDIC DIAMIDE;2'-DEOXYURIDINE 5'-MONOPHOSPHATE	Plasmodium falciparum (isolate K1 / Thailand)
P14677	Penicillin-binding protein 2x	750	1QMF:A	2.80	49-750	2-[CARBOXY-(2-FURAN-2-YL-2-METHOXYIMINO-ACETYLAMINO)-METHYL]-5-METHYL-3,6-DIHYDRO-2H-[1,3]THIAZINE- 4-CARBOXYLIC ACID;CEFUROXIME (OCT-3-ENE FORM)	Streptococcus pneumoniae serotype 4 (strain ATCC BAA-334 / TIGR4)
P15555	D-alanyl-D-alanine carboxypeptidase	406	1CEG:A	1.80	32-380	CEPHALOTHIN	Streptomyces sp. (strain R61)
P17117	Oxygen-insensitive NADPH nitroreductase	240	1F5V:A	1.70	1-240	FLAVIN MONONUCLEOTIDE	Escherichia coli (strain K12)
P18314	Urease subunit alpha	567	1FWE:C	2.00	1-567	ACETOHYDROXAMIC ACID	Enterobacter aerogenes
P24093	Dr hemagglutinin structural subunit	160	1USQ:A	1.90	21-160	CHLORAMPHENICOL	Escherichia coli
P24228	D-alanyl-D-alanine carboxypeptidase DacB	477	2EX9:A	1.65	21-477	PENICILLIN-V	Escherichia coli (strain K12)
P27907	Neuraminidase	465	1A4G:A	2.20	76-465	ZANAMIVIR	Influenza B virus (strain B/Beijing/1/1987)
P29166	Iron hydrogenase 1	574	1C4A:A	2.40	1-574	FE2/S2 (INORGANIC) CLUSTER;2 IRON/2 SULFUR/5 CARBONYL/2 WATER INORGANIC CLUSTER;IRON/SULFUR CLUSTER	Clostridium pasteurianum
P33673	Chitosanase	301	1QGI:A	1.60	43-301	N-ACETYL-D-GLUCOSAMINE;D-GLUCOSAMINE	Bacillus circulans
P41972	Isoleucine--tRNA ligase	917	1FFY:A	2.20	1-917	MUPIROCIN	Staphylococcus aureus
P46925	Plasmepsin-2	453	2BJU:A	1.56	1-453	N-(R-CARBOXY-ETHYL)-ALPHA-(S)-(2-PHENYLETHYL)	Plasmodium falciparum
P49228	50S ribosomal protein L32	60	1OND:Z	3.40	1-60	TROLEANDOMYCIN	Deinococcus radiodurans
P50870	Streptogramin A acetyltransferase	209	1MRL:A	2.80	1-209	DALFOPRISTIN	Enterococcus faecium
P53848	Folic acid synthesis protein FOL1	824	2BMB:A	2.30	297-824	PTERIN-6-YL-METHYL-MONOPHOSPHATE	Saccharomyces cerevisiae (strain ATCC 204508 / S288c)
P60723	50S ribosomal protein L4	201	4V52:BE	3.21	1-201	NEOMYCIN	Escherichia coli (strain K12)
P61889	Malate dehydrogenase	312	1EMD:A	1.90	1-312	NICOTINAMIDE-ADENINE-DINUCLEOTIDE;CITRIC ACID	Escherichia coli (strain K12)
P68638	Complement control protein C3	263	1Y8E:A	2.20	20-263	SURAMIN	Vaccinia virus (strain Western Reserve)
P72525	DNA topoisomerase 4 subunit A	823	3RAE:A	2.90	1-488	LEVOFLOXACIN	Streptococcus pneumoniae serotype 4 (strain ATCC BAA-334 / TIGR4)
P94692	Pyruvate synthase	1232	2C42:A	1.78	2-1232	THIAMINE DIPHOSPHATE;PYRUVIC ACID;IRON/SULFUR CLUSTER	Desulfovibrio africanus
P96558	dTDP-epi-vancosaminyltransferase	396	1PNV:A	2.80	1-396	THYMIDINE-5'-DIPHOSPHATE;VANCOMYCIN;(1R,3S,4S,5S)-3-AMINO-2,3,6-TRIDEOXY-3-METHYL-ALPHA-L-ARABINO-HEXOPYRANOSE	Amycolatopsis orientalis (Nocardia orientalis)
P9WGR1	Enoyl-[acyl-carrier-protein] reductase [NADH]	269	1BVR:A	2.80	2-269	NICOTINAMIDE-ADENINE-DINUCLEOTIDE;TRANS-2-HEXADECENOYL-(N-ACETYL-CYSTEAMINE)- THIOESTER	Mycobacterium tuberculosis (strain ATCC 25618 / H37Rv)
P9WGR1	Enoyl-[acyl-carrier-protein] reductase [NADH]	269	1P45:A	2.60	1-269	NICOTINAMIDE-ADENINE-DINUCLEOTIDE;TRICLOSAN	Mycobacterium tuberculosis (strain ATCC 25618 / H37Rv)
P9WIE5	Catalase-peroxidase	740	4C50:A	2.50	1-740	PROTOPORPHYRIN IX CONTAINING FE;ALPHA-D-GLUCOSE;ACETATE ION	Mycobacterium tuberculosis (strain ATCC 25618 / H37Rv)
Q04707	Penicillin-binding protein 1A	719	2ZC5:A,2ZC5:B	3.00	47-70,264-653	BIAPENEM	Streptococcus pneumoniae serotype 4 (strain ATCC BAA-334 / TIGR4)
Q07806	Penicillin-binding protein 1A	821	4OON:A	3.20	36-822	(4Z,8S,11E,14S)-5-(2-amino-1,3-thiazol-4- yl)-14-(5,6-dihydroxy-1,3-dioxo-1,3-dihydro- 2H-isoindol-2-yl)-8-formyl-2-methyl-6-oxo- 3,10-dioxa-4,7,11-triazatetradeca-4,11-diene- 2,12,14-tricarboxylic acid	Pseudomonas aeruginosa (strain ATCC 15692 / PAO1 / 1C / PRS 101 / LMG 12228)
Q08210	Dihydroorotate dehydrogenase (quinone), mitochondrial	569	4CQA:A	2.82	158-569	2-(4-chlorobenzyl)-8-ethoxy-1,3-dimethylcyclohepta[c]pyrrol- 4(2H)-one	Plasmodium falciparum (isolate 3D7)
Q51504	Penicillin-binding protein 3	579	3OCN:A	2.61	35-579	CEFTAZIDIME	Pseudomonas aeruginosa
Q58L87	TetR family transcriptional repressor LfrR	189	2V57:A	1.90	1-189	PROFLAVIN	Mycobacterium smegmatis
Q59961	DNA topoisomerase 4 subunit B	647	3RAE:C	2.90	1-488	LEVOFLOXACIN	Streptococcus pneumoniae serotype 4 (strain ATCC BAA-334 / TIGR4)
Q5SHN5	Elongation factor G	691	4V5F:AY	3.60	1-691	FUSIDIC ACID;GUANOSINE-5'-DIPHOSPHATE	Thermus thermophilus
Q5SHN7	30S ribosomal protein S10	105	1FJG:J	3.00	1-105	PAROMOMYCIN;SPECTINOMYCIN;STREPTOMYCIN	Thermus thermophilus (strain HB8 / ATCC 27634 / DSM 579)
Q6GI75	Enoyl-[acyl-carrier-protein] reductase [NADPH] FabI	256	3GR6:A	2.28	1-256	NICOTINAMIDE-ADENINE-DINUCLEOTIDE PHOSPHATE;TRICLOSAN	Staphylococcus aureus (strain MRSA252)
Q7CRA4	Penicillin-binding protein 1b	821	2XD1:A	3.00	101-791	CEFOTAXIME	Streptococcus pneumoniae (strain ATCC BAA-255 / R6)
Q89ZI2	O-GlcNAcase BT_4395	737	2W4X:A	2.42	22-737	STREPTOZOTOCIN	Bacteroides thetaiotaomicron
Q8DR59	Penicillin-binding protein 1A	719	2C5W:A,2C5W:B	2.55	51-66,266-650	CEFOTAXIME	Streptococcus pneumoniae (strain ATCC BAA-255 / R6)
Q8MU52	Glutathione S-transferase	211	1Q4J:A	2.20	1-211	S-HEXYLGLUTATHIONE	Plasmodium falciparum
Q91RS4	NS3 protease	181	2XCN:A	3.02	1-180	N-[(CYCLOPENTYLOXY)CARBONYL]-3-METHYL-L-VALYL- (4R)-N-{(1R)-3-HYDROXY-1-[HYDROXY(OXIDO)BORANYL]PROPYL}- 4-(ISOQUINOLIN-1-YLOXY)-L-PROLINAMIDE	Hepatitis C virus
