# Supplementary material for: Recognizing drug targets using evolutionary information: implications for repurposing FDA-approved drugs against Mycobacterium tuberculosis H37Rv
Source: Royal Society of Chemistry journal article supplement (doi:10.1039/c5mb00476d), 2015-09-22
Supplement: c5mb00476d2.xlsx [file c5mb00476d2.xlsx]

## Sheet: Supp 2
Supplementary Table 2: List of approved drugs and their corresponding drug classes predicted as potential candidates for repurposing.
DrugBank ID	Drug description	Drug class	Evidence on anti-tubercular activity, if available in literature	Predicted target for the drug
DB06729	Sulfaphenazole	Azoles	-	Rv1207,Rv3608c
DB08933	Luliconazole	Azoles	-	Rv0136,Rv0327c,Rv0568,Rv0764c,Rv1666c,Rv3059
DB00698	Nitrofurantoin*	Azolidines	In vitro study120	Rv0306,Rv0700
DB00196	Fluconazole*	Benzene and substituted derivatives	Crystal structure of cyp121-fluconazole complex121	Rv0136,Rv0327c,Rv0568,Rv0764c,Rv1666c,Rv3059
DB00250	Dapsone*	Benzene and substituted derivatives	Clinical report122, in vitro study123	Rv1207,Rv3608c
DB00259	Sulfanilamide*	Benzene and substituted derivatives	In vitro study124	Rv1207,Rv3608c
DB00263	Sulfisoxazole*	Benzene and substituted derivatives	In vitro study125	Rv1207,Rv3608c
DB00576	Sulfamethizole	Benzene and substituted derivatives	-	Rv1207,Rv3608c
DB00582	Voriconazole	Benzene and substituted derivatives	-	Rv0136,Rv0327c,Rv0568,Rv0764c,Rv1666c,Rv3059
DB00634	Sulfacetamide	Benzene and substituted derivatives	-	Rv1207,Rv3608c
DB01015	Sulfamethoxazole*	Benzene and substituted derivatives	In vitro studies82,126	Rv1207,Rv2447c,Rv3608c
DB01110	Miconazole*	Benzene and substituted derivatives	Biochemical study with cyp144127	Rv0136,Rv0327c,Rv0568,Rv0764c,Rv1666c,Rv3059
DB01298	Sulfacytine	Benzene and substituted derivatives	-	Rv1207,Rv3608c
DB01299	Sulfadoxine*	Benzene and substituted derivatives	Clinical study in combination with pyrimethamine and isoniazid79	Rv2764c
DB01581	Sulfamerazine	Benzene and substituted derivatives	-	Rv1207,Rv3608c
DB01582	Sulfamethazine	Benzene and substituted derivatives	-	Rv1207,Rv3608c
DB04794	Bifonazole	Benzene and substituted derivatives	-	Rv0136,Rv0327c,Rv0568,Rv0764c,Rv1666c,Rv3059
DB08604	Triclosan*	Benzene and substituted derivatives	Inhibits enoyl reductase inhA83	Rv0242c,Rv0547c,Rv0687,Rv0765c,Rv0769,Rv0927c,Rv0945,Rv1050,Rv1350,Rv1483,Rv1543,Rv1714,Rv1928c,Rv1941,Rv2002,Rv2766c,Rv2857c,Rv3530c,Rv3559c
DB00730	Thiabendazole	Benzimidazoles	-	Rv0248c,Rv1552,Rv1595,Rv3318
DB01153	Sertaconazole	Benzothiophenes	-	Rv0136,Rv0327c,Rv0568,Rv0764c,Rv1666c,Rv3059
DB00452	Framycetin*	Carbohydrates and carbohydrate conjugates	In vitro study128	Rv0682
DB00684	Tobramycin*	Carbohydrates and carbohydrate conjugates	Study on clinical isolates129	Rv0682
DB00798	Gentamicin*	Carbohydrates and carbohydrate conjugates	In vitro and in vivo studies130	Rv0682
DB00955	Netilmicin*	Carbohydrates and carbohydrate conjugates	In vitro study131	Rv0682
DB00994	Neomycin*	Carbohydrates and carbohydrate conjugates	Clinical report132; in vitro study133	Rv0682
DB01421	Paromomycin*	Carbohydrates and carbohydrate conjugates	In vivo study134	Rv0700
DB06696	Arbekacin*	Carbohydrates and carbohydrate conjugates	In vitro study135	Rv0682
DB00446	Chloramphenicol*	Carboxylic acids and derivatives	In vitro study136	Rv0708
DB00512	Vancomycin*	Carboxylic acids and derivatives	In vitro study137	Rv1526c
DB00551	Acetohydroxamic Acid	Carboxylic acids and derivatives	-	Rv1850
DB00567	Cephalexin*	Carboxylic acids and derivatives	Targeted disruption of cell divison protein138	Rv0050,Rv2163c,Rv2864c,Rv2911,Rv3330,Rv3682
DB00766	Clavulanate*	Carboxylic acids and derivatives	In vitro and in vivo studies on synergistic meropenem-clavulanate139,140	Rv2068c,Rv2911
DB01163	Amdinocillin	Carboxylic acids and derivatives	-	Rv0016c,Rv0050,Rv2163c,Rv2864c,Rv2911,Rv3330,Rv3682
DB01190	Clindamycin*	Carboxylic acids and derivatives	In vitro study in combination with poloxamer surfactant141; Clinical study142	Rv0651
DB01369	Quinupristin	Carboxylic acids and derivatives	-	Rv0651,Rv0706
DB01605	Pivmecillinam	Carboxylic acids and derivatives	-	Rv0050,Rv3682
DB01606	Tazobactam*	Carboxylic acids and derivatives	In vitro study143	Rv2068c,Rv2911
DB01627	Lincomycin	Carboxylic acids and derivatives	-	Rv0651
DB01051	Novobiocin*	Coumarins and derivatives	In vitro study144	Rv0005
DB00919	Spectinomycin*	Cyclohexylamines	In vitro study on synergistic effect of the drug with other drugs145	Rv0682
DB00251	Terconazole	Diazinanes	-	Rv0136,Rv0327c,Rv0568,Rv0764c,Rv1666c,Rv3059
DB01026	Ketoconazole*	Diazinanes	In vitro and in vivo study in combination with other anti-tuberculars146	Rv0136,Rv0327c,Rv0568,Rv0764c,Rv1666c,Rv3059
DB01167	Itraconazole	Diazinanes	-	Rv0327c,Rv0568,Rv0764c,Rv1666c,Rv3059
DB01263	Posaconazole	Diazinanes	-	Rv0136,Rv0327c,Rv0568,Rv0764c,Rv1666c,Rv3059
DB00410	Mupirocin	Fatty Acyls	-	Rv1536
DB00336	Nitrofural*	Furans	In vitro study[synergistic effect with (4-hydroxyphenyl)-2-phenylpyrazolidine-3,5-dione]147	Rv0118c,Rv1240,Rv1820,Rv3003c,Rv3470c
DB00229	Cefotiam	Lactams	-	Rv0050,Rv3682
DB00267	Cefmenoxime	Lactams	-	Rv0050,Rv2163c,Rv3682
DB00274	Cefmetazole	Lactams	-	Rv0016c,Rv0050,Rv2163c,Rv2864c,Rv2911,Rv3330,Rv3682
DB00301	Flucloxacillin	Lactams	-	Rv0050,Rv3682
DB00303	Ertapenem*	Lactams	Inhibition studies and crystal structure of blaC-ertapenem complex148	Rv0016c,Rv0050,Rv2163c,Rv2864c,Rv2911,Rv3330
DB00319	Piperacillin*	Lactams	In vitro study149	Rv0050,Rv2163c,Rv2864c,Rv2911,Rv3330,Rv3682
DB00355	Aztreonam*	Lactams	In vitro study150	Rv1730c,Rv1922,Rv2163c
DB00415	Ampicillin*	Lactams	In vitro study150,151	Rv0050,Rv2163c,Rv2864c,Rv2911,Rv3330,Rv3682
DB00417	Penicillin V	Lactams	-	Rv0050,Rv2163c,Rv3682
DB00430	Cefpiramide	Lactams	-	Rv0016c,Rv0050,Rv2163c,Rv2864c,Rv2911,Rv3330,Rv3682
DB00438	Ceftazidime*	Lactams	In vitro study152	Rv0016c,Rv0050,Rv2163c,Rv2864c,Rv2911,Rv3330,Rv3682
DB00447	Loracarbef	Lactams	-	Rv2911
DB00456	Cefalotin*	Lactams	In vitro study150,153	Rv0050,Rv0399c,Rv0907,Rv1730c,Rv1922,Rv2163c,Rv2864c,Rv2911,Rv3330,Rv3682
DB00485	Dicloxacillin*	Lactams	In vivo study154	Rv0050,Rv2163c,Rv2864c,Rv2911,Rv3330,Rv3682
DB00493	Cefotaxime*	Lactams	In vitro studies153,155	Rv0050,Rv2163c,Rv2864c,Rv3682
DB00535	Cefdinir	Lactams	-	Rv0016c,Rv2163c
DB00607	Nafcillin	Lactams	-	Rv0050,Rv2163c,Rv2864c,Rv2911,Rv3330,Rv3682
DB00671	Cefixime*	Lactams	In vitro study150	Rv0016c,Rv0050,Rv2163c
DB00689	Cephaloglycin	Lactams	-	Rv0016c
DB00713	Oxacillin*	Lactams	In vitro studies150,156	Rv0050,Rv2163c,Rv2864c,Rv2911,Rv3330,Rv3682
DB00833	Cefaclor	Lactams	-	Rv0050,Rv2911,Rv3330,Rv3682
DB00923	Ceforanide*	Lactams	In vitro studies155,157	Rv0016c,Rv0050,Rv2163c,Rv2864c
DB00948	Mezlocillin	Lactams	-	Rv0016c,Rv0050,Rv2163c,Rv2864c,Rv2911,Rv3330,Rv3682
DB01000	Cyclacillin	Lactams	-	Rv0016c,Rv0050,Rv2163c,Rv2864c,Rv2911,Rv3330,Rv3682
DB01053	Benzylpenicillin	Lactams	-	Rv0016c,Rv2163c
DB01060	Amoxicillin*	Lactams	Clinical report in combination with Clavulanate158	Rv0050,Rv3682
DB01061	Azlocillin	Lactams	-	Rv0050,Rv3682
DB01066	Cefditoren	Lactams	-	Rv0050,Rv2163c,Rv2864c,Rv3682
DB01112	Cefuroxime	Lactams	-	Rv0050,Rv3682
DB01139	Cefapirin*	Lactams	In vitro studies155,159	Rv0050,Rv3682
DB01140	Cefadroxil*	Lactams	In vitro study160	Rv0050,Rv2163c,Rv2864c,Rv2911,Rv3330,Rv3682
DB01147	Cloxacillin	Lactams	-	Rv0016c,Rv0050,Rv1730c,Rv1922,Rv2163c,Rv2864c,Rv2911,Rv3330,Rv3682
DB01150	Cefprozil	Lactams	-	Rv0050,Rv2163c,Rv2864c,Rv3682
DB01212	Ceftriaxone*	Lactams	In vitro study150	Rv2163c,Rv2864c
DB01326	Cefamandole*	Lactams	In vitro study159; crystal structure of blaC mutant-cefamandole148	Rv0016c,Rv0050,Rv2163c,Rv2864c
DB01327	Cefazolin*	Lactams	In vitro study in combination with clavulanic acid161	Rv0016c,Rv0050,Rv2163c,Rv2864c,Rv3682
DB01328	Cefonicid	Lactams	-	Rv0016c,Rv0050,Rv2163c,Rv2864c
DB01329	Cefoperazone*	Lactams	In vitro study162; Clinical report in combination with sulbactam163	Rv0016c,Rv0050,Rv2163c,Rv2864c,Rv2911,Rv3330,Rv3682
DB01330	Cefotetan	Lactams	-	Rv2911,Rv3330
DB01331	Cefoxitin*	Lactams	In vitro study164	Rv0050,Rv2163c,Rv2864c,Rv2911,Rv3330,Rv3682
DB01332	Ceftizoxime*	Lactams	In vitro study159	Rv0050,Rv2163c
DB01413	Cefepime*	Lactams	In vitro study in combination with ethambutol165	Rv0016c,Rv0050,Rv2163c,Rv2864c
DB01414	Cefacetrile	Lactams	-	Rv0050
DB01415	Ceftibuten	Lactams	-	Rv0016c,Rv0050,Rv2163c,Rv2864c
DB01416	Cefpodoxime*	Lactams	In vitro study166	Rv2163c
DB01598	Imipenem*	Lactams	In vivo and clinical study167; in vitro study168	Rv0016c,Rv0050,Rv2068c,Rv2163c,Rv2864c,Rv2911
DB01602	Bacampicillin	Lactams	-	Rv0050,Rv3682
DB01603	Meticillin	Lactams	-	Rv0050,Rv2163c,Rv2864c,Rv2911,Rv3330,Rv3682
DB01604	Pivampicillin	Lactams	-	Rv0050,Rv3682
DB01607	Ticarcillin*	Lactams	In vitro study in combination with clavulanic acid169	Rv0016c,Rv0050,Rv2163c,Rv2864c,Rv3682
DB08795	Azidocillin	Lactams	-	Rv0050,Rv2163c,Rv2864c,Rv2911,Rv3330,Rv3682
DB00207	Azithromycin*	Macrolides and analogues	Clinal report170	Rv0702,Rv0706
DB00778	Roxithromycin*	Macrolides and analogues	In vitro study171	Rv0651
DB01211	Clarithromycin*	Macrolides and analogues	In vitro studies in combination with other drugs129,172,173	Rv0651
DB01321	Josamycin	Macrolides and analogues	-	Rv0702
DB01361	Troleandomycin	Macrolides and analogues	-	Rv0702
DB01764	Dalfopristin	Macrolides and analogues	-	Rv3034c
DB08874	Fidaxomicin*	Macrolides and analogues	In vitro study80	Rv2703
DB01117	Atovaquone*	Naphthalenes	In vitro study174	Rv2139
DB00467	Enoxacin*	Naphthyridines	In vitro study175,176	Rv0006
DB00845	Clofazimine*	Naphthyridines	Clinical report177	Rv0892,Rv1393c
DB01155	Gemifloxacin*	Naphthyridines	In vitro study178	Rv0006
DB00218	Moxifloxacin*	Quinolines and derivatives	In vitro study179,180; clinical report181	Rv0006
DB00487	Pefloxacin*	Quinolines and derivatives	In vitro and in vivo studies182	Rv0006
DB00537	Ciprofloxacin*	Quinolines and derivatives	Study on clinical isolates183	Rv0006
DB00817	Rosoxacin	Quinolines and derivatives	-	Rv0006
DB00978	Lomefloxacin*	Quinolines and derivatives	In vitro studies184,185	Rv0006
DB01044	Gatifloxacin*	Quinolines and derivatives	In vitro and in vivo study186; clinical report187	Rv0006
DB01059	Norfloxacin*	Quinolines and derivatives	In vitro study188	Rv0006
DB01137	Levofloxacin*	Quinolines and derivatives	In vitro studies on clinical isolates180,189; clinical reports in combination with other fluoroquinolones190,191	Rv0006
DB01165	Ofloxacin*	Quinolines and derivatives	In vitro and in vivo study192; synergisitc effect in combination with other antituberculous drugs193	Rv0006
DB01208	Sparfloxacin*	Quinolines and derivatives	Clinical study194	Rv0006
DB04576	Fleroxacin*	Quinolines and derivatives	In vitro studies176,195	Rv0006
DB06771	Besifloxacin	Quinolines and derivatives	-	Rv0006
DB02703	Fusidic Acid*	Steroids and steroid derivatives	In vitro study88	Rv0120c,Rv0684
DB00254	Doxycycline*	Tetracyclines	Clinical report196	Rv3442c,Rv3458c
DB00256	Lymecycline	Tetracyclines	-	Rv3442c,Rv3458c
DB00453	Clomocycline	Tetracyclines	-	Rv3442c,Rv3458c
DB00560	Tigecycline*	Tetracyclines	In vitro study197	Rv0682,Rv0705,Rv2056c,Rv3442c,Rv3460c
DB00595	Oxytetracycline*	Tetracyclines	In vitro study on synergistic effect of the drug with other anti-tuberculars198	Rv3442c,Rv3458c
DB00618	Demeclocycline	Tetracyclines	-	Rv3442c,Rv3458c
DB00759	Tetracycline*	Tetracyclines	Pathogen is resistant to tetracycline. However, synergistic effect of this drug in combination with other drugs can be explored199	Rv0683,Rv0705,Rv0707,Rv0718,Rv2056c
DB01017	Minocycline*	Tetracyclines	In vitro study200; clinical report201	Rv3442c,Rv3458c
DB01301	Rolitetracycline	Tetracyclines	-	Rv3442c
*Experimentally investigated earlier for their anti-tubercular activity
