# Supplementary material for: Recognizing drug targets using evolutionary information: implications for repurposing FDA-approved drugs against Mycobacterium tuberculosis H37Rv
Source: Royal Society of Chemistry journal article supplement (doi:10.1039/c5mb00476d), 2015-09-22
Supplement: c5mb00476d3.xlsx [file c5mb00476d3.xlsx]

## Sheet: Sheet1
Supplementary Table 3: Detailed list of drug-target associations predicted for M. tuberculosis.
Highlighted entries denote the targets which have evidence on their pharmaceutical relevance
RvID	Essential gene?	Protein description	Protein length	Crystal structure/model [region]	UniProt ID of known target homologous to Mtb protein	Protein description	Protein length	Crystal structure [region]	Source organism	Sequence identity between Mtb protein and known target	TM-score	DrugBank ID of the drug associated with known target	Drug name
Rv0005	Yes	DNA gyrase subunit B	675	3ZKB:A [2-427],3M4I:A [448-675]	P0A0K8	DNA gyrase subunit B	644	4URO:A [1-231],4PLB:B [410-543,580-644]	Staphylococcus aureus	55%	0.9	DB01051	Novobiocin
Rv0006	Yes	DNA gyrase subunit A	838	3IFZ:A [1-501],4G3N:A [512-838]	P72525	DNA topoisomerase 4 subunit A	823	3RAE:A [1-488]	Streptococcus pneumoniae serotype 4 (strain ATCC BAA-334 / TIGR4)	43%	0.93	DB00218,DB00467,DB00487,DB00537,DB00817,DB00978,DB01044,DB01059,DB01137,DB01155,DB01165,DB01208,DB04576,DB06771	Moxifloxacin,Enoxacin,Pefloxacin,Ciprofloxacin,Rosoxacin,Lomefloxacin,Gatifloxacin,Norfloxacin,Levofloxacin,Gemifloxacin,Ofloxacin,Sparfloxacin,Fleroxacin,Besifloxacin
Rv0016c	No	Penicillin-binding protein A	491	3UN7:A [35-491]	Q51504	Penicillin-binding protein 3	579	3OCN:A [35-579]	Pseudomonas aeruginosia	25%	0.84	DB00274,DB00303,DB00430,DB00438,DB00535,DB00689,DB00671,DB00923,DB00948,DB01000,DB01053,DB01147,DB01163,DB01326,DB01327,DB01328,DB01329,DB01413,DB01415,DB01598,DB01607	Cefmetazole,Ertapenem,Cefpiramide,Ceftazidime,Cefdinir,Cephaloglycin,Cefixime,Ceforanide,Mezlocillin,Cyclacillin,Benzylpenicillin,Cloxacillin,Amdinocillin,Cefamandole,Cefazolin,Cefonicid,Cefoperazone,Cefepime,Ceftibuten,Imipenem,Ticarcillin
Rv0050	Yes	Penicillin-binding protein 1A	678	modelled (template- 2OLV:A) [24-643]	Q04707	Penicillin-binding protein 1A	719	2ZC5:A,2ZC5:B [47-70,264-653]	Streptococcus pneumoniae serotype 4 (strain ATCC BAA-334 / TIGR4)	22%	0.87	DB00229,DB00267,DB00274,DB00301,DB00303,DB00319,DB00415,DB00417,DB00430,DB00438,DB00456,DB00485,DB00493,DB00567,DB00607,DB00671,DB00713,DB00833,DB00923,DB00948,DB01000,DB01060,DB01061,DB01066,DB01112,DB01139,DB01140,DB01147,DB01150,DB01163,DB01326,DB01327,DB01328,DB01329,DB01331,DB01332,DB01413,DB01414,DB01415,DB01598,DB01602,DB01603,DB01604,DB01605,DB01607,DB08795	Cefotiam,Cefmenoxime,Cefmetazole,Flucloxacillin,Ertapenem,Piperacillin,Ampicillin,Penicillin V,Cefpiramide,Ceftazidime,Cefalotin,Dicloxacillin,Cefotaxime,Cephalexin,Nafcillin,Cefixime,Oxacillin,Cefaclor,Ceforanide,Mezlocillin,Cyclacillin,Amoxicillin,Azlocillin,Cefditoren,Cefuroxime,Cefapirin,Cefadroxil,Cloxacillin,Cefprozil,Amdinocillin,Cefamandole,Cefazolin,Cefonicid,Cefoperazone,Cefoxitin,Cefti…
Rv0118c	Yes	Oxalyl-CoA decarboxylase	582	modelled (template- 2Q28:A) [11-566]	P07003	Pyruvate dehydrogenase [ubiquinone]	572	3EY9:A [1-572]	Escherichia coli (strain K12)	22%	0.9	DB00336	Nitrofural
Rv0120c	No	Elongation factor G FusA2	714	modelled (template- 2DY1:A) [21-714]	Q5SHN5	Elongation factor G	691	4V5F:AY [1-691]	Thermus thermophilus	23%	0.68	DB02703	Fusidic Acid
Rv0136	No	Putative cytochrome P450 138	441	modelled (template- 2VE3:A) [13-439]	P50859	Lanosterol 14-alpha demethylase	533	modelled (template- 4K0F:A) [7-532]	Candida glabrata	18%	0.88	DB00196,DB00251,DB00582,DB01026,DB01110,DB01153,DB01263,DB04794,DB08933	Fluconazole,Terconazole,Voriconazole,Ketoconazole,Miconazole,Sertaconazole,Posaconazole,Bifonazole,Luliconazole
Rv0242c	No	3-oxoacyl-(Acyl-carrier-protein) reductase FabG4	454	3V1U:A [1-454]	P0AEK4	Enoyl-[acyl-carrier-protein] reductase [NADH] FabI	262	1QSG:A [1-262]	Escherichia coli (strain K12)	20%	0.85	DB08604	Triclosan
Rv0248c	Yes	Succinate dehydrogenase [iron-sulfur subunit]	646	modelled (template- 2WDQ:A) [2-622]	P00363	Fumarate reductase flavoprotein subunit	602	1KF6:A [1-602]	Escherichia coli (strain K12)	34%	0.91	DB00730	Thiabendazole
Rv0306	No	Cob(II)yrinic acid a,c-diamide reductase	223	modelled (template- 2ISK:A) [2-211]	P17117	Oxygen-insensitive NADPH nitroreductase	240	1F5V:A [1-240]	Escherichia coli (strain K12)	22%	0.7	DB00698	Nitrofurantoin
Rv0327c	Yes	Putative cytochrome P450 135A1	449	modelled (template- 2FDV:A) [6-437]	P50859	Lanosterol 14-alpha demethylase	533	modelled (template- 4K0F:A) [7-532]	Candida glabrata	20%	0.8	DB00196,DB00251,DB00582,DB01026,DB01110,DB01153,DB01167,DB01263,DB04794,DB08933	Fluconazole,Terconazole,Voriconazole,Ketoconazole,Miconazole,Sertaconazole,Itraconazole,Posaconazole,Bifonazole,Luliconazole
Rv0399c	Yes	D-alanyl-D-alanine carboxypeptidase	409	modelled (template- 1YQS:A) [29-401]	P15555	D-alanyl-D-alanine carboxypeptidase	406	1CEG:A [32-380]	Streptomyces sp. (strain R61)	23%	0.96	DB00456	Cefalotin
Rv0547c	No	Oxidoreductase	294	modelled (template- 3I3O:E) [8-292]	P0AEK4	Enoyl-[acyl-carrier-protein] reductase [NADH] FabI	262	1QSG:A [1-262]	Escherichia coli	19%	0.83	DB08604	Triclosan
Rv0568	No	Putative cytochrome P450 135B1	472	modelled (template- 2VE3:A) [6-440]	P50859	Lanosterol 14-alpha demethylase	533	modelled (template- 4K0F:A) [7-532]	Candida glabrata	19%	0.88	DB00196,DB00251,DB00582,DB01026,DB01110,DB01153,DB01167,DB01263,DB04794,DB08933	Fluconazole,Terconazole,Voriconazole,Ketoconazole,Miconazole,Sertaconazole,Itraconazole,Posaconazole,Bifonazole,Luliconazole
Rv0651	Yes	50S ribosomal protein L10	178	modelled (template- 1ZAV:A) [1-169]	P0A7J6	50S ribosomal protein L10	165	modelled (template- 1ZAV:A) [3-162]	Shigella flexneri	30%	0.82	DB00778,DB01190,DB01211,DB01369,DB01627	Roxithromycin,Clindamycin,Clarithromycin,Quinupristin,Lincomycin
Rv0682	Yes	30S ribosomal protein S12	124	modelled (template- 2VQE:L) [2-123]	P0A7S3	30S ribosomal protein S12	124	4V52:AL [2-124]	Escherichia coli (strain K12)	70%	0.86	DB00452,DB00560,DB00684,DB00798,DB00919,DB00955,DB00994,DB06696	Framycetin,Tigecycline,Tobramycin,Gentamicin,Spectinomycin,Netilmicin,Neomycin,Arbekacin
Rv0683	Yes	30S ribosomal protein S7	156	modelled (template- 1RSS) [14-155]	P02359	30S ribosomal protein S7	179	4U24:AG [2-152]	Escherichia coli (strain K12)	52%	0.83	DB00759	Tetracycline
Rv0684	Yes	Elongation factor G FusA1	701	modelled (template- 2XEX:A) [3-701]	Q5SHN5	Elongation factor G	691	4V5F:AY [1-691]	Thermus thermophilus	60%	0.8	DB02703	Fusidic Acid
Rv0687	Yes	Short-chain type dehydrogenase/reductase	275	modelled (template- 3PGX:A) [6-275]	P0AEK4	Enoyl-[acyl-carrier-protein] reductase [NADH] FabI	262	1QSG:A [1-262]	Escherichia coli (strain K12)	20%	0.84	DB08604	Triclosan
Rv0700	Yes	30S ribosomal protein S10	101	modelled (template- 3D3B:J) [1-101]	Q5SHN7	30S ribosomal protein S10	105	1FJG:J [1-105]	Thermus thermophilus (strain HB8 / ATCC 27634 / DSM 579)	53%	0.7	DB00698,DB01421	Nitrofurantoin,Paromomycin
Rv0702	Yes	50S ribosomal protein L4	223	modelled (temaplte- 3R8S:E) [9-215]	P60723	50S ribosomal protein L4	201	4V52:BE [1-201]	Escherichia coli (strain K12)	30%	0.8	DB00207,DB01321,DB01361	Azithromycin,Josamycin,Troleandomycin
Rv0705	Yes	30S ribosomal protein S19	93	modelled (template- 3R8N:S) [3-81]	P0A7U3	30S ribosomal protein S19	92	4U24:AS [3-81]	Escherichia coli (strain K12)	68%	0.86	DB00560,DB00759	Tigecycline,Tetracycline
Rv0706	Yes	50S ribosomal protein L22	197	modelled (template- 3R8S:S) [12-120]	P61177	50S ribosomal protein L22	110	modelled (template- 3R8S:S) [1-110]	Escherichia coli O157:H7	52%	0.94	DB00207,DB01369	Azithromycin,Quinupristin
Rv0707	Yes	30S ribosomal protein S3	274	modelled (template- 2VQE:C) [2-208]	P0A7V3	30S ribosomal protein S3	233	4U24:AC [2-207]	Escherichia coli (strain K12)	53%	0.97	DB00759	Tetracycline
Rv0708	Yes	50S ribosomal protein L16	138	modelled (template- 2J01:Q) [6-137]	P0ADY7	50S ribosomal protein L16	136	4V7T:BM [1-136]	Escherichia coli (strain K12)	45%	0.91	DB00446	Chloramphenicol
Rv0718	Yes	30S ribosomal protein S8	132	modelled (template- 1SEI:A) [2-131]	P0A7W7	30S ribosomal protein S8	130	4U24:AH [2-130]	Escherichia coli (strain K12)	47%	0.87	DB00759	Tetracycline
Rv0764c	No	Lanosterol 14-alpha demethylase	451	1EA1:A [1-451]	P50859	Lanosterol 14-alpha demethylase	533	modelled (template- 4K0F:A) [7-532]	Candida glabrata	27%	0.85	DB00196,DB00251,DB00582,DB01026,DB01110,DB01153,DB01167,DB01263,DB04794,DB08933	Fluconazole,Terconazole,Voriconazole,Ketoconazole,Miconazole,Sertaconazole,Itraconazole,Posaconazole,Bifonazole,Luliconazole
Rv0765c	No	Oxidoreductase	275	modelled (template- 2JAH:A) [8-255]	P0AEK4	Enoyl-[acyl-carrier-protein] reductase [NADH] FabI	262	1QSG:A [1-262]	Escherichia coli (strain K12)	17%	0.83	DB08604	Triclosan
Rv0769c	No	Oxidoreductase	248	modelled (template- 1YXM:A) [1-248]	P0AEK4	Enoyl-[acyl-carrier-protein] reductase [NADH] FabI	262	1QSG:A [1-262]	Escherichia coli (strain K12)	27%	0.84	DB08604	Triclosan
Rv0892	-	Monooxygenase	495	modelled (template- 3GWD:A) [2-482]	Q5L2G3	Oxidoreductase CzcO-like	348	modelled (template- 4A9W:A) [1-348]	Geobacillus kaustophilus (strain HTA426)	17%	0.72	DB00845	Clofazimine
Rv0907	Yes	Conserved protein	532	modelled (template- 3HLC:A) [41-407]	P15555	D-alanyl-D-alanine carboxypeptidase	406	1CEG:A [32-380]	Streptomyces sp. (strain R61)	20%	0.77	DB00456	Cefalotin
Rv0927c	No	Short-chain type dehydrogenase/reductase	263	modelled (template- 1FMC:A) [4-250]	P0AEK4	Enoyl-[acyl-carrier-protein] reductase [NADH] FabI	262	1QSG:A [1-262]	Escherichia coli	23%	0.88	DB08604	Triclosan
Rv0945	-	Short-chain type dehydrogenase/reductase	253	modelled (template- 3AI3:A) [1-250]	P0AEK4	Enoyl-[acyl-carrier-protein] reductase [NADH] FabI	262	1QSG:A [1-262]	Escherichia coli	15%	0.83	DB08604	Triclosan
Rv1050	No	Oxidoreductase	301	modelled (template- 4DMM:A) [6-246]	P0AEK4	Enoyl-[acyl-carrier-protein] reductase [NADH] FabI	262	1QSG:A [1-262]	Escherichia coli	14%	0.83	DB08604	Triclosan
Rv1207	No	Dihydropteroate synthase 2 FolP2	318	2VP8:A [2-318]	P0AC13	Dihydropteroate synthase	282	1AJ0:A [1-282]	Escherichia coli (strain K12)	31%	0.86	DB00250,DB00259,DB00263,DB00576,DB00634,DB01015,DB01298,DB01581,DB01582,DB06729	Dapsone,Sulfanilamide,Sulfisoxazole,Sulfamethizole,Sulfacetamide,Sulfamethoxazole,Sulfacytine,Sulfamerazine,Sulfamethazine,Sulfaphenazole
Rv1240	No	Malate dehydrogenase	329	modelled (template- 1Y7T:A) [3-329]	P61889	Malate dehydrogenase	312	1EMD:A [1-312]	Escherichia coli (strain K12)	20%	0.85	DB00336	Nitrofural
Rv1350	Yes	3-oxoacyl-[acyl-carrier protein] reductase FabG2	247	modelled (template- 3U5T:C) [10-244]	P0AEK4	Enoyl-[acyl-carrier-protein] reductase [NADH] FabI	262	1QSG:A [1-262]	Escherichia coli	22%	0.81	DB08604	Triclosan
Rv1393c	No	Monoxygenase	492	modelled (template- 3GWD:A) [2-492]	Q5L2G3	Oxidoreductase CzcO-like	348	modelled (template- 4A9W:A) [1-348]	Geobacillus kaustophilus (strain HTA426)	15%	0.74	DB00845	Clofazimine
Rv1483	Yes	3-oxoacyl-[acyl-carrier protein] reductase FabG1	247	1UZM:A [1-247]	P0AEK4	Enoyl-[acyl-carrier-protein] reductase [NADH] FabI	262	1QSG:A [1-262]	Escherichia coli	22%	0.86	DB08604	Triclosan
Rv1484	Yes	Enoyl-[acyl-carrier-protein] reductase [NADH]	269	4OHU:A [1-269]	P0AEK4	Enoyl-[acyl-carrier-protein] reductase [NADH] FabI	262	1QSG:A [1-262]	Escherichia coli	31%	0.92	DB08604	Triclosan
Rv1526c	No	Uncharacterized protein Rv1526c	426	modelled (template- 3H4T:A) [3-421]	P96558	dTDP-epi-vancosaminyltransferase	396	1PNV:A [1-396]	Amycolatopsis orientalis (Nocardia orientalis)	30%	0.98	DB00512	Vancomycin
Rv1536	Yes	Isoleucine--tRNA ligase	1041	modelled (template- 1ILE:A) [6-833]	P41972	Isoleucine--tRNA ligase	917	1FFY:A [1-917]	Staphylococcus aureus	22%	0.78	DB00410	Mupirocin
Rv1543	No	Fatty acyl-CoA reductase	341	modelled (template- 3SVT:A) [50-339]	P0AEK4	Enoyl-[acyl-carrier-protein] reductase [NADH] FabI	262	1QSG:A [1-262]	Escherichia coli	15%	0.85	DB08604	Triclosan
Rv1552	-	Fumarate reductase flavoprotein subunit	583	modelled (template- 3CIR:A) [2-577]	P00363	Fumarate reductase flavoprotein subunit	602	1KF6:A [1-602]	Escherichia coli (strain K12)	53%	0.93	DB00730	Thiabendazole
Rv1595	Yes	L-aspartate oxidase	527	modelled (template- 2WDQ:A) [7-525]	P00363	Fumarate reductase flavoprotein subunit	602	1KF6:A [1-602]	Escherichia coli (strain K12)	32%	0.94	DB00730	Thiabendazole
Rv1666c	No	Putative cytochrome P450 139	430	modelled (template- 3LD6:A) [2-427]	P50859	Lanosterol 14-alpha demethylase	533	modelled (template- 4K0F:A) [7-532]	Candida glabrata	22%	0.95	DB00196,DB00251,DB00582,DB01026,DB01110,DB01153,DB01167,DB01263,DB04794,DB08933	Fluconazole,Terconazole,Voriconazole,Ketoconazole,Miconazole,Sertaconazole,Itraconazole,Posaconazole,Bifonazole,Luliconazole
Rv1714	No	Oxidoreductase	270	modelled (template- 2A4K:A) [19-268]	P0AEK4	Enoyl-[acyl-carrier-protein] reductase [NADH] FabI	262	1QSG:A [1-262]	Escherichia coli	22%	0.78	DB08604	Triclosan
Rv1730c	Yes	Penicillin-binding protein	517	modelled (template- 4IVK:A) [38-400]	P05193	Beta-lactamase	381	1RGY:A [22-381]	Citrobacter freundii	22%	0.77	DB00355,DB00456,DB01147	Aztreonam,Cefalotin,Cloxacillin
Rv1820	No	Acetolactate synthase large subunit IlvG	547	modelled (template- 2UZ1:A) [9-544]	P07003	Pyruvate dehydrogenase [ubiquinone]	572	3EY9:A [1-572]	Escherichia coli (strain K12)	21%	0.88	DB00336	Nitrofural
Rv1850	No	Urease alpha subunit UreC	577	modelled (template- 4UBP:C) [3-577]	P18314	Urease subunit alpha	671	1FWE:C [1-567]	Enterobacter aerogenes	60%	0.95	DB00551	Acetohydroxamic Acid
Rv1922	No	Conserved lipoprotein	371	modelled (template- 1YQS:A) [40-371]	P15555	D-alanyl-D-alanine carboxypeptidase	406	1CEG:A [32-380]	Streptomyces sp. (strain R61)	26.5%	0.97	DB00355,DB00456,DB01147	Aztreonam,Cefalotin,Cloxacillin
Rv1928c	No	Short-chain type dehydrogenase/reductase	255	modelled (template- 3R1I:A) [2-255]	P0AEK4	Enoyl-[acyl-carrier-protein] reductase [NADH] FabI	262	1QSG:A [1-262]	Escherichia coli	20%	0.86	DB08604	Triclosan
Rv1941	No	Short-chain type dehydrogenase/reductase	256	3GVC:A [1-256]	P0AEK4	Enoyl-[acyl-carrier-protein] reductase [NADH] FabI	262	1QSG:A [1-262]	Escherichia coli	21%	0.9	DB08604	Triclosan
Rv2002	No	3-alpha-(or 20-beta)-hydroxysteroid dehydrogenase FabG3	260	1NFF:A [1-260]	P0AEK4	Enoyl-[acyl-carrier-protein] reductase [NADH] FabI	262	1QSG:A [1-262]	Escherichia coli	20%	0.89	DB08604	Triclosan
Rv2056c	No	30S ribosomal protein S14	101	modelled (template- 2AVY:N) [2-101]	P0AG59	30S ribosomal protein S14	101	4U24:AN [2-101]	Escherichia coli (strain K12)	31%	0.72	DB00560,DB00759	Tigecycline,Tetracycline
Rv2068c	No	Beta-lactamase	307	3CG5:A [43-307]	P00807	Beta-lactamase	281	1BLC:A [25-281]	Staphylococcus aureus	32%	0.92	DB00766,DB01598,DB01606	Clavulanate,Imipenem,Tazobactam
Rv2139	Yes	Dihydroorotate dehydrogenase PyrD	357	modelled (template- 1F76:A) [1-332]	Q08210	Dihydroorotate dehydrogenase (quinone)	569	1TV5:A [158-569]	Plasmodium falciparum (isolate 3D7)	32%	0.92	DB01117	Atovaquone
Rv2163c	Yes	Cell division protein FtsI	679	modelled (template- 3PBO:A) [132-672]	Q51504	Penicillin-binding protein 3	579	3OCN:A [35-579]	Pseudomonas aeruginosa	34%	0.93	DB00267,DB00274,DB00303,DB00319,DB00355,DB00415,DB00417,DB00430,DB00438,DB00456,DB00485,DB00493,DB00535,DB00567,DB00607,DB00671,DB00713,DB00923,DB00948,DB01000,DB01053,DB01066,DB01140,DB01147,DB01150,DB01163,DB01212,DB01326,DB01327,DB01328,DB01329,DB01331,DB01332,DB01413,DB01415,DB01416,DB01598,DB01603,DB01607,DB08795	Cefmenoxime,Cefmetazole,Ertapenem,Piperacillin,Aztreonam,Ampicillin,Penicillin V,Cefpiramide,Ceftazidime,Cefalotin,Dicloxacillin,Cefotaxime,Cefdinir,Cephalexin,Nafcillin,Cefixime,Oxacillin,Ceforanide,Mezlocillin,Cyclacillin,Benzylpenicillin,Cefditoren,Cefadroxil,Cloxacillin,Cefprozil,Amdinocillin,Ceftriaxone,Cefamandole,Cefazolin,Cefonicid,Cefoperazone,Cefoxitin,Ceftizoxime,Cefepime,Ceftibuten,Ce…
Rv2447c	Yes	Folylpolyglutamate synthase	487	2VOS:A [1-487]	P08192	Bifunctional protein FolC	422	1W78:A [1-422]	Escherichia coli (strain K12)	29%	0.85	DB01015	Sulfamethoxazole
Rv2703	Yes	RNA polymerase sigma factor SigA	528	modelled (template- 1SIG:A,2A6H:F) [120-362,222-528]	Q18BX5	RNA polymerase sigma factor SigA	390	modelled (template- 2A6H:F) [115-390]	Peptoclostridium difficile (strain 630)	55%	-	DB08874	Fidaxomicin
Rv2764c	Yes	Thymidylate synthase ThyA	263	3QJ7:A [1-263]	P13922	Bifunctional dihydrofolate reductase-thymidylate synthase	608	1J3I:A,1J3I:C [1-280,281-608]	Plasmodium falciparum (isolate K1 / Thailand)	45%	0.96	DB01299	Sulfadoxine
Rv2766c	No	Short-chain type dehydrogenase/reductase	260	modelled (template- 3NUG:A) [5-245]	P0AEK4	Enoyl-[acyl-carrier-protein] reductase [NADH] FabI	262	1QSG:A [1-262]	Escherichia coli	20%	0.9	DB08604	Triclosan
Rv2857c	Yes	Short-chain type dehydrogenase/reductase	258	modelled (template- 1IY8:A) [7-254]	P0AEK4	Enoyl-[acyl-carrier-protein] reductase [NADH] FabI	262	1QSG:A [1-262]	Escherichia coli	20%	0.87	DB08604	Triclosan
Rv2864c	No	Penicillin-binding lipoprotein	603	modelled (template- 4MNR:A) [275-598]	P0A3M6	Penicillin-binding protein 2B	680	2WAD:A [1-680]	Streptococcus pneumoniae (strain ATCC BAA-255 / R6)	17%	0.78	DB00274,DB00303,DB00319,DB00415,DB00430,DB00438,DB00456,DB00485,DB00493,DB00567,DB00607,DB00713,DB00923,DB00948,DB01000,DB01066,DB01140,DB01147,DB01150,DB01163,DB01212,DB01326,DB01327,DB01328,DB01329,DB01331,DB01413,DB01415,DB01598,DB01603,DB01607,DB08795	Cefmetazole,Ertapenem,Piperacillin,Ampicillin,Cefpiramide,Ceftazidime,Cefalotin,Dicloxacillin,Cefotaxime,Cephalexin,Nafcillin,Oxacillin,Ceforanide,Mezlocillin,Cyclacillin,Cefditoren,Cefadroxil,Cloxacillin,Cefprozil,Amdinocillin,Ceftriaxone,Cefamandole,Cefazolin,Cefonicid,Cefoperazone,Cefoxitin,Cefepime,Ceftibuten,Imipenem,Meticillin,Ticarcillin,Azidocillin
Rv2911	Yes	D-alanyl-D-alanine carboxypeptidase	291	4P0M:A [25-291]	P0AEB2	D-alanyl-D-alanine carboxypeptidase DacA	403	3MZE:A [30-386]	Escherichia coli (strain K12)	29%	0.89	DB00274,DB00303,DB00319,DB00415,DB00430,DB00438,DB00447,DB00456,DB00485,DB00567,DB00607,DB00713,DB00766,DB00833,DB00948,DB01000,DB01140,DB01147,DB01163,DB01329,DB01330,DB01331,DB01598,DB01603,DB01606,DB08795	Cefmetazole,Ertapenem,Piperacillin,Ampicillin,Cefpiramide,Ceftazidime,Cefalotin,Dicloxacillin,Cephalexin,Nafcillin,Oxacillin,Clavulanate,Cefaclor,Mezlocillin,Cyclacillin,Cefadroxil,Cloxacillin,Amdinocillin,Cefotetan,Cefoxitin,Imipenem,Meticillin,Tazobactam,Azidocillin
Rv3003c	Yes	Acetolactate synthase large subunit IlvB1	618	modelled (template- 1T9B:A) [32-618]	P07003	Pyruvate dehydrogenase [ubiquinone]	572	3EY9:A [1-572]	Escherichia coli (strain K12)	26%	0.85	DB00336	Nitrofural
Rv3034c	Yes	Putative acetyltransferase Rv3034c	300	modelled (template- 3DHO:A) [115-299]	P50870	Streptogramin A acetyltransferase	209	1MRL:A [1-209]	Enterococcus faecium	23%	0.89	DB01764	Dalfopristin
Rv3059	No	Putative cytochrome P450 136	492	modelled (template- 2VE3:A) [53-490]	P50859	Lanosterol 14-alpha demethylase	533	modelled (template- 4K0F:A) [7-532]	Candida glabrata	20%	0.88	DB00196,DB00251,DB00582,DB01026,DB01110,DB01153,DB01167,DB01263,DB04794,DB08933	Fluconazole,Terconazole,Voriconazole,Ketoconazole,Miconazole,Sertaconazole,Itraconazole,Posaconazole,Bifonazole,Luliconazole
Rv3318	No	Succinate dehydrogenase (flavoprotein subunit) SdhA	590	modelled (template- 2WDQ:A) [2-590]	P00363	Fumarate reductase flavoprotein subunit	602	1KF6:A [1-602]	Escherichia coli (strain K12)	41%	0.93	DB00730	Thiabendazole
Rv3330	Yes	D-alanyl-D-alanine carboxypeptidase	405	4PPR:A [38-368]	P08506	D-alanyl-D-alanine carboxypeptidase DacC	400	3ITA:A [28-378]	Escherichia coli (strain K12)	28%	0.87	DB00274,DB00303,DB00319,DB00415,DB00430,DB00438,DB00456,DB00485,DB00567,DB00607,DB00713,DB00833,DB00948,DB01000,DB01140,DB01147,DB01163,DB01329,DB01330,DB01331,DB01603,DB08795	Cefmetazole,Ertapenem,Piperacillin,Ampicillin,Cefpiramide,Ceftazidime,Cefalotin,Dicloxacillin,Cephalexin,Nafcillin,Oxacillin,Cefaclor,Mezlocillin,Cyclacillin,Cefadroxil,Cloxacillin,Amdinocillin,Cefoperazone,Cefotetan,Cefoxitin,Meticillin,Azidocillin
Rv3442c	Yes	30S ribosomal protein S9	151	modelled (template- 2VQE:I) [25-151]	P0A7X3	30S ribosomal protein S9	130	4U24:AI [4-130]	Escherichia coli (strain K12)	52%	0.86	DB00254,DB00256,DB00453,DB00560,DB00595,DB00618,DB01017,DB01301	Doxycycline,Lymecycline,Clomocycline,Tigecycline,Oxytetracycline,Demeclocycline,Minocycline,Rolitetracycline
Rv3458c	Yes	30S ribosomal protein S4	201	modelled (template- 3R8N:D) [2-201]	P0A7V8	30S ribosomal protein S4	206	4U24:AD [2-206]	Escherichia coli (strain K12)	46%	0.92	DB00254,DB00256,DB00453,DB00595,DB00618,DB01017	Doxycycline,Lymecycline,Clomocycline,Oxytetracycline,Demeclocycline,Minocycline
Rv3460c	Yes	30S ribosomal protein S13	124	modelled (template- 2VQE:M) [2-124]	P0A7S9	30S ribosomal protein S13	118	4U24:AM [2-115]	Escherichia coli (strain K12)	57%	0.84	DB00560	Tigecycline
Rv3470c	-	Putative acetolactate synthase large subunit IlvB2	552	modelled (template- 1OZH:A) [1-552]	P07003	Pyruvate dehydrogenase [ubiquinone]	572	3EY9:A [1-572]	Escherichia coli (strain K12)	21%	0.89	DB00336	Nitrofural
Rv3530c	No	Oxidoreductase	260	modelled (template- 3UCX:A) [3-258]	P0AEK4	Enoyl-[acyl-carrier-protein] reductase [NADH] FabI	262	1QSG:A [1-262]	Escherichia coli	22%	0.85	DB08604	Triclosan
Rv3559c	Yes	Oxidoreductase	262	modelled (template- 3O38:A) [2-261]	P0AEK4	Enoyl-[acyl-carrier-protein] reductase [NADH] FabI	262	1QSG:A [1-262]	Escherichia coli	25%	0.82	DB08604	Triclosan
Rv3608c	Yes	Dihydropteroate synthase 1 FolP	280	1EYE:A [1-280]	P0AC13	Dihydropteroate synthase	282	1AJ0:A [1-282]	Escherichia coli (strain K12)	40%	0.88	DB00250,DB00259,DB00263,DB00576,DB00634,DB01015,DB01298,DB01581,DB01582,DB06729	Dapsone,Sulfanilamide,Sulfisoxazole,Sulfamethizole,Sulfacetamide,Sulfamethoxazole,Sulfacytine,Sulfamerazine,Sulfamethazine,Sulfaphenazole
Rv3682	Yes	Bifunctional membrane-associated penicillin-binding protein 1A/1B PonA2	810	modelled (template- 3VMA:A) [60-648]	Q04707	Penicillin-binding protein 1A	719	2ZC5:A,2ZC5:B [47-70,264-653]	Streptococcus pneumoniae serotype 4 (strain ATCC BAA-334 / TIGR4)	20%	0.74	DB00229,DB00267,DB00274,DB00301,DB00319,DB00415,DB00417,DB00430,DB00438,DB00456,DB00485,DB00493,DB00567,DB00607,DB00713,DB00833,DB00948,DB01000,DB01060,DB01061,DB01066,DB01112,DB01139,DB01140,DB01147,DB01150,DB01163,DB01327,DB01329,DB01331,DB01602,DB01603,DB01604,DB01605,DB01607,DB08795	Cefotiam,Cefmenoxime,Cefmetazole,Flucloxacillin,Piperacillin,Ampicillin,Penicillin V,Cefpiramide,Ceftazidime,Cefalotin,Dicloxacillin,Cefotaxime,Cephalexin,Nafcillin,Oxacillin,Cefaclor,Mezlocillin,Cyclacillin,Amoxicillin,Azlocillin,Cefditoren,Cefuroxime,Cefapirin,Cefadroxil,Cloxacillin,Cefprozil,Amdinocillin,Cefazolin,Cefoperazone,Cefoxitin,Bacampicillin,Meticillin,Pivampicillin,Pivmecillinam,Tica…
