# Supplementary material for: Recognizing drug targets using evolutionary information: implications for repurposing FDA-approved drugs against Mycobacterium tuberculosis H37Rv
Source: Royal Society of Chemistry journal article supplement (doi:10.1039/c5mb00476d), 2015-09-22
Supplement: c5mb00476d4.xlsx [file c5mb00476d4.xlsx]

## Sheet: Sheet1
Supplementary Table 4: Details on high scoring binding pockets determined for M. tuberculosis targets using SiteMap
Rv ID	Protein length	Model/Structural region	Functional domain within the specified region	Pfam acc.no.	Domain region	No. of high scoring sites(>0.80)	SiteScore (rank-wise)	Druggability Score	Site residues
Rv0118c	582	11-566	TPP_enzyme_N	PF02776	13-184	3	site-1:1.044	site-1:1.054	res.num 74, 99, 100, 101, 160, 161, 162, 163, 164, 196, 197, 198, 199, 224, 225, 226, 229, 230, 232, 235, 248, 249, 250, 251, 252, 253, 254, 259, 260, 261, 262, 264, 265, 266, 267, 268, 269, 270, 271, 282, 283, 284, 285, 287, 288, 289, 290, 307, 308, 309, 310, 326, 327, 328, 329, 330, 358, 361, 362, 364, 365, 366, 368, 369, 378, 379, 386, 401, 402, 403, 404, 405, 406, 407, 409, 410, 411, 412, 413…
Rv0118c	582		TPP_enzyme_M	PF00205	206-335		site-3:0.888	site-3:0.736	res.num 23, 25, 26, 27, 28, 29, 30, 32, 69, 73, 74, 75, 76, 77, 78, 105, 152, 156, 160, 191, 192, 193, 194, 195, 196, 442
Rv0118c	582		TPP_enzyme_C	PF02775	400-552		site-2:0.865	site-2:0.736	res.num 375, 479, 480, 481, 486, 507, 508, 509, 510, 511, 512, 513, 527, 551, 553, 554, 555, 556
Rv0136	441	13-439	p450	PF00067	18-434	5	site-5:1.067	site-5:1.088	res.num 1, 17, 49, 61, 63, 68, 71, 72, 79, 80, 325, 330, 332, 333, 335, 336, 337, 343
Rv0136	441						site-1:1.055	site-1:1.059	res.num 1, 28, 29, 32, 33, 35, 36, 37, 38, 39, 40, 43, 48, 49, 50, 52, 53, 54, 55, 56, 57, 58, 59, 60, 62, 63, 64, 65, 66, 67, 68, 72, 73, 76, 77, 80, 81, 82, 83, 84, 85, 86, 88, 89, 91, 92, 93, 94, 96, 97, 98, 99, 100, 101, 104, 105, 108, 115, 123, 158, 161, 162, 180, 181, 184, 185, 186, 187, 188, 189, 236, 262, 263, 265, 266, 267, 269, 270, 271, 274, 277, 281, 284, 285, 312, 313, 314, 315, 316,…
Rv0136	441						site-3:0.980	site-3:0.998	res.num 147, 151, 177, 180, 181, 182, 265, 268, 269, 272, 273, 423, 425, 426, 427, 428, 429, 431
Rv0136	441						site-2:0.872	site-2:0.867	res.num 309, 356, 357, 358, 359, 362, 364, 366, 367, 368, 369, 370, 371, 372, 373, 374, 375, 376, 377, 378, 379, 380, 381, 382, 387
Rv0136	441						site-4:0.841	site-4:0.841	res.num 120, 121, 123, 124, 127, 128, 132, 298, 299, 300, 301, 304, 393, 396, 397, 399, 400, 403, 404, 407, 408
Rv0248c	646	2-622	FAD_binding_2	PF00890	10-429	5	site-1:1.118	site-1:1.051	res.num 1, 14, 15, 16, 17, 18, 19, 20, 37, 38, 39, 40, 41, 42, 44, 45, 46, 47, 48, 49, 50, 51, 52, 53, 65, 66, 67, 70, 91, 94, 95, 98, 99, 101, 102, 108, 115, 116, 118, 119, 120, 121, 126, 128, 129, 130, 131, 134, 135, 136, 137, 138, 139, 140, 172, 173, 174, 175, 207, 208, 209, 210, 211, 221, 222, 224, 225, 226, 227, 228, 229, 232, 249, 265, 266, 267, 269, 270, 318, 319, 320, 322, 388, 389, 411, …
Rv0248c	646		Succ_DH_flav_C	PF02910	488-596		site-3:1.035	site-3:1.002	res.num 1, 39, 40, 41, 44, 45, 46, 49, 50, 51, 135, 170, 171, 192, 214, 216, 217, 218, 219, 220, 221, 222, 223, 224, 226, 256, 258, 259, 260, 261, 262, 263, 264, 265, 363, 364, 367, 484, 485, 488, 492, 526, 527, 528, 529, 533, 535, 536, 538, 539, 540, 542, 543, 546
Rv0248c	646						site-4:1.030	site-4:1.001	res.num 1, 58, 59, 60, 61, 63, 65, 109, 110, 111, 113, 115, 116, 117, 118, 119, 120, 125, 126, 127, 129, 131, 133, 269, 270, 271, 272, 273, 274, 282, 316, 317, 318, 319, 351, 352, 356, 360
Rv0248c	646						site-2:1.005	site-2:1.009	res.num 1, 69, 72, 73, 75, 76, 77, 79, 120, 121, 122, 123, 124, 125, 129, 266, 269, 290, 291, 292, 293, 294, 297, 298, 300, 310, 311, 312, 313, 314, 315, 316, 317, 318, 319, 320, 321, 322, 323, 324, 325, 327, 422, 424, 425, 563, 564, 565, 567, 568, 573, 574, 575, 577, 616, 618, 619, 620, 621, 622
Rv0248c	646						site-5:0.899	site-5:0.897	res.num 234, 235, 236, 237, 465, 466, 467, 470, 471, 474, 475, 481, 519, 522, 523, 524, 525, 544, 548, 551, 555, 587, 588, 590
Rv0306	223	2-211	Nitroreductase	PF00881	14-179	1	site-1:0.879	site-1:0.850	res.num 19, 20, 21, 22, 23, 89, 91, 92, 93, 94, 95, 149, 150, 151, 152, 153, 184, 188, 189, 191, 192, 194
Rv0327c	449	6-437	p450	PF00067	10-433	5	site-1:1.208	site-1:1.253	res.num 1, 63, 67, 77, 78, 80, 83, 87, 92, 93, 94, 95, 100, 104, 107, 108, 110, 111, 116, 154, 176, 177, 180, 181, 184, 202, 205, 206, 209, 232, 258, 259, 261, 262, 263, 265, 266, 267, 270, 271, 273, 274, 304, 307, 308, 311, 312, 313, 314, 316, 317, 318, 319, 340, 342, 346, 374, 375, 376, 377, 378, 381, 382, 383, 384, 385, 386, 387, 388, 389, 390, 393, 397, 422, 423
Rv0327c	449						site-5:1.018	site-5:0.945	res.num 1, 141, 142, 143, 146, 147, 178, 181, 182, 265, 266, 268, 269, 272, 273, 275, 276, 311, 313, 415, 416, 417, 418, 423, 424, 425, 426, 427, 428, 429, 430, 432
Rv0327c	449						site-2:1.003	site-2:1.020	res.num 1, 28, 29, 32, 33, 45, 47, 49, 51, 52, 54, 75, 76, 77, 78, 79, 80, 81, 84, 87, 88, 89, 94, 95, 96, 97, 98, 99, 184, 188, 191, 314, 315, 316, 317, 318, 320, 322, 335, 337, 339, 341, 342, 343, 344, 381, 420, 421, 422
Rv0327c	449						site-3:0.989	site-3:0.956	res.num 1, 96, 97, 98, 99, 102, 103, 106, 107, 214, 217, 221, 232, 235, 236, 238, 239, 242, 245, 246, 247, 248, 249, 250, 251, 252, 253, 255, 256
Rv0327c	449						site-4:0.943	site-4:0.961	res.num 1, 27, 28, 29, 30, 273, 309, 310, 311, 312, 315, 343, 346, 347, 355, 356, 416, 417, 418, 419, 420, 421, 424
Rv0568	472	6-440	p450	PF00067	10-438	4	site-1:1.129	site-1:1.164	res.num 1, 18, 19, 22, 23, 25, 26, 27, 28, 29, 30, 31, 32, 33, 47, 48, 49, 50, 51, 53, 55, 66, 75, 76, 77, 78, 79, 80, 81, 82, 86, 91, 92, 93, 95, 99, 103, 106, 109, 110, 118, 142, 143, 145, 146, 153, 156, 157, 180, 182, 183, 184, 186, 187, 188, 189, 190, 197, 231, 254, 256, 257, 258, 260, 261, 262, 263, 264, 265, 266, 267, 268, 269, 271, 313, 314, 315, 316, 317, 318, 319, 320, 321, 322, 323, 324…
Rv0568	472						site-3:1.059	site-3:1.099	res.num 112, 115, 116, 118, 119, 122, 123, 127, 287, 288, 290, 291, 292, 293, 294, 295, 296, 299, 300, 302, 304, 305, 396, 399, 400, 402, 403, 404, 406, 407, 408
Rv0568	472						site-2:0.974	site-2:0.987	res.num 1, 101, 102, 104, 105, 108, 109, 111, 114, 117, 118, 121, 122, 124, 125, 152, 155, 156, 157, 159, 160, 162, 163, 164, 165, 166, 167, 168, 219, 228, 229, 230, 231, 234, 238, 239, 240, 241, 242, 246
Rv0568	472						site-5:0.831	site-5:0.553	res.num 66, 69, 70, 73, 74, 75, 95, 96, 99, 100, 324, 385, 386
Rv0651	178	1-169	Ribosomal_L10	PF00466	1-98	1	site-5:1.031	site-5:1.058	res.num 22, 23, 24, 80, 81, 82, 86, 87, 89, 90, 93, 108, 109, 110, 115, 120, 123
Rv0651	178						site-1:0.885	site-1:0.869	res.num 26, 27, 28, 29, 31, 39, 49, 93, 96, 97, 100, 102, 103, 104, 105
Rv0764c	451	3-449	p450	PF00067	7-444	5	site-1:0.993	site-1:1.033	res.num 83, 84, 86, 87, 88, 89, 92, 93, 94, 95, 99, 100, 101, 102, 103, 104, 105, 106, 109, 112, 113, 116, 119, 120, 123, 150, 151, 152, 153, 154, 155, 156, 158, 159, 160, 198, 209, 211, 212, 213, 215, 216, 218, 220, 221, 222, 223, 224, 225, 227, 228, 229, 230, 231, 240, 241, 245, 248, 249, 250, 252, 253, 399
Rv0764c	451						site-2:0.980	site-2:1.009	res.num 110, 300, 301, 303, 304, 305, 308, 309, 311, 312, 315, 370, 371, 372, 375, 377, 378, 381, 382, 384, 385, 386, 387, 388, 389, 390, 393, 397, 398, 401, 402, 405
Rv0764c	451						site-5:0.884	site-5:0.877	res.num 27, 31, 34, 35, 263, 267, 271, 274, 275, 316, 317, 318, 319, 320, 322, 350, 351, 353, 354, 355, 356, 362, 363, 364, 365, 424, 426, 427, 428, 430, 435, 436
Rv0764c	451						site-3:0.880	site-3:0.870	res.num 137, 138, 139, 141, 142, 163, 166, 167, 170, 171, 174, 175, 189, 190, 193, 194, 427, 429, 432, 434, 436, 437, 438, 439
Rv0764c	451						site-4:0.870	site-4:0.892	res.num 46, 47, 48, 72, 73, 74, 75, 76, 77, 79, 80, 83, 181, 182, 256, 321, 324, 326, 327, 344, 1449, 1450
Rv1240	329	3-329	Ldh_1_N	PF00056	6-155	2	site-1:1.035	site-1:1.083	res.num 11, 12, 15, 16, 17, 42, 43, 44, 73, 75, 88, 89, 90, 91, 92, 93, 109, 112, 113, 130, 131, 132, 134, 156, 157, 158, 159, 160, 163, 188, 189, 190, 192, 224, 225, 226, 227, 228, 229, 238, 239, 240, 243
Rv1240	329		Ldh_1_C	PF02866	157-326		site-3:1.010	site-3:0.981	res.num 84, 85, 86, 126, 127, 128, 129, 130, 154, 155, 156, 157, 158, 247, 250, 251, 254, 255, 264, 265, 266, 267
Rv1552	583	2-577	FAD_binding_2	PF00890	6-394	5	site-5:1.077	site-5:1.141	res.num 1, 37, 156, 173, 175, 178, 180, 431, 434, 435, 437, 438, 441, 497, 498, 499, 501, 502, 505, 506, 509
Rv1552	583		Succ_DH_flav_C	PF02910	455-581		site-2:1.076	site-2:1.097	res.num 1, 232, 233, 234, 243, 244, 245, 247, 248, 252, 253, 254, 281, 282, 283, 284, 285, 287, 288, 289, 291, 292, 295, 301, 302, 304, 305, 310, 311, 312, 313, 314, 348, 349, 350
Rv1552	583						site-1:1.039	site-1:1.009	res.num 1, 10, 11, 12, 13, 14, 15, 35, 36, 37, 38, 42, 43, 44, 45, 46, 47, 48, 49, 50, 51, 52, 67, 68, 71, 72, 74, 75, 114, 115, 116, 117, 118, 119, 120, 121, 122, 126, 128, 129, 130, 131, 132, 133, 155, 156, 157, 158, 159, 160, 170, 191, 192, 193, 194, 197, 201, 202, 203, 204, 205, 206, 207, 208, 209, 210, 211, 212, 214, 215, 217, 218, 227, 228, 229, 230, 231, 232, 233, 235, 236, 237, 238, 239, …
Rv1552	583						site-3:1.009	site-3:0.944	res.num 1, 37, 38, 154, 156, 175, 197, 198, 199, 200, 201, 202, 203, 204, 206, 207, 209, 238, 239, 451, 452, 455, 456, 459, 460, 501, 503, 506, 507, 510, 511, 514
Rv1552	583						site-4:0.996	site-4:0.947	res.num 2, 4, 5, 161, 164, 165, 166, 167, 168, 171, 180, 182, 184, 185, 186, 370, 371, 411, 416, 417, 418, 419, 420, 421, 423, 426, 427, 430, 431, 434
Rv1595	527	7-525	FAD_binding_2	PF00890	11-381	5	site-1:1.077	site-1:0.993	res.num 1, 15, 16, 17, 18, 19, 20, 21, 38, 39, 40, 41, 42, 43, 45, 46, 47, 48, 158, 159, 160, 192, 193, 194, 195, 197, 205, 206, 207, 208, 209, 210, 211, 212, 213, 216, 363, 364, 365, 462, 463, 466
Rv1595	527		Succ_DH_flav_C	PF02910	424-523		site-5:1.003	site-5:0.801	res.num 1, 16, 17, 18, 19, 20, 21, 46, 47, 48, 51, 192, 193, 194, 195, 209, 341, 362, 363, 364, 365, 380, 381, 383, 384
Rv1595	527						site-2:0.975	site-2:1.000	res.num 73, 76, 77, 79, 120, 121, 122, 123, 124, 125, 126, 127, 128, 254, 257, 258, 259, 260, 267, 269, 273, 275, 276, 277, 278, 279, 280, 282, 283, 284, 286, 376, 487, 488, 489, 490, 492, 499
Rv1595	527						site-3:0.886	site-3:0.876	res.num 23, 26, 27, 30, 31, 89, 90, 93, 97, 100, 101, 104, 144, 145, 148, 350, 385, 386, 389, 390, 393
Rv1595	527						site-4:0.857	site-4:0.780	res.num 200, 201, 202, 232, 236, 239, 240, 241, 242, 243, 244, 245, 246, 247, 289, 292, 324, 336, 337, 338, 339, 432, 436, 437, 438
Rv1666c	430	2-427	p450	PF00067	4-422	4	site-1:1.118	site-1:1.146	res.num 1, 2, 3, 5, 8, 9, 12, 20, 22, 23, 24, 25, 27, 29, 31, 49, 50, 52, 53, 56, 57, 65, 66, 67, 74, 77, 78, 81, 85, 117, 132, 156, 157, 158, 159, 161, 162, 163, 226, 227, 230, 231, 233, 234, 235, 237, 238, 239, 241, 242, 243, 245, 288, 292, 295, 296, 297, 298, 299, 300, 301, 302, 303, 321, 323, 324, 326, 363, 364, 365, 366, 370, 371, 372, 373, 374, 375, 377, 378, 379, 382, 405, 407, 410, 411, 4…
Rv1666c	430						site-3:1.113	site-3:1.177	res.num 118, 121, 122, 125, 128, 129, 133, 136, 137, 140, 141, 142, 144, 145, 146, 148, 149, 150, 183, 186, 187, 190, 228, 229, 232, 236
Rv1666c	430						site-2:1.050	site-2:1.090	res.num 1, 3, 4, 5, 6, 7, 9, 10, 245, 248, 249, 252, 253, 291, 294, 295, 296, 299, 300, 325, 327, 328, 331, 333, 339, 340, 341, 342, 402, 403, 404, 405, 406, 407, 408, 410, 413, 416
Rv1666c	430						site-5:0.894	site-5:0.751	res.num 1, 88, 89, 92, 93, 96, 130, 131, 134, 135, 136, 201, 202, 203
Rv1820	547	9-544	TPP_enzyme_N	PF02776	11-179	4	site-1:1.044	site-1:1.006	res.num 1, 62, 94, 215, 241, 242, 243, 244, 245, 247, 258, 259, 260, 261, 262, 263, 264, 265, 274, 281, 282, 283, 284, 288, 289, 344, 346, 347, 351, 384, 385, 386, 387, 388, 389, 390, 391, 394, 395, 397, 398, 405, 407, 408, 409, 410, 411, 412, 413, 414, 416, 420, 438, 439, 440, 441, 464, 466, 468, 469, 470, 471, 472, 540, 541, 542, 543
Rv1820	547		TPP_enzyme_M	PF00205	199-326		site-4:1.009	site-4:0.963	res.num 1, 213, 214, 215, 241, 258, 260, 261, 262, 263, 267, 268, 269, 272, 273, 274, 283, 288, 289, 290, 293, 337, 341
Rv1820	547		TPP_enzyme_C	PF02775	385-532		site-2:0.979	site-2:1.014	res.num 1, 239, 250, 251, 253, 254, 255, 256, 257, 258, 259, 260, 338, 341, 342, 344, 345, 347, 348, 349, 351, 352, 357, 366, 367, 369, 370, 373, 392, 395, 396, 398, 399, 400, 401
Rv1820	547						site-3:0.941	site-3:0.969	res.num 24, 25, 26, 68, 72, 73, 74, 101, 152, 156, 157, 158, 160, 185, 187, 188, 189, 190, 191, 192, 222, 223, 300, 316, 317, 318
Rv2447c	487	24-487	Mur_ligase_M	PF08245	69-309	3	site-2:1.058	site-2:1.001	res.num 1, 72, 73, 74, 77, 78, 100, 101, 102, 103, 104, 105, 106, 109, 176, 177, 178, 179, 180, 202, 203, 217, 218, 340, 356, 384, 386, 387, 412, 473, 474, 475, 1490, 1491, 1493, 1496
Rv2447c	487		Mur_ligase_C	PF02875	335-418		site-1:1.022	site-1:1.028	res.num 1, 40, 41, 43, 44, 45, 46, 47, 49, 51, 52, 77, 100, 101, 109, 152, 153, 154, 155, 157, 176, 177, 178, 179, 180, 181, 182, 183, 184, 185, 201, 202, 203, 204, 205, 206, 207, 208, 209, 210, 213, 214, 217, 218, 387, 388, 389, 390, 391, 412, 1490, 1491, 1493, 1496
Rv2447c	487						site-3:0.820	site-3:0.767	res.num 272, 273, 274, 275, 276, 294, 295, 296, 300, 336, 337, 338, 340, 341, 342, 343, 344, 346, 347, 349, 351, 371, 372, 373, 374, 464, 465, 486
Rv2764c	263	1-263	Thymidylat_synt	PF00303	1-263	5	site-3:1.107	site-3:1.090	res.num 116, 120, 157, 186, 189, 190, 191, 193, 194, 195, 196, 229, 230, 231, 232, 233, 234, 235, 236, 237, 238, 241, 264
Rv2764c	263						site-4:1.069	site-4:1.098	res.num 21, 51, 54, 55, 58, 62, 79, 80, 82, 83, 94, 143, 144, 146, 147, 166, 169, 172, 173, 176, 177, 180, 181, 209, 212, 600
Rv2764c	263						site-5:1.034	site-5:1.067	res.num 51, 54, 58, 62, 79, 80, 82, 83, 94, 143, 144, 145, 146, 147, 169, 172, 173, 176, 177, 180, 181, 601
Rv2764c	263						site-1:1.033	site-1:1.081	res.num 44, 48, 49, 50, 51, 52, 53, 58, 62, 79, 80, 83, 94, 143, 147, 169, 171, 172, 173, 175, 176, 177, 180, 209, 243, 244, 246, 247, 248, 251, 253, 256, 257, 258, 259, 602
Rv2764c	263						site-2:1.025	site-2:1.066	res.num 44, 48, 49, 50, 51, 52, 53, 54, 58, 62, 79, 80, 83, 94, 143, 144, 146, 147, 166, 169, 171, 172, 173, 175, 176, 177, 180, 181, 212, 215, 243, 244, 246, 247, 248, 249, 251, 256, 257, 258, 259, 603
Rv2864c	603	275-598	Transpeptidase	PF00905	325-594	3	site-2:1.059	site-2:1.025	res.num 359, 360, 361, 362, 364, 365, 368, 392, 397, 398, 400, 419, 422, 423, 426, 427, 429, 430, 431, 434, 460, 464, 465, 466, 468, 469, 470, 471, 472, 473, 474, 476, 477, 478, 554, 555
Rv2864c	603						site-1:1.029	site-1:1.094	res.num 275, 276, 304, 305, 306, 311, 315, 318, 320, 324, 325, 326, 340, 341, 342, 343, 344, 345, 346, 347, 348, 350, 351, 352, 353, 354, 355, 356, 358, 482, 503, 504, 578
Rv2864c	603						site-3:0.880	site-3:0.720	res.num 289, 357, 367, 441, 442, 443, 444, 445, 446, 447, 449, 450, 451, 452, 453, 454, 455, 456, 457, 480, 481, 483, 484, 485, 487, 488, 501
Rv3003c	618	32-618	TPP_enzyme_N	PF02776	38-207	3	site-1:1.049	site-1:1.006	res.num 32, 34, 35, 47, 50, 51, 53, 96, 97, 100, 101, 102, 126, 127, 128, 129, 173, 174, 176, 177, 178, 180, 181, 184, 185, 186, 187, 188, 207, 208, 209, 210, 211, 212, 213, 219, 220, 221, 222, 226, 244, 246, 247, 248, 249, 250, 251, 252, 254, 272, 273, 274, 275, 276, 277, 278, 289, 290, 291, 292, 293, 294, 310, 311, 312, 313, 314, 315, 316, 318, 319, 346, 347, 350, 351, 352, 353, 354, 355, 356, …
Rv3003c	618		TPP_enzyme_M	PF00205	228-363		site-2:1.026	site-2:1.013	res.num 276, 281, 282, 283, 284, 286, 287, 288, 289, 294, 295, 297, 389, 392, 393, 394, 411, 413, 414, 415, 416, 417, 418, 419, 421, 422, 423, 436, 437, 438, 439, 440, 441, 442, 446, 475, 477, 568
Rv3003c	618		TPP_enzyme_C	PF02775	426-579		site-3:1.023	site-3:1.051	res.num 394, 395, 396, 397, 398, 399, 402, 403, 404, 405, 406, 407, 433, 436, 437, 515, 518, 519, 520, 522, 523, 525, 557, 582, 583, 584, 585, 586, 587, 588, 589, 602, 603, 604, 605, 606, 607, 608, 609, 610, 611, 613, 614
Rv3059	492	53-490	p450	PF00067	56-481	3	site-1:1.094	site-1:1.119	res.num 1, 69, 72, 73, 74, 75, 76, 77, 78, 79, 80, 81, 91, 93, 94, 95, 96, 98, 99, 100, 101, 102, 113, 116, 122, 123, 124, 125, 126, 127, 128, 129, 130, 131, 133, 137, 138, 139, 140, 141, 145, 149, 156, 205, 229, 230, 232, 233, 234, 243, 299, 300, 302, 303, 304, 306, 307, 311, 317, 318, 321, 322, 360, 361, 362, 363, 364, 365, 366, 367, 368, 369, 370, 371, 372, 389, 390, 391, 393, 395, 396, 398, 3…
Rv3059	492						site-3:0.899	site-3:0.904	res.num 1, 65, 66, 69, 72, 73, 95, 96, 97, 126, 127, 128, 233, 234, 235, 236
Rv3059	492						site-2:0.838	site-2:0.782	res.num 116, 117, 120, 121, 122, 123, 141, 142, 145, 146, 371, 436, 437
Rv3318	590	2-590	FAD_binding_2	PF00890	8-401	4	site-1:1.062	site-1:0.981	res.num 1, 12, 13, 14, 15, 16, 17, 18, 34, 35, 36, 37, 38, 39, 41, 42, 43, 44, 45, 46, 47, 48, 49, 50, 117, 137, 138, 139, 140, 141, 162, 163, 164, 202, 203, 204, 205, 208, 210, 211, 212, 213, 214, 215, 216, 218, 219, 220, 221, 222, 223, 226, 242, 243, 247, 248, 249, 250, 251, 252, 253, 255, 256, 287, 295, 298, 299, 308, 309, 310, 329, 332, 333, 350, 351, 352, 353, 354, 355, 382, 383, 384, 385, 3…
Rv3318	590		Succ_DH_flav_C	PF02910	455-590		site-2:0.958	site-2:0.876	res.num 79, 81, 82, 85, 235, 361, 362, 363, 364, 369, 370, 371, 373, 387, 388, 389, 551, 553, 571, 572, 573, 574, 575, 576
Rv3318	590						site-4:0.896	site-4:0.893	res.num 75, 277, 278, 279, 288, 289, 292, 293, 296, 469, 531, 532, 533, 536, 541, 542, 543, 545, 587, 588, 589, 590
Rv3318	590						site-3:0.866	site-3:0.816	res.num 1, 36, 37, 161, 186, 208, 210, 217, 218, 220, 455, 459, 501, 502, 503, 506, 507, 510, 511, 514
Rv3470c	552	1-552	TPP_enzyme_N	PF02776	1-175	4	site-1:1.008	site-1:1.033	res.num 1, 87, 200, 203, 204, 206, 207, 208, 209, 228, 231, 232, 235, 237, 238, 240, 241, 242, 244, 245, 246, 247, 248, 249, 250, 251, 252, 253, 254, 255, 256, 257, 258, 259, 260, 261, 262, 263, 264, 265, 266, 267, 268, 269, 270, 271, 272, 273, 275, 276, 277, 278, 279, 280, 286, 287, 288, 289, 290, 292, 293, 296, 297, 298, 299, 300, 301, 302, 303, 304, 305, 306, 343, 344, 346, 350, 351, 352, 353,…
Rv3470c	552		TPP_enzyme_M	PF00205	197-336		site-2:0.989	site-2:0.964	res.num 1, 86, 87, 88, 89, 128, 148, 151, 152, 153, 154, 155, 178, 179, 180, 183, 184, 185, 186, 187, 188, 189, 215, 216, 217, 218, 220, 222, 223, 242, 282, 283, 284, 285, 286, 287, 288, 289, 307, 309, 310, 311, 312, 313, 314, 328, 329, 330, 331, 414, 416
Rv3470c	552		TPP_enzyme_C	PF02775	391-537		site-3:0.978	site-3:0.954	res.num 1, 13, 14, 16, 60, 61, 62, 63, 64, 65, 147, 148, 151, 152, 153, 155, 180, 181, 182, 183, 184, 185, 186, 218, 219, 220, 221, 222, 223, 224, 227, 228, 231, 243, 245, 246, 247, 248, 251, 409, 410, 434
Rv3470c	552						site-4:0.867	site-4:0.792	res.num 98, 99, 100, 101, 104, 105, 106, 107, 108, 109, 110, 132, 133, 134, 161, 163
