# Supplementary material for: Recognizing drug targets using evolutionary information: implications for repurposing FDA-approved drugs against Mycobacterium tuberculosis H37Rv
Source: Royal Society of Chemistry journal article supplement (doi:10.1039/c5mb00476d), 2015-09-22
Supplement: c5mb00476d5.xlsx [file c5mb00476d5.xlsx]

## Sheet: Sheet1
Supplementary Table 5: Details of 1367 ChEMBL compounds structurally similar to 101 FDA-approved drugs.
DrugBank ID	Drug description	Molecular formula	ChEMBL compound similar to the drug	Molecular formula	SHAFT score
DB00251	Terconazole	C26H31Cl2N5O3	CHEMBL1714574	C26H31Cl2N5O3	1.704
DB00251	Terconazole	C26H31Cl2N5O3	CHEMBL1410669	C26H31Cl2N5O3	1.704
DB00254	Doxycycline	C22H24N2O8	CHEMBL242074	C23H27IN2O8	2.137
DB00254	Doxycycline	C22H24N2O8	CHEMBL1483782	C22H23ClN2O8	2.095
DB00254	Doxycycline	C22H24N2O8	CHEMBL1356352	C22H25ClN2O8	2.095
DB00254	Doxycycline	C22H24N2O8	CHEMBL1574167	C22H25ClN2O8	2.028
DB00254	Doxycycline	C22H24N2O8	CHEMBL1783656	C25H24N2O7	1.928
DB00254	Doxycycline	C22H24N2O8	CHEMBL1782493	C25H25N3O7	1.925
DB00254	Doxycycline	C22H24N2O8	CHEMBL1182528	C23H27N2O8	1.92
DB00254	Doxycycline	C22H24N2O8	CHEMBL198	C22H24N2O8	1.896
DB00254	Doxycycline	C22H24N2O8	CHEMBL249837	C22H22N2O8	2.216
DB00254	Doxycycline	C22H24N2O8	CHEMBL1782489	C25H25N3O7	1.87
DB00254	Doxycycline	C22H24N2O8	CHEMBL2009312	C21H22N2O7	1.866
DB00254	Doxycycline	C22H24N2O8	CHEMBL1782482	C25H23FN2O7	1.853
DB00254	Doxycycline	C22H24N2O8	CHEMBL1398237	C22H28N2O11	1.837
DB00254	Doxycycline	C22H24N2O8	CHEMBL1892210	C22H28N2O11	1.837
DB00254	Doxycycline	C22H24N2O8	CHEMBL1950577	C22H25ClN2O8	1.833
DB00254	Doxycycline	C22H24N2O8	CHEMBL1783197	C27H29N3O7	1.833
DB00254	Doxycycline	C22H24N2O8	CHEMBL1782492	C26H26N2O8	1.828
DB00254	Doxycycline	C22H24N2O8	CHEMBL242073	C23H27IN2O8	1.824
DB00254	Doxycycline	C22H24N2O8	CHEMBL1560884	C22H22N2O8	2.183
DB00254	Doxycycline	C22H24N2O8	CHEMBL1783660	C27H29N3O7	1.813
DB00254	Doxycycline	C22H24N2O8	CHEMBL1968980	C21H23ClN2O7	1.81
DB00254	Doxycycline	C22H24N2O8	CHEMBL1782491	C27H29N3O7	1.806
DB00254	Doxycycline	C22H24N2O8	CHEMBL1619512	C22H24N2O9	1.798
DB00254	Doxycycline	C22H24N2O8	CHEMBL1354435	C22H24N2O9	1.798
DB00254	Doxycycline	C22H24N2O8	CHEMBL1622849	C22H24N2O9	1.798
DB00254	Doxycycline	C22H24N2O8	CHEMBL1783664	C28H31N3O7	1.784
DB00254	Doxycycline	C22H24N2O8	CHEMBL1782490	C26H27N3O7	1.777
DB00254	Doxycycline	C22H24N2O8	CHEMBL1783665	C29H33N3O7	1.772
DB00254	Doxycycline	C22H24N2O8	CHEMBL1372176	C22H24N2O8	2.183
DB00254	Doxycycline	C22H24N2O8	CHEMBL1783288	C29H31N3O7	1.771
DB00254	Doxycycline	C22H24N2O8	CHEMBL1783662	C30H35N3O7	1.767
DB00254	Doxycycline	C22H24N2O8	CHEMBL1783667	C30H33N3O7	1.748
DB00254	Doxycycline	C22H24N2O8	CHEMBL1782486	C29H31N3O7	1.748
DB00254	Doxycycline	C22H24N2O8	CHEMBL1475999	C22H25ClN2O9	1.747
DB00254	Doxycycline	C22H24N2O8	CHEMBL1625081	C22H24N2O8	1.734
DB00254	Doxycycline	C22H24N2O8	CHEMBL1443580	C22H24N2O8	1.734
DB00254	Doxycycline	C22H24N2O8	CHEMBL1620664	C22H24N2O8	1.734
DB00254	Doxycycline	C22H24N2O8	CHEMBL1512321	C22H24N2O8	1.734
DB00254	Doxycycline	C22H24N2O8	CHEMBL1782487	C28H31N3O7	1.715
DB00254	Doxycycline	C22H24N2O8	CHEMBL1622039	C22H22N2O8	2.183
DB00254	Doxycycline	C22H24N2O8	CHEMBL1782458	C29H31N3O8	1.709
DB00254	Doxycycline	C22H24N2O8	CHEMBL1485984	C22H24N2O8	1.704
DB00254	Doxycycline	C22H24N2O8	CHEMBL1783661	C29H33N3O7	1.701
DB00254	Doxycycline	C22H24N2O8	CHEMBL1782488	C29H31N3O7	1.699
DB00254	Doxycycline	C22H24N2O8	CHEMBL2104756	C21H23N3O7	1.677
DB00254	Doxycycline	C22H24N2O8	CHEMBL1782457	C31H35N3O7	1.676
DB00254	Doxycycline	C22H24N2O8	CHEMBL1562925	C22H25ClN2O8	1.662
DB00254	Doxycycline	C22H24N2O8	CHEMBL1783657	C31H28N2O7	1.651
DB00254	Doxycycline	C22H24N2O8	CHEMBL2419631	C22H25N3O8	2.178
DB00254	Doxycycline	C22H24N2O8	CHEMBL1437974	C23H28N2O11S	1.593
DB00254	Doxycycline	C22H24N2O8	CHEMBL1236180	C22H24N2O8	1.569
DB00254	Doxycycline	C22H24N2O8	CHEMBL2447928	C42H54N2O10	1.374
DB00254	Doxycycline	C22H24N2O8	CHEMBL2106517	C21H22N2O8	1.21
DB00254	Doxycycline	C22H24N2O8	CHEMBL1256723	C22H25ClN2O8	2.177
DB00254	Doxycycline	C22H24N2O8	CHEMBL1624566	C22H24N2O8	2.157
DB00254	Doxycycline	C22H24N2O8	CHEMBL1182529	C23H27N2O8	2.156
DB00256	Lymecycline	C29H38N4O10	CHEMBL1485984	C22H24N2O8	1.799
DB00256	Lymecycline	C29H38N4O10	CHEMBL1441971	C27H33N3O8	1.783
DB00256	Lymecycline	C29H38N4O10	CHEMBL2010387	C27H33N3O8	1.783
DB00256	Lymecycline	C29H38N4O10	CHEMBL1514090	C27H33N3O8	1.783
DB00256	Lymecycline	C29H38N4O10	CHEMBL1512321	C22H24N2O8	1.754
DB00256	Lymecycline	C29H38N4O10	CHEMBL1443580	C22H24N2O8	1.754
DB00256	Lymecycline	C29H38N4O10	CHEMBL1625081	C22H24N2O8	1.754
DB00256	Lymecycline	C29H38N4O10	CHEMBL1620664	C22H24N2O8	1.754
DB00256	Lymecycline	C29H38N4O10	CHEMBL1562925	C22H25ClN2O8	1.753
DB00256	Lymecycline	C29H38N4O10	CHEMBL1999395	C27H34ClN3O8	1.738
DB00256	Lymecycline	C29H38N4O10	CHEMBL1326554	C29H38N4O10	2.424
DB00256	Lymecycline	C29H38N4O10	CHEMBL1619512	C22H24N2O9	1.69
DB00256	Lymecycline	C29H38N4O10	CHEMBL1622849	C22H24N2O9	1.69
DB00256	Lymecycline	C29H38N4O10	CHEMBL1354435	C22H24N2O9	1.69
DB00256	Lymecycline	C29H38N4O10	CHEMBL1398237	C22H28N2O11	1.65
DB00256	Lymecycline	C29H38N4O10	CHEMBL1892210	C22H28N2O11	1.65
DB00256	Lymecycline	C29H38N4O10	CHEMBL1237046	C27H33N3O8	1.615
DB00256	Lymecycline	C29H38N4O10	CHEMBL2105824	C29H38N4O9	1.608
DB00256	Lymecycline	C29H38N4O10	CHEMBL2103905	C29H35N3O10	1.562
DB00256	Lymecycline	C29H38N4O10	CHEMBL2008596	C27H33N3O10	2.309
DB00256	Lymecycline	C29H38N4O10	CHEMBL1236180	C22H24N2O8	1.426
DB00256	Lymecycline	C29H38N4O10	CHEMBL2105868	C27H34N4O11	1.391
DB00256	Lymecycline	C29H38N4O10	CHEMBL2103960	C29H38N8O8	1.39
DB00256	Lymecycline	C29H38N4O10	CHEMBL2106517	C21H22N2O8	1.272
DB00256	Lymecycline	C29H38N4O10	CHEMBL2104382	C30H38N4O11	1.977
DB00256	Lymecycline	C29H38N4O10	CHEMBL198	C22H24N2O8	1.92
DB00256	Lymecycline	C29H38N4O10	CHEMBL2008915	C29H38N8O8	1.885
DB00256	Lymecycline	C29H38N4O10	CHEMBL1182528	C23H27N2O8	1.87
DB00256	Lymecycline	C29H38N4O10	CHEMBL1950577	C22H25ClN2O8	1.832
DB00256	Lymecycline	C29H38N4O10	CHEMBL242073	C23H27IN2O8	1.816
DB00263	Sulfisoxazole	C11H13N3O3S	CHEMBL267458	C17H19N3O3S	1.435
DB00263	Sulfisoxazole	C11H13N3O3S	CHEMBL29705	C17H19N3O3S	1.409
DB00263	Sulfisoxazole	C11H13N3O3S	CHEMBL30078	C13H17N3O3S	1.399
DB00263	Sulfisoxazole	C11H13N3O3S	CHEMBL80945	C11H11N3O5S	1.387
DB00263	Sulfisoxazole	C11H13N3O3S	CHEMBL148702	C11H13N3O3S	1.333
DB00263	Sulfisoxazole	C11H13N3O3S	CHEMBL30224	C12H15N3O3S	1.312
DB00263	Sulfisoxazole	C11H13N3O3S	CHEMBL27065	C15H14N2O3S	1.256
DB00263	Sulfisoxazole	C11H13N3O3S	CHEMBL26090	C15H15N3O3S	1.229
DB00263	Sulfisoxazole	C11H13N3O3S	CHEMBL281511	C15H15N3O3S	1.228
DB00263	Sulfisoxazole	C11H13N3O3S	CHEMBL286406	C15H15N3O3S	1.22
DB00263	Sulfisoxazole	C11H13N3O3S	CHEMBL332471	C13H17N3O3S	1.69
DB00263	Sulfisoxazole	C11H13N3O3S	CHEMBL30039	C15H15N3O3S	1.21
DB00263	Sulfisoxazole	C11H13N3O3S	CHEMBL27073	C17H19N3O3S	1.18
DB00263	Sulfisoxazole	C11H13N3O3S	CHEMBL287451	C17H19N3O3S	1.172
DB00263	Sulfisoxazole	C11H13N3O3S	CHEMBL27370	C16H17N3O3S	1.114
DB00263	Sulfisoxazole	C11H13N3O3S	CHEMBL26978	C17H19N3O3S	1.107
DB00263	Sulfisoxazole	C11H13N3O3S	CHEMBL283652	C19H23N3O3S	1.092
DB00263	Sulfisoxazole	C11H13N3O3S	CHEMBL416026	C18H21N3O3S	1.081
DB00263	Sulfisoxazole	C11H13N3O3S	CHEMBL286682	C14H19N3O3S	1.023
DB00263	Sulfisoxazole	C11H13N3O3S	CHEMBL312670	C11H12N2O3S	1.568
DB00263	Sulfisoxazole	C11H13N3O3S	CHEMBL78952	C12H14N2O3S	1.506
DB00263	Sulfisoxazole	C11H13N3O3S	CHEMBL286521	C11H13N3O3S	1.503
DB00263	Sulfisoxazole	C11H13N3O3S	CHEMBL30075	C15H15N3O3S	1.503
DB00263	Sulfisoxazole	C11H13N3O3S	CHEMBL281427	C15H15N3O3S	1.501
DB00263	Sulfisoxazole	C11H13N3O3S	CHEMBL25756	C15H15N3O3S	1.487
DB00263	Sulfisoxazole	C11H13N3O3S	CHEMBL283879	C15H15N3O3S	1.485
DB00263	Sulfisoxazole	C11H13N3O3S	CHEMBL282401	C17H19N3O3S	1.447
DB00267	Cefmenoxime	C16H17N9O5S3	CHEMBL84618	C16H17N9O5S3	1.096
DB00274	Cefmetazole	C15H17N7O5S3	CHEMBL1276342	C16H21N7O7S3	1.639
DB00274	Cefmetazole	C15H17N7O5S3	CHEMBL313040	C15H17N7O5S3	1.154
DB00274	Cefmetazole	C15H17N7O5S3	CHEMBL314036	C16H19N7O5S3	1.109
DB00274	Cefmetazole	C15H17N7O5S3	CHEMBL313970	C17H21N7O5S3	1.107
DB00301	Flucloxacillin	C19H17ClFN3O5S	CHEMBL26227	C20H19Cl2N3O5S	1.051
DB00301	Flucloxacillin	C19H17ClFN3O5S	CHEMBL24174	C20H20ClN3O5S	1.046
DB00301	Flucloxacillin	C19H17ClFN3O5S	CHEMBL1623166	C19H18ClN3O5S	3.303
DB00301	Flucloxacillin	C19H17ClFN3O5S	CHEMBL1742950	C19H17ClFN3O5S	3.269
DB00301	Flucloxacillin	C19H17ClFN3O5S	CHEMBL1616891	C19H17Cl2N3O5S	3.257
DB00301	Flucloxacillin	C19H17ClFN3O5S	CHEMBL1622721	C19H17Cl2N3O5S	3.257
DB00301	Flucloxacillin	C19H17ClFN3O5S	CHEMBL1622855	C19H17ClFN3O5S	3.253
DB00301	Flucloxacillin	C19H17ClFN3O5S	CHEMBL1398507	C19H17ClFN3O5S	3.253
DB00301	Flucloxacillin	C19H17ClFN3O5S	CHEMBL1624192	C19H18ClN3O5S	1.989
DB00303	Ertapenem	C22H25N3O7S	CHEMBL2431070	C26H33N3O7S	1.064
DB00303	Ertapenem	C22H25N3O7S	CHEMBL2431071	C25H29N3O7S	1.038
DB00319	Piperacillin	C23H27N5O7S	CHEMBL1624152	C20H23N5O6S	1.745
DB00319	Piperacillin	C23H27N5O7S	CHEMBL1742952	C23H27N5O7S	1.649
DB00319	Piperacillin	C23H27N5O7S	CHEMBL209761	C23H27N5O7S	3.901
DB00319	Piperacillin	C23H27N5O7S	CHEMBL1616077	C20H23N5O6S	3.318
DB00319	Piperacillin	C23H27N5O7S	CHEMBL1616926	C23H27N5O7S	2.376
DB00319	Piperacillin	C23H27N5O7S	CHEMBL2105850	C24H28N6O10S	2.341
DB00319	Piperacillin	C23H27N5O7S	CHEMBL1537	C20H23N5O6S	2.181
DB00319	Piperacillin	C23H27N5O7S	CHEMBL1201116	C19H23N3O4S	2.076
DB00319	Piperacillin	C23H27N5O7S	CHEMBL417013	C20H23N5O6S	2
DB00319	Piperacillin	C23H27N5O7S	CHEMBL1625673	C19H23N3O4S	1.919
DB00355	Aztreonam	C13H17N5O8S2	CHEMBL410081	C13H17N5O8S2	1.335
DB00355	Aztreonam	C13H17N5O8S2	CHEMBL1360450	C13H17N5O8S2	1.189
DB00410	Mupirocin	C26H44O9	CHEMBL38412	C27H46O9	1.55
DB00410	Mupirocin	C26H44O9	CHEMBL315230	C19H32O7	1.09
DB00415	Ampicillin	C16H19N3O4S	CHEMBL84080	C16H18N2O4S	3.045
DB00415	Ampicillin	C16H19N3O4S	CHEMBL312755	C16H18N2O4S	3.039
DB00415	Ampicillin	C16H19N3O4S	CHEMBL2107679	C31H35N3O4S	2.594
DB00415	Ampicillin	C16H19N3O4S	CHEMBL1620938	C17H19N3O4S	2.391
DB00415	Ampicillin	C16H19N3O4S	CHEMBL1367635	C16H19N3O5S	2.354
DB00415	Ampicillin	C16H19N3O4S	CHEMBL1433952	C16H19N3O5S	2.354
DB00415	Ampicillin	C16H19N3O4S	CHEMBL1200651	C32H38N4O4S	2.23
DB00415	Ampicillin	C16H19N3O4S	CHEMBL453388	C16H25N3O7S	5.021
DB00415	Ampicillin	C16H19N3O4S	CHEMBL1436257	C16H18N2O4S	4.849
DB00415	Ampicillin	C16H19N3O4S	CHEMBL300052	C16H18N2O4S	4.849
DB00415	Ampicillin	C16H19N3O4S	CHEMBL1619690	C17H19N3O4S	4.242
DB00415	Ampicillin	C16H19N3O4S	CHEMBL1616445	C17H18N2O6S	4.213
DB00415	Ampicillin	C16H19N3O4S	CHEMBL117967	C18H22N2O4S	4.086
DB00415	Ampicillin	C16H19N3O4S	CHEMBL1908324	C17H19N3O4S	3.27
DB00415	Ampicillin	C16H19N3O4S	CHEMBL1214	C17H18N2O6S	3.211
DB00417	Penicillin	C16H18N2O5S	CHEMBL2373720	C18H22N2O5S	1.585
DB00417	Penicillin	C16H18N2O5S	CHEMBL1619236	C17H20N2O5S	4.394
DB00417	Penicillin	C16H18N2O5S	CHEMBL1620845	C17H20N2O5S	4.394
DB00417	Penicillin	C16H18N2O5S	CHEMBL1614637	C17H20N2O5S	4.002
DB00417	Penicillin	C16H18N2O5S	CHEMBL2105612	C18H22N2O5S	2.823
DB00417	Penicillin	C16H18N2O5S	CHEMBL1711169	C16H18N2O5S	2.584
DB00417	Penicillin	C16H18N2O5S	CHEMBL1622026	C17H20N2O5S	2.582
DB00417	Penicillin	C16H18N2O5S	CHEMBL1477112	C18H22N2O5S	2.426
DB00417	Penicillin	C16H18N2O5S	CHEMBL2111179	C18H22N2O5S	2.018
DB00417	Penicillin	C16H18N2O5S	CHEMBL1549651	C17H20N2O5S	2.001
DB00438	Ceftazidime	C22H22N6O7S2	CHEMBL63210	C22H19N7O5S2	1.565
DB00438	Ceftazidime	C22H22N6O7S2	CHEMBL65904	C23H20N6O6S2	1.556
DB00438	Ceftazidime	C22H22N6O7S2	CHEMBL238784	C27H30N8O7S2	1.551
DB00438	Ceftazidime	C22H22N6O7S2	CHEMBL70167	C23H20N6O5S2	1.519
DB00438	Ceftazidime	C22H22N6O7S2	CHEMBL70079	C24H28N6O5S2	1.511
DB00438	Ceftazidime	C22H22N6O7S2	CHEMBL303107	C23H21N7O5S2	1.5
DB00438	Ceftazidime	C22H22N6O7S2	CHEMBL291389	C23H20N6O6S2	1.491
DB00438	Ceftazidime	C22H22N6O7S2	CHEMBL2114045	C20H19N7O5S3	1.485
DB00438	Ceftazidime	C22H22N6O7S2	CHEMBL302343	C23H20N6O6S2	1.468
DB00438	Ceftazidime	C22H22N6O7S2	CHEMBL259691	C25H28ClN7O7S2	1.465
DB00438	Ceftazidime	C22H22N6O7S2	CHEMBL261867	C22H22N6O7S2	2.939
DB00438	Ceftazidime	C22H22N6O7S2	CHEMBL259485	C24H27ClN8O7S2	1.417
DB00438	Ceftazidime	C22H22N6O7S2	CHEMBL393080	C28H32N8O7S2	1.404
DB00438	Ceftazidime	C22H22N6O7S2	CHEMBL260985	C24H25ClN8O7S2	1.333
DB00438	Ceftazidime	C22H22N6O7S2	CHEMBL65362	C22H24N7O7S2	1.846
DB00438	Ceftazidime	C22H22N6O7S2	CHEMBL304588	C19H18N6O5S2	1.666
DB00438	Ceftazidime	C22H22N6O7S2	CHEMBL46829	C19H19N6O5S2	1.657
DB00438	Ceftazidime	C22H22N6O7S2	CHEMBL2115114	C19H17ClN6O5S2	1.652
DB00438	Ceftazidime	C22H22N6O7S2	CHEMBL304311	C20H20N6O5S2	1.649
DB00438	Ceftazidime	C22H22N6O7S2	CHEMBL2115113	C19H17ClN6O5S2	1.643
DB00438	Ceftazidime	C22H22N6O7S2	CHEMBL430793	C23H20N6O5S2	1.578
DB00438	Ceftazidime	C22H22N6O7S2	CHEMBL67550	C23H20N6O6S2	1.573
DB00447	Loracarbef	C16H16ClN3O4	CHEMBL214386	C16H16ClN3O4	1.641
DB00452	Framycetin	C23H46N6O13	CHEMBL1533156	C23H45N5O14	1.401
DB00452	Framycetin	C23H46N6O13	CHEMBL1624130	C23H45N5O14	1.401
DB00452	Framycetin	C23H46N6O13	CHEMBL1623060	C23H45N5O14	1.401
DB00452	Framycetin	C23H46N6O13	CHEMBL1322152	C23H45N5O14	1.401
DB00452	Framycetin	C23H46N6O13	CHEMBL3040076	C19H38N4O11	1.391
DB00452	Framycetin	C23H46N6O13	CHEMBL606551	C23H44N4O15	1.386
DB00452	Framycetin	C23H46N6O13	CHEMBL1481003	C17H34N4O10	1.378
DB00452	Framycetin	C23H46N6O13	CHEMBL2333424	C18H37N5O10	1.377
DB00452	Framycetin	C23H46N6O13	CHEMBL1617486	C17H34N4O10	1.374
DB00452	Framycetin	C23H46N6O13	CHEMBL2333427	C18H37N5O10	1.37
DB00452	Framycetin	C23H46N6O13	CHEMBL227649	C27H54N6O14	1.365
DB00452	Framycetin	C23H46N6O13	CHEMBL2368386	C19H42Cl4N4O12	1.357
DB00452	Framycetin	C23H46N6O13	CHEMBL3039778	C18H36N4O10	1.355
DB00452	Framycetin	C23H46N6O13	CHEMBL2333423	C18H36N4O11	1.338
DB00452	Framycetin	C23H46N6O13	CHEMBL2368384	C18H40Cl4N4O11	1.333
DB00452	Framycetin	C23H46N6O13	CHEMBL228152	C25H49N5O15	1.332
DB00452	Framycetin	C23H46N6O13	CHEMBL2034990	C23H45N5O10	1.32
DB00452	Framycetin	C23H46N6O13	CHEMBL474967	C17H34N4O10	1.297
DB00452	Framycetin	C23H46N6O13	CHEMBL1288865	C23H45N5O12	1.295
DB00452	Framycetin	C23H46N6O13	CHEMBL402786	C23H46N6O13	1.291
DB00452	Framycetin	C23H46N6O13	CHEMBL2368385	C19H42Cl4N4O11	1.288
DB00452	Framycetin	C23H46N6O13	CHEMBL387934	C17H33N3O11	1.287
DB00452	Framycetin	C23H46N6O13	CHEMBL2333426	C18H37N5O10	1.27
DB00452	Framycetin	C23H46N6O13	CHEMBL2368628	C18H41Cl4N5O10	1.265
DB00452	Framycetin	C23H46N6O13	CHEMBL1554479	C23H47N5O18S	1.261
DB00452	Framycetin	C23H46N6O13	CHEMBL1516135	C23H47N5O18S	1.261
DB00452	Framycetin	C23H46N6O13	CHEMBL598581	C18H36N4O9	1.247
DB00452	Framycetin	C23H46N6O13	CHEMBL223520	C18H36N4O11	1.24
DB00452	Framycetin	C23H46N6O13	CHEMBL1395097	C23H45N5O14	1.235
DB00452	Framycetin	C23H46N6O13	CHEMBL1182203	C17H33N3O11	1.234
DB00452	Framycetin	C23H46N6O13	CHEMBL1316563	C17H36N4O14S	1.233
DB00452	Framycetin	C23H46N6O13	CHEMBL2368383	C18H40Cl4N4O10	1.232
DB00452	Framycetin	C23H46N6O13	CHEMBL1486384	C18H36N4O11	1.217
DB00452	Framycetin	C23H46N6O13	CHEMBL1487860	C18H36N4O11	1.217
DB00452	Framycetin	C23H46N6O13	CHEMBL1623920	C18H36N4O11	1.217
DB00452	Framycetin	C23H46N6O13	CHEMBL264546	C19H38N4O11	1.205
DB00452	Framycetin	C23H46N6O13	CHEMBL1403353	C18H37N5O9	1.201
DB00452	Framycetin	C23H46N6O13	CHEMBL1314828	C18H37N5O9	1.201
DB00452	Framycetin	C23H46N6O13	CHEMBL1184880	C17H33N3O11	1.197
DB00452	Framycetin	C23H46N6O13	CHEMBL1182228	C17H34N4O10	1.192
DB00452	Framycetin	C23H46N6O13	CHEMBL500813	C23H46N6O13	1.185
DB00452	Framycetin	C23H46N6O13	CHEMBL1331937	C18H37N5O10	1.178
DB00452	Framycetin	C23H46N6O13	CHEMBL2105594	C18H37N5O10	1.173
DB00452	Framycetin	C23H46N6O13	CHEMBL1184867	C17H34N4O10	1.17
DB00452	Framycetin	C23H46N6O13	CHEMBL1741729	C25H50N6O13	1.168
DB00452	Framycetin	C23H46N6O13	CHEMBL118013	C24H48N6O11	1.164
DB00452	Framycetin	C23H46N6O13	CHEMBL1624185	C18H37N5O8	1.151
DB00452	Framycetin	C23H46N6O13	CHEMBL1162918	C21H43N5O11	1.133
DB00452	Framycetin	C23H46N6O13	CHEMBL599188	C18H37N5O7	1.123
DB00452	Framycetin	C23H46N6O13	CHEMBL228160	C25H50N6O14	1.591
DB00452	Framycetin	C23H46N6O13	CHEMBL605966	C17H35N5O7	1.12
DB00452	Framycetin	C23H46N6O13	CHEMBL194346	C18H36N4O10	1.119
DB00452	Framycetin	C23H46N6O13	CHEMBL1950493	C23H50N6O18S	1.114
DB00452	Framycetin	C23H46N6O13	CHEMBL389029	C29H55N5O18	1.111
DB00452	Framycetin	C23H46N6O13	CHEMBL38377	C19H39N5O11	1.111
DB00452	Framycetin	C23H46N6O13	CHEMBL370180	C21H43N5O11	1.093
DB00452	Framycetin	C23H46N6O13	CHEMBL2333428	C18H36N4O8	1.093
DB00452	Framycetin	C23H46N6O13	CHEMBL598583	C18H37N5O7	1.091
DB00452	Framycetin	C23H46N6O13	CHEMBL2220021	C18H36N4O10	1.088
DB00452	Framycetin	C23H46N6O13	CHEMBL2303743	C18H36N4O10	1.077
DB00452	Framycetin	C23H46N6O13	CHEMBL3039857	C19H38N4O12	1.5
DB00452	Framycetin	C23H46N6O13	CHEMBL194912	C24H50N6O12	1.07
DB00452	Framycetin	C23H46N6O13	CHEMBL196111	C21H44N6O10	1.062
DB00452	Framycetin	C23H46N6O13	CHEMBL2206190	C18H38N4O14S	1.061
DB00452	Framycetin	C23H46N6O13	CHEMBL2096826	C21H44N6O10	1.056
DB00452	Framycetin	C23H46N6O13	CHEMBL2096733	C21H44N6O10	1.056
DB00452	Framycetin	C23H46N6O13	CHEMBL1199292	C30H60N6O13	1.051
DB00452	Framycetin	C23H46N6O13	CHEMBL2220322	C18H36N4O10	1.044
DB00452	Framycetin	C23H46N6O13	CHEMBL2220023	C18H36N4O10	1.044
DB00452	Framycetin	C23H46N6O13	CHEMBL2220482	C19H38N4O10	1.042
DB00452	Framycetin	C23H46N6O13	CHEMBL2220350	C19H38N4O10	1.042
DB00452	Framycetin	C23H46N6O13	CHEMBL3040332	C18H36N4O11	1.494
DB00452	Framycetin	C23H46N6O13	CHEMBL2206191	C18H38N4O14S	1.034
DB00452	Framycetin	C23H46N6O13	CHEMBL122030	C19H40N6O7	1.03
DB00452	Framycetin	C23H46N6O13	CHEMBL2303624	C18H36N4O11	1.027
DB00452	Framycetin	C23H46N6O13	CHEMBL197693	C17H34N4O10	1.025
DB00452	Framycetin	C23H46N6O13	CHEMBL240104	C18H37N5O9	1.023
DB00452	Framycetin	C23H46N6O13	CHEMBL2206188	C18H38N4O14S	1.021
DB00452	Framycetin	C23H46N6O13	CHEMBL372517	C21H43N5O10	1.019
DB00452	Framycetin	C23H46N6O13	CHEMBL373500	C17H34N4O10.H2O4S	1.012
DB00452	Framycetin	C23H46N6O13	CHEMBL372626	C18H37N5O9	1.009
DB00452	Framycetin	C23H46N6O13	CHEMBL1159782	C19H39N5O9	1.005
DB00452	Framycetin	C23H46N6O13	CHEMBL2333425	C18H38N6O9	1.414
DB00452	Framycetin	C23H46N6O13	CHEMBL288690	C18H38N6O9	1.004
DB00452	Framycetin	C23H46N6O13	CHEMBL3039996	C18H37N5O10	1.403
DB00453	Clomocycline	C23H25ClN2O9	CHEMBL1532053	C21H22Cl2N2O8	1.906
DB00453	Clomocycline	C23H25ClN2O9	CHEMBL1450620	C21H22Cl2N2O8	1.906
DB00453	Clomocycline	C23H25ClN2O9	CHEMBL2106006	C22H25ClN2O12S	1.753
DB00453	Clomocycline	C23H25ClN2O9	CHEMBL1414452	C21H21ClN2O8	2.144
DB00453	Clomocycline	C23H25ClN2O9	CHEMBL1950580	C22H24Cl2N2O8	2.114
DB00453	Clomocycline	C23H25ClN2O9	CHEMBL1963084	C22H23ClN2O8	2.108
DB00453	Clomocycline	C23H25ClN2O9	CHEMBL1616378	C22H23ClN2O8	2.048
DB00453	Clomocycline	C23H25ClN2O9	CHEMBL1475495	C22H23ClN2O8	2.048
DB00453	Clomocycline	C23H25ClN2O9	CHEMBL1623588	C21H21ClN2O8	2.006
DB00453	Clomocycline	C23H25ClN2O9	CHEMBL1620916	C21H21ClN2O8	2.006
DB00453	Clomocycline	C23H25ClN2O9	CHEMBL1354256	C22H24Cl2N2O8	1.979
DB00456	Cefalotin	C16H16N2O6S2	CHEMBL1161455	C16H16N2O6S2	1.999
DB00456	Cefalotin	C16H16N2O6S2	CHEMBL46973	C15H14N2O6S2	1.735
DB00467	Enoxacin	C15H17FN4O3	CHEMBL98886	C18H21FN4O3	1.999
DB00467	Enoxacin	C15H17FN4O3	CHEMBL2114358	C18H21FN4O3	1.995
DB00467	Enoxacin	C15H17FN4O3	CHEMBL356697	C18H23FN4O3	1.971
DB00467	Enoxacin	C15H17FN4O3	CHEMBL132632	C16H17FN4O3	1.97
DB00467	Enoxacin	C15H17FN4O3	CHEMBL2114357	C18H23FN4O3	1.965
DB00467	Enoxacin	C15H17FN4O3	CHEMBL334543	C15H16F2N4O3	1.952
DB00467	Enoxacin	C15H17FN4O3	CHEMBL134496	C17H21FN4O3	1.943
DB00467	Enoxacin	C15H17FN4O3	CHEMBL295067	C16H17FN4O3	1.938
DB00467	Enoxacin	C15H17FN4O3	CHEMBL51678	C16H17FN4O3	1.938
DB00467	Enoxacin	C15H17FN4O3	CHEMBL334991	C16H17FN4O3	1.938
DB00467	Enoxacin	C15H17FN4O3	CHEMBL151424	C16H17FN4O3	2.127
DB00467	Enoxacin	C15H17FN4O3	CHEMBL121176	C17H19FN4O3	1.937
DB00467	Enoxacin	C15H17FN4O3	CHEMBL138404	C17H19FN4O3	1.929
DB00467	Enoxacin	C15H17FN4O3	CHEMBL131762	C15H17FN4O3	1.926
DB00467	Enoxacin	C15H17FN4O3	CHEMBL132095	C17H19FN4O3	1.925
DB00467	Enoxacin	C15H17FN4O3	CHEMBL136013	C17H19FN4O3	1.921
DB00467	Enoxacin	C15H17FN4O3	CHEMBL2111894	C18H23FN4O3	1.907
DB00467	Enoxacin	C15H17FN4O3	CHEMBL2112701	C18H23FN4O3	1.907
DB00467	Enoxacin	C15H17FN4O3	CHEMBL291131	C15H16F2N4O3	1.903
DB00467	Enoxacin	C15H17FN4O3	CHEMBL133666	C17H21FN4O3	1.9
DB00467	Enoxacin	C15H17FN4O3	CHEMBL2112726	C17H21FN4O3	1.9
DB00467	Enoxacin	C15H17FN4O3	CHEMBL433928	C16H19FN4O3	2.127
DB00467	Enoxacin	C15H17FN4O3	CHEMBL283750	C16H17FN4O3	1.887
DB00467	Enoxacin	C15H17FN4O3	CHEMBL19581	C16H17FN4O3	1.887
DB00467	Enoxacin	C15H17FN4O3	CHEMBL132932	C15H17FN4O3	1.844
DB00467	Enoxacin	C15H17FN4O3	CHEMBL41702	C16H19FN4O3	1.82
DB00467	Enoxacin	C15H17FN4O3	CHEMBL2114356	C19H25FN4O3	1.811
DB00467	Enoxacin	C15H17FN4O3	CHEMBL2092975	C18H23FN4O3	1.802
DB00467	Enoxacin	C15H17FN4O3	CHEMBL1788110	C18H23FN4O3	1.802
DB00467	Enoxacin	C15H17FN4O3	CHEMBL327280	C19H23FN4O3	1.791
DB00467	Enoxacin	C15H17FN4O3	CHEMBL2012917	C19H19FN4O3	1.782
DB00467	Enoxacin	C15H17FN4O3	CHEMBL133025	C15H16F2N4O3	1.772
DB00467	Enoxacin	C15H17FN4O3	CHEMBL61949	C16H17FN4O3	2.125
DB00467	Enoxacin	C15H17FN4O3	CHEMBL2112710	C21H29FN4O3	1.684
DB00467	Enoxacin	C15H17FN4O3	CHEMBL2111895	C21H29FN4O3	1.684
DB00467	Enoxacin	C15H17FN4O3	CHEMBL116912	C17H18F2N4O3	1.653
DB00467	Enoxacin	C15H17FN4O3	CHEMBL155880	C18H19FN4O3	1.485
DB00467	Enoxacin	C15H17FN4O3	CHEMBL451488	C16H18F2N4O3	1.435
DB00467	Enoxacin	C15H17FN4O3	CHEMBL288250	C16H19FN4O3	1.43
DB00467	Enoxacin	C15H17FN4O3	CHEMBL416420	C17H21FN4O3	1.424
DB00467	Enoxacin	C15H17FN4O3	CHEMBL289260	C14H15FN4O3	1.407
DB00467	Enoxacin	C15H17FN4O3	CHEMBL289995	C16H18F2N4O3	1.407
DB00467	Enoxacin	C15H17FN4O3	CHEMBL160468	C17H17FN4O3	1.403
DB00467	Enoxacin	C15H17FN4O3	CHEMBL357766	C18H21FN4O3	2.116
DB00467	Enoxacin	C15H17FN4O3	CHEMBL276583	C16H17FN4O3	1.399
DB00467	Enoxacin	C15H17FN4O3	CHEMBL100354	C16H19FN4O3	1.367
DB00467	Enoxacin	C15H17FN4O3	CHEMBL39730	C18H23FN4O3	1.365
DB00467	Enoxacin	C15H17FN4O3	CHEMBL134720	C17H21FN4O3	1.359
DB00467	Enoxacin	C15H17FN4O3	CHEMBL26891	C17H21FN4O3	1.357
DB00467	Enoxacin	C15H17FN4O3	CHEMBL122152	C17H21FN4O3	1.352
DB00467	Enoxacin	C15H17FN4O3	CHEMBL25807	C18H23FN4O3	1.352
DB00467	Enoxacin	C15H17FN4O3	CHEMBL283387	C18H21FN4O3	1.34
DB00467	Enoxacin	C15H17FN4O3	CHEMBL103309	C13H15FN4O3	1.337
DB00467	Enoxacin	C15H17FN4O3	CHEMBL25741	C18H23FN4O3	1.335
DB00467	Enoxacin	C15H17FN4O3	CHEMBL335699	C16H17FN4O3	2.109
DB00467	Enoxacin	C15H17FN4O3	CHEMBL282078	C19H25FN4O3	1.332
DB00467	Enoxacin	C15H17FN4O3	CHEMBL37413	C17H21FN4O3	1.33
DB00467	Enoxacin	C15H17FN4O3	CHEMBL37683	C15H17FN4O3	1.324
DB00467	Enoxacin	C15H17FN4O3	CHEMBL338925	C17H22FN5O3	1.318
DB00467	Enoxacin	C15H17FN4O3	CHEMBL131664	C17H20FN5O3	1.316
DB00467	Enoxacin	C15H17FN4O3	CHEMBL38026	C16H19FN4O3	1.31
DB00467	Enoxacin	C15H17FN4O3	CHEMBL25808	C18H23FN4O3	1.308
DB00467	Enoxacin	C15H17FN4O3	CHEMBL288634	C17H20F2N4O3	1.307
DB00467	Enoxacin	C15H17FN4O3	CHEMBL1178397	C19H23FN4O3	1.305
DB00467	Enoxacin	C15H17FN4O3	CHEMBL283385	C19H25FN4O3	1.3
DB00467	Enoxacin	C15H17FN4O3	CHEMBL336766	C17H19FN4O3	2.099
DB00467	Enoxacin	C15H17FN4O3	CHEMBL282196	C19H25FN4O3	1.299
DB00467	Enoxacin	C15H17FN4O3	CHEMBL287031	C16H17FN4O4	1.283
DB00467	Enoxacin	C15H17FN4O3	CHEMBL1178411	C18H22F2N4O3	1.273
DB00467	Enoxacin	C15H17FN4O3	CHEMBL1183225	C19H25FN4O3	1.266
DB00467	Enoxacin	C15H17FN4O3	CHEMBL1178391	C20H25FN4O3	1.247
DB00467	Enoxacin	C15H17FN4O3	CHEMBL1183203	C18H23FN4O3	1.243
DB00467	Enoxacin	C15H17FN4O3	CHEMBL1183156	C18H23FN4O3	1.243
DB00467	Enoxacin	C15H17FN4O3	CHEMBL102667	C19H25FN4O3	1.241
DB00467	Enoxacin	C15H17FN4O3	CHEMBL26947	C18H23FN4O3	1.239
DB00467	Enoxacin	C15H17FN4O3	CHEMBL99850	C15H15FN4O4	1.236
DB00467	Enoxacin	C15H17FN4O3	CHEMBL439637	C17H17FN4O3	2.075
DB00467	Enoxacin	C15H17FN4O3	CHEMBL102618	C21H21FN4O3	1.235
DB00467	Enoxacin	C15H17FN4O3	CHEMBL345900	C18H19FN4O3	1.233
DB00467	Enoxacin	C15H17FN4O3	CHEMBL103868	C16H17FN4O4	1.233
DB00467	Enoxacin	C15H17FN4O3	CHEMBL322022	C17H19FN4O4	1.231
DB00467	Enoxacin	C15H17FN4O3	CHEMBL1183109	C19H23FN4O3	1.195
DB00467	Enoxacin	C15H17FN4O3	CHEMBL26903	C19H23FN4O3	1.182
DB00467	Enoxacin	C15H17FN4O3	CHEMBL160497	C19H21FN4O3	1.18
DB00467	Enoxacin	C15H17FN4O3	CHEMBL102617	C22H23FN4O3	1.178
DB00467	Enoxacin	C15H17FN4O3	CHEMBL130031	C18H21FN4O5	1.147
DB00467	Enoxacin	C15H17FN4O3	CHEMBL291144	C17H18F4N4O3	1.062
DB00467	Enoxacin	C15H17FN4O3	CHEMBL148579	C17H19FN4O3	2.069
DB00467	Enoxacin	C15H17FN4O3	CHEMBL102462	C19H25FN4O3	1.026
DB00467	Enoxacin	C15H17FN4O3	CHEMBL105156	C18H23FN4O3	1.026
DB00467	Enoxacin	C15H17FN4O3	CHEMBL132079	C18H23FN4O3	2.064
DB00485	Dicloxacillin	C19H17Cl2N3O5S	CHEMBL1624192	C19H18ClN3O5S	1.975
DB00485	Dicloxacillin	C19H17Cl2N3O5S	CHEMBL281317	C19H18ClN3O6S	1.203
DB00485	Dicloxacillin	C19H17Cl2N3O5S	CHEMBL26227	C20H19Cl2N3O5S	1.049
DB00485	Dicloxacillin	C19H17Cl2N3O5S	CHEMBL24174	C20H20ClN3O5S	1.044
DB00485	Dicloxacillin	C19H17Cl2N3O5S	CHEMBL1623166	C19H18ClN3O5S	3.294
DB00485	Dicloxacillin	C19H17Cl2N3O5S	CHEMBL1620722	C19H17ClFN3O5S	3.262
DB00485	Dicloxacillin	C19H17Cl2N3O5S	CHEMBL1742950	C19H17ClFN3O5S	3.262
DB00485	Dicloxacillin	C19H17Cl2N3O5S	CHEMBL1622721	C19H17Cl2N3O5S	3.252
DB00485	Dicloxacillin	C19H17Cl2N3O5S	CHEMBL1622855	C19H17ClFN3O5S	3.246
DB00485	Dicloxacillin	C19H17Cl2N3O5S	CHEMBL1398507	C19H17ClFN3O5S	3.246
DB00485	Dicloxacillin	C19H17Cl2N3O5S	CHEMBL222645	C19H17ClFN3O5S	3.246
DB00487	Pefloxacin	C17H20FN3O3	CHEMBL1631371	C22H21F2N3O3	1.644
DB00487	Pefloxacin	C17H20FN3O3	CHEMBL574481	C21H24FN3O4	1.64
DB00487	Pefloxacin	C17H20FN3O3	CHEMBL583949	C19H20FN3O5	1.632
DB00487	Pefloxacin	C17H20FN3O3	CHEMBL320964	C22H21FN4O3	1.629
DB00487	Pefloxacin	C17H20FN3O3	CHEMBL2104775	C18H28FN3O8S	1.613
DB00487	Pefloxacin	C17H20FN3O3	CHEMBL1187301	C20H27FN3O5	1.599
DB00487	Pefloxacin	C17H20FN3O3	CHEMBL2152314	C22H26FN3O4	1.596
DB00487	Pefloxacin	C17H20FN3O3	CHEMBL28519	C16H17F2N3O3	1.586
DB00487	Pefloxacin	C17H20FN3O3	CHEMBL283849	C17H19F2N3O3	1.583
DB00487	Pefloxacin	C17H20FN3O3	CHEMBL1428564	C18H24FN3O6S	1.582
DB00487	Pefloxacin	C17H20FN3O3	CHEMBL108986	C21H26FN3O3	2.036
DB00487	Pefloxacin	C17H20FN3O3	CHEMBL29237	C17H20FN3O3	1.58
DB00487	Pefloxacin	C17H20FN3O3	CHEMBL497251	C20H27BrFN3O5	1.58
DB00487	Pefloxacin	C17H20FN3O3	CHEMBL1631366	C22H20F3N3O3	1.568
DB00487	Pefloxacin	C17H20FN3O3	CHEMBL130064	C18H21FN4O3	1.565
DB00487	Pefloxacin	C17H20FN3O3	CHEMBL1631368	C22H20F3N3O3	1.559
DB00487	Pefloxacin	C17H20FN3O3	CHEMBL131360	C21H29FN4O3	1.546
DB00487	Pefloxacin	C17H20FN3O3	CHEMBL108513	C21H26FN3O6	1.538
DB00487	Pefloxacin	C17H20FN3O3	CHEMBL189394	C21H21FN4O3	1.531
DB00487	Pefloxacin	C17H20FN3O3	CHEMBL574037	C22H26FN3O4	1.527
DB00487	Pefloxacin	C17H20FN3O3	CHEMBL343603	C19H22FN3O3	2.016
DB00487	Pefloxacin	C17H20FN3O3	CHEMBL15148	C20H24FN3O3	1.512
DB00487	Pefloxacin	C17H20FN3O3	CHEMBL47255	C18H19F2N3O3	1.511
DB00487	Pefloxacin	C17H20FN3O3	CHEMBL2152310	C23H28FN3O4	1.508
DB00487	Pefloxacin	C17H20FN3O3	CHEMBL128404	C18H23FN4O3	1.487
DB00487	Pefloxacin	C17H20FN3O3	CHEMBL73577	C16H18FN3O2	1.483
DB00487	Pefloxacin	C17H20FN3O3	CHEMBL27358	C23H22FN3O4	1.481
DB00487	Pefloxacin	C17H20FN3O3	CHEMBL356614	C24H28FN3O3	1.473
DB00487	Pefloxacin	C17H20FN3O3	CHEMBL116788	C18H19F2N3O3	1.462
DB00487	Pefloxacin	C17H20FN3O3	CHEMBL116418	C18H19F2N3O3	1.462
DB00487	Pefloxacin	C17H20FN3O3	CHEMBL2152315	C24H22FN3O4	1.46
DB00487	Pefloxacin	C17H20FN3O3	CHEMBL1180570	C20H25FN3O3	2.016
DB00487	Pefloxacin	C17H20FN3O3	CHEMBL15467	C18H22FN3O3	1.45
DB00487	Pefloxacin	C17H20FN3O3	CHEMBL67194	C29H34FN5O3	1.447
DB00487	Pefloxacin	C17H20FN3O3	CHEMBL15373	C18H20FN3O3	1.438
DB00487	Pefloxacin	C17H20FN3O3	CHEMBL417530	C19H21F2N3O3	1.438
DB00487	Pefloxacin	C17H20FN3O3	CHEMBL274980	C19H22FN3O3	1.431
DB00487	Pefloxacin	C17H20FN3O3	CHEMBL429961	C18H20FN3O3	1.429
DB00487	Pefloxacin	C17H20FN3O3	CHEMBL15361	C18H20FN3O3	1.428
DB00487	Pefloxacin	C17H20FN3O3	CHEMBL15362	C20H24FN3O3	1.427
DB00487	Pefloxacin	C17H20FN3O3	CHEMBL14866	C20H24FN3O3	1.416
DB00487	Pefloxacin	C17H20FN3O3	CHEMBL282095	C17H18FN3O3	1.413
DB00487	Pefloxacin	C17H20FN3O3	CHEMBL540258	C19H25ClFN3O3	2.012
DB00487	Pefloxacin	C17H20FN3O3	CHEMBL15524	C16H18FN3O3	1.41
DB00487	Pefloxacin	C17H20FN3O3	CHEMBL131375	C18H19FN4O3	1.407
DB00487	Pefloxacin	C17H20FN3O3	CHEMBL282867	C17H19F2N3O3	1.406
DB00487	Pefloxacin	C17H20FN3O3	CHEMBL15531	C19H22FN3O3	1.406
DB00487	Pefloxacin	C17H20FN3O3	CHEMBL736	C14H16FN3O3	1.406
DB00487	Pefloxacin	C17H20FN3O3	CHEMBL325975	C17H17F2N3O3	1.404
DB00487	Pefloxacin	C17H20FN3O3	CHEMBL284890	C15H16FN3O3	1.401
DB00487	Pefloxacin	C17H20FN3O3	CHEMBL275411	C19H24FN3O3	1.396
DB00487	Pefloxacin	C17H20FN3O3	CHEMBL2152312	C23H28FN3O4	1.391
DB00487	Pefloxacin	C17H20FN3O3	CHEMBL274050	C17H20FN3O3	1.386
DB00487	Pefloxacin	C17H20FN3O3	CHEMBL160405	C20H22FN3O3	1.974
DB00487	Pefloxacin	C17H20FN3O3	CHEMBL15350	C20H26FN3O3	1.385
DB00487	Pefloxacin	C17H20FN3O3	CHEMBL29189	C19H22FN3O3	1.381
DB00487	Pefloxacin	C17H20FN3O3	CHEMBL283890	C17H20FN3O3	1.378
DB00487	Pefloxacin	C17H20FN3O3	CHEMBL15387	C18H22FN3O3	1.375
DB00487	Pefloxacin	C17H20FN3O3	CHEMBL15087	C17H18FN3O3	1.375
DB00487	Pefloxacin	C17H20FN3O3	CHEMBL35974	C18H20FN3O3	1.369
DB00487	Pefloxacin	C17H20FN3O3	CHEMBL15353	C18H20FN3O3	1.366
DB00487	Pefloxacin	C17H20FN3O3	CHEMBL1180337	C18H22FN3O3	1.362
DB00487	Pefloxacin	C17H20FN3O3	CHEMBL15089	C21H26FN3O3	1.359
DB00487	Pefloxacin	C17H20FN3O3	CHEMBL2417807	C22H20F2N4O5	1.359
DB00487	Pefloxacin	C17H20FN3O3	CHEMBL150654	C19H22FN3O3	1.973
DB00487	Pefloxacin	C17H20FN3O3	CHEMBL276516	C21H26FN3O3	1.35
DB00487	Pefloxacin	C17H20FN3O3	CHEMBL15322	C19H22FN3O3	1.349
DB00487	Pefloxacin	C17H20FN3O3	CHEMBL15335	C17H20FN3O3	1.347
DB00487	Pefloxacin	C17H20FN3O3	CHEMBL261939	C18H22FN3O3	1.341
DB00487	Pefloxacin	C17H20FN3O3	CHEMBL280036	C18H22FN3O3	1.332
DB00487	Pefloxacin	C17H20FN3O3	CHEMBL125840	C19H22FN3O3	1.328
DB00487	Pefloxacin	C17H20FN3O3	CHEMBL15371	C19H24FN3O3	1.327
DB00487	Pefloxacin	C17H20FN3O3	CHEMBL34586	C17H19F2N3O3	1.324
DB00487	Pefloxacin	C17H20FN3O3	CHEMBL15164	C19H24FN3O3	1.322
DB00487	Pefloxacin	C17H20FN3O3	CHEMBL62625	C19H22FN3O4	1.32
DB00487	Pefloxacin	C17H20FN3O3	CHEMBL62325	C19H24FN3O4	1.32
DB00487	Pefloxacin	C17H20FN3O3	CHEMBL160662	C18H18FN3O3	1.32
DB00487	Pefloxacin	C17H20FN3O3	CHEMBL14971	C18H22FN3O3	1.319
DB00487	Pefloxacin	C17H20FN3O3	CHEMBL739	C18H20FN3O4	1.313
DB00487	Pefloxacin	C17H20FN3O3	CHEMBL26141	C19H22FN3O3	1.31
DB00487	Pefloxacin	C17H20FN3O3	CHEMBL60778	C20H24FN3O4	1.31
DB00487	Pefloxacin	C17H20FN3O3	CHEMBL99269	C16H18FN3O4	1.31
DB00487	Pefloxacin	C17H20FN3O3	CHEMBL15417	C20H26FN3O3	1.31
DB00487	Pefloxacin	C17H20FN3O3	CHEMBL29479	C23H24FN3O3	1.298
DB00487	Pefloxacin	C17H20FN3O3	CHEMBL32672	C18H19F2N3O3	1.291
DB00487	Pefloxacin	C17H20FN3O3	CHEMBL157744	C20H22FN3O3	1.964
DB00487	Pefloxacin	C17H20FN3O3	CHEMBL26469	C23H25FN4O3	1.288
DB00487	Pefloxacin	C17H20FN3O3	CHEMBL282356	C16H18FN3O4	1.284
DB00487	Pefloxacin	C17H20FN3O3	CHEMBL29597	C18H22FN3O4	1.28
DB00487	Pefloxacin	C17H20FN3O3	CHEMBL99495	C17H18FN3O4	1.275
DB00487	Pefloxacin	C17H20FN3O3	CHEMBL25916	C19H24FN3O3	1.27
DB00487	Pefloxacin	C17H20FN3O3	CHEMBL735	C16H16FN3O4	1.26
DB00487	Pefloxacin	C17H20FN3O3	CHEMBL35662	C17H20FN3O4	1.255
DB00487	Pefloxacin	C17H20FN3O3	CHEMBL167009	C21H24FN3O4	1.255
DB00487	Pefloxacin	C17H20FN3O3	CHEMBL32069	C18H23FN4O3	1.249
DB00487	Pefloxacin	C17H20FN3O3	CHEMBL62316	C22H28FN3O4	1.239
DB00487	Pefloxacin	C17H20FN3O3	CHEMBL155792	C19H22FN3O3	1.963
DB00487	Pefloxacin	C17H20FN3O3	CHEMBL27029	C19H23F2N3O3	1.236
DB00487	Pefloxacin	C17H20FN3O3	CHEMBL291360	C21H26FN3O4	1.229
DB00487	Pefloxacin	C17H20FN3O3	CHEMBL63712	C35H37F2N5O3	1.226
DB00487	Pefloxacin	C17H20FN3O3	CHEMBL732	C16H18FN3O4	1.225
DB00487	Pefloxacin	C17H20FN3O3	CHEMBL26023	C20H24FN3O3	1.224
DB00487	Pefloxacin	C17H20FN3O3	CHEMBL418129	C20H24FN3O4	1.211
DB00487	Pefloxacin	C17H20FN3O3	CHEMBL160838	C19H20FN3O3	1.19
DB00487	Pefloxacin	C17H20FN3O3	CHEMBL123681	C23H25FN4O3	1.181
DB00487	Pefloxacin	C17H20FN3O3	CHEMBL29384	C21H20FN3O3	1.109
DB00487	Pefloxacin	C17H20FN3O3	CHEMBL134203	C16H18FN3O3	1.962
DB00487	Pefloxacin	C17H20FN3O3	CHEMBL192813	C16H18FN3O3	2.097
DB00487	Pefloxacin	C17H20FN3O3	CHEMBL253567	C19H24FN3O3	1.957
DB00487	Pefloxacin	C17H20FN3O3	CHEMBL109132	C20H22FN3O3	1.956
DB00487	Pefloxacin	C17H20FN3O3	CHEMBL131981	C17H18FN3O3	1.953
DB00487	Pefloxacin	C17H20FN3O3	CHEMBL334799	C19H22FN3O3	1.953
DB00487	Pefloxacin	C17H20FN3O3	CHEMBL336758	C16H16FN3O3	1.94
DB00487	Pefloxacin	C17H20FN3O3	CHEMBL358209	C18H20FN3O3	1.929
DB00487	Pefloxacin	C17H20FN3O3	CHEMBL351539	C19H22FN3O3	1.929
DB00487	Pefloxacin	C17H20FN3O3	CHEMBL497252	C21H26FN3O3	1.926
DB00487	Pefloxacin	C17H20FN3O3	CHEMBL360952	C17H19FN4O3	1.915
DB00487	Pefloxacin	C17H20FN3O3	CHEMBL155803	C17H18FN3O3	1.91
DB00487	Pefloxacin	C17H20FN3O3	CHEMBL15511	C19H22FN3O3	2.094
DB00487	Pefloxacin	C17H20FN3O3	CHEMBL1086529	C15H16FN3O3	1.91
DB00487	Pefloxacin	C17H20FN3O3	CHEMBL150947	C17H18FN3O3	1.908
DB00487	Pefloxacin	C17H20FN3O3	CHEMBL150998	C19H24FN3O3	1.895
DB00487	Pefloxacin	C17H20FN3O3	CHEMBL538983	C16H18ClF2N3O3	1.895
DB00487	Pefloxacin	C17H20FN3O3	CHEMBL151512	C19H22FN3O3	1.895
DB00487	Pefloxacin	C17H20FN3O3	CHEMBL15393	C16H19FN4O3	1.894
DB00487	Pefloxacin	C17H20FN3O3	CHEMBL544453	C17H21ClFN3O3	1.894
DB00487	Pefloxacin	C17H20FN3O3	CHEMBL16124	C17H19FN4O3	1.892
DB00487	Pefloxacin	C17H20FN3O3	CHEMBL276049	C18H21FN4O3	1.892
DB00487	Pefloxacin	C17H20FN3O3	CHEMBL335306	C16H18FN3O3	1.882
DB00487	Pefloxacin	C17H20FN3O3	CHEMBL6273	C17H18F3N3O3	2.084
DB00487	Pefloxacin	C17H20FN3O3	CHEMBL134977	C17H18FN3O3	1.88
DB00487	Pefloxacin	C17H20FN3O3	CHEMBL156432	C18H18FN3O3	1.877
DB00487	Pefloxacin	C17H20FN3O3	CHEMBL15815	C17H20FN3O3	1.876
DB00487	Pefloxacin	C17H20FN3O3	CHEMBL131621	C18H20FN3O3	1.868
DB00487	Pefloxacin	C17H20FN3O3	CHEMBL539232	C17H19ClFN3O3	1.866
DB00487	Pefloxacin	C17H20FN3O3	CHEMBL134762	C17H18FN3O3	1.866
DB00487	Pefloxacin	C17H20FN3O3	CHEMBL132967	C18H22FN3O3	1.862
DB00487	Pefloxacin	C17H20FN3O3	CHEMBL138366	C19H22FN3O3	1.862
DB00487	Pefloxacin	C17H20FN3O3	CHEMBL1761237	C18H21F2N3O3	1.862
DB00487	Pefloxacin	C17H20FN3O3	CHEMBL134542	C17H18FN3O3	1.861
DB00487	Pefloxacin	C17H20FN3O3	CHEMBL156592	C19H20FN3O3	2.082
DB00487	Pefloxacin	C17H20FN3O3	CHEMBL132434	C18H20FN3O3	1.86
DB00487	Pefloxacin	C17H20FN3O3	CHEMBL544927	C21H27ClFN3O3	1.856
DB00487	Pefloxacin	C17H20FN3O3	CHEMBL347489	C17H18FN3O3	1.85
DB00487	Pefloxacin	C17H20FN3O3	CHEMBL132141	C20H25FIN3O3	1.848
DB00487	Pefloxacin	C17H20FN3O3	CHEMBL440158	C18H20FN3O3	1.847
DB00487	Pefloxacin	C17H20FN3O3	CHEMBL135525	C18H19F2N3O3	1.839
DB00487	Pefloxacin	C17H20FN3O3	CHEMBL1406871	C17H19F2N3O3	1.836
DB00487	Pefloxacin	C17H20FN3O3	CHEMBL134352	C19H24FN3O3	1.836
DB00487	Pefloxacin	C17H20FN3O3	CHEMBL134469	C18H22FN3O3	1.835
DB00487	Pefloxacin	C17H20FN3O3	CHEMBL15438	C19H21F2N3O3	1.834
DB00487	Pefloxacin	C17H20FN3O3	CHEMBL371384	C19H24FN3O3	2.082
DB00487	Pefloxacin	C17H20FN3O3	CHEMBL15549	C17H17F2N3O3	1.831
DB00487	Pefloxacin	C17H20FN3O3	CHEMBL15613	C18H19F2N3O3	1.83
DB00487	Pefloxacin	C17H20FN3O3	CHEMBL16052	C18H20FN3O3	1.83
DB00487	Pefloxacin	C17H20FN3O3	CHEMBL553296	C18H23ClFN3O3	1.815
DB00487	Pefloxacin	C17H20FN3O3	CHEMBL2111892	C19H22FN3O3	1.814
DB00487	Pefloxacin	C17H20FN3O3	CHEMBL277523	C16H17F2N3O3	1.812
DB00487	Pefloxacin	C17H20FN3O3	CHEMBL15973	C18H21F2N3O3	1.812
DB00487	Pefloxacin	C17H20FN3O3	CHEMBL19927	C17H18FN3O3	1.805
DB00487	Pefloxacin	C17H20FN3O3	CHEMBL19760	C17H18FN3O3	1.805
DB00487	Pefloxacin	C17H20FN3O3	CHEMBL134336	C18H20FN3O3	2.07
DB00487	Pefloxacin	C17H20FN3O3	CHEMBL1359926	C21H28FN3O3	1.792
DB00487	Pefloxacin	C17H20FN3O3	CHEMBL132671	C18H20FN3O3	1.788
DB00487	Pefloxacin	C17H20FN3O3	CHEMBL228450	C18H20FN3O3	1.787
DB00487	Pefloxacin	C17H20FN3O3	CHEMBL134599	C18H20FN3O3	1.787
DB00487	Pefloxacin	C17H20FN3O3	CHEMBL414451	C20H24FN3O3	1.785
DB00487	Pefloxacin	C17H20FN3O3	CHEMBL355972	C18H21F2N3O3	1.785
DB00487	Pefloxacin	C17H20FN3O3	CHEMBL2323801	C18H20FN3O3	1.784
DB00487	Pefloxacin	C17H20FN3O3	CHEMBL2159994	C24H24FN3O3	1.782
DB00487	Pefloxacin	C17H20FN3O3	CHEMBL121399	C18H19F2N3O3	1.781
DB00487	Pefloxacin	C17H20FN3O3	CHEMBL309888	C17H20FN3O2	1.777
DB00487	Pefloxacin	C17H20FN3O3	CHEMBL110781	C20H22FN3O3	2.052
DB00487	Pefloxacin	C17H20FN3O3	CHEMBL542073	C15H17ClFN3O3	1.775
DB00487	Pefloxacin	C17H20FN3O3	CHEMBL740	C17H18FN3O4	1.771
DB00487	Pefloxacin	C17H20FN3O3	CHEMBL157548	C19H20FN3O3	1.77
DB00487	Pefloxacin	C17H20FN3O3	CHEMBL42878	C18H23FN2O3	1.764
DB00487	Pefloxacin	C17H20FN3O3	CHEMBL345559	C18H20FN3O3	1.764
DB00487	Pefloxacin	C17H20FN3O3	CHEMBL1532831	C19H22FN3O4	1.761
DB00487	Pefloxacin	C17H20FN3O3	CHEMBL2417809	C18H19ClFN3O4	1.753
DB00487	Pefloxacin	C17H20FN3O3	CHEMBL1834405	C18H18FN3O4	1.735
DB00487	Pefloxacin	C17H20FN3O3	CHEMBL1077975	C20H24FN3O6	1.732
DB00487	Pefloxacin	C17H20FN3O3	CHEMBL573543	C19H20FN3O4	1.727
DB00487	Pefloxacin	C17H20FN3O3	CHEMBL135001	C19H22FN3O3	2.051
DB00487	Pefloxacin	C17H20FN3O3	CHEMBL151030	C19H22FN3O3	1.716
DB00487	Pefloxacin	C17H20FN3O3	CHEMBL435853	C21H24FN3O3	1.714
DB00487	Pefloxacin	C17H20FN3O3	CHEMBL573348	C20H22FN3O4	1.712
DB00487	Pefloxacin	C17H20FN3O3	CHEMBL73691	C17H18FN3O2	1.701
DB00487	Pefloxacin	C17H20FN3O3	CHEMBL539496	C16H19ClFN3O3	1.692
DB00487	Pefloxacin	C17H20FN3O3	CHEMBL538466	C16H19ClFN3O4	1.675
DB00487	Pefloxacin	C17H20FN3O3	CHEMBL358676	C18H20FN3O3	1.664
DB00487	Pefloxacin	C17H20FN3O3	CHEMBL2417808	C22H22F2N4O3	1.663
DB00487	Pefloxacin	C17H20FN3O3	CHEMBL355987	C22H22FN3O3	1.647
DB00487	Pefloxacin	C17H20FN3O3	CHEMBL349330	C18H20FN3O3	2.044
DB00493	Cefotaxime	C16H17N5O7S2	CHEMBL1620635	C16H17N5O7S2	1.289
DB00493	Cefotaxime	C16H17N5O7S2	CHEMBL1622795	C16H17N5O7S2	1.17
DB00493	Cefotaxime	C16H17N5O7S2	CHEMBL2104178	C16H17N5O8S2	1.552
DB00493	Cefotaxime	C16H17N5O7S2	CHEMBL1620660	C16H17N5O7S2	1.526
DB00493	Cefotaxime	C16H17N5O7S2	CHEMBL355297	C14H15N5O6S2	1.452
DB00493	Cefotaxime	C16H17N5O7S2	CHEMBL2104469	C14H15N5O6S2	1.357
DB00493	Cefotaxime	C16H17N5O7S2	CHEMBL2115200	C17H17N5O9S2	1.329
DB00493	Cefotaxime	C16H17N5O7S2	CHEMBL2115204	C16H17N5O8S2	1.322
DB00493	Cefotaxime	C16H17N5O7S2	CHEMBL2114198	C16H17N5O8S2	1.322
DB00535	Cefdinir	C14H13N5O5S2	CHEMBL1317573	C16H15N5O7S2	1.993
DB00535	Cefdinir	C14H13N5O5S2	CHEMBL427069	C16H15N5O7S2	1.952
DB00535	Cefdinir	C14H13N5O5S2	CHEMBL1980844	C16H17N5O8S2	1.952
DB00535	Cefdinir	C14H13N5O5S2	CHEMBL70783	C14H13N5O5S2	1.939
DB00535	Cefdinir	C14H13N5O5S2	CHEMBL551654	C13H13N5O5S2	1.633
DB00535	Cefdinir	C14H13N5O5S2	CHEMBL2103764	C14H15N5O5S2	1.367
DB00535	Cefdinir	C14H13N5O5S2	CHEMBL60169	C14H14N4O4S2	1.07
DB00537	Ciprofloxacin	C17H18FN3O3	CHEMBL572618	C19H19ClFN3O4	1.644
DB00537	Ciprofloxacin	C17H18FN3O3	CHEMBL574481	C21H24FN3O4	1.643
DB00537	Ciprofloxacin	C17H18FN3O3	CHEMBL132141	C20H25FIN3O3	1.641
DB00537	Ciprofloxacin	C17H18FN3O3	CHEMBL157548	C19H20FN3O3	1.641
DB00537	Ciprofloxacin	C17H18FN3O3	CHEMBL583949	C19H20FN3O5	1.639
DB00537	Ciprofloxacin	C17H18FN3O3	CHEMBL283849	C17H19F2N3O3	1.627
DB00537	Ciprofloxacin	C17H18FN3O3	CHEMBL2159994	C24H24FN3O3	1.624
DB00537	Ciprofloxacin	C17H18FN3O3	CHEMBL320964	C22H21FN4O3	1.622
DB00537	Ciprofloxacin	C17H18FN3O3	CHEMBL2152314	C22H26FN3O4	1.603
DB00537	Ciprofloxacin	C17H18FN3O3	CHEMBL156432	C18H18FN3O3	2.121
DB00537	Ciprofloxacin	C17H18FN3O3	CHEMBL1631371	C22H21F2N3O3	1.584
DB00537	Ciprofloxacin	C17H18FN3O3	CHEMBL2417808	C22H22F2N4O3	1.578
DB00537	Ciprofloxacin	C17H18FN3O3	CHEMBL573315	C22H26FN3O4	1.573
DB00537	Ciprofloxacin	C17H18FN3O3	CHEMBL309888	C17H20FN3O2	1.572
DB00537	Ciprofloxacin	C17H18FN3O3	CHEMBL267648	C17H20FN3O3	1.552
DB00537	Ciprofloxacin	C17H18FN3O3	CHEMBL435853	C21H24FN3O3	1.542
DB00537	Ciprofloxacin	C17H18FN3O3	CHEMBL2104775	C18H28FN3O8S	1.532
DB00537	Ciprofloxacin	C17H18FN3O3	CHEMBL414451	C20H24FN3O3	1.529
DB00537	Ciprofloxacin	C17H18FN3O3	CHEMBL2152311	C23H28FN3O4	1.524
DB00537	Ciprofloxacin	C17H18FN3O3	CHEMBL1631366	C22H20F3N3O3	1.511
DB00537	Ciprofloxacin	C17H18FN3O3	CHEMBL138366	C19H22FN3O3	2.109
DB00537	Ciprofloxacin	C17H18FN3O3	CHEMBL2152310	C23H28FN3O4	1.499
DB00537	Ciprofloxacin	C17H18FN3O3	CHEMBL1204145	C17H21ClFN3O4	1.497
DB00537	Ciprofloxacin	C17H18FN3O3	CHEMBL1631368	C22H20F3N3O3	1.496
DB00537	Ciprofloxacin	C17H18FN3O3	CHEMBL1187301	C20H27FN3O5	1.492
DB00537	Ciprofloxacin	C17H18FN3O3	CHEMBL574037	C22H26FN3O4	1.49
DB00537	Ciprofloxacin	C17H18FN3O3	CHEMBL29597	C18H22FN3O4	1.48
DB00537	Ciprofloxacin	C17H18FN3O3	CHEMBL189394	C21H21FN4O3	1.475
DB00537	Ciprofloxacin	C17H18FN3O3	CHEMBL73577	C16H18FN3O2	1.469
DB00537	Ciprofloxacin	C17H18FN3O3	CHEMBL15531	C19H22FN3O3	1.464
DB00537	Ciprofloxacin	C17H18FN3O3	CHEMBL284890	C15H16FN3O3	1.462
DB00537	Ciprofloxacin	C17H18FN3O3	CHEMBL132434	C18H20FN3O3	2.106
DB00537	Ciprofloxacin	C17H18FN3O3	CHEMBL417530	C19H21F2N3O3	1.459
DB00537	Ciprofloxacin	C17H18FN3O3	CHEMBL282095	C17H18FN3O3	1.459
DB00537	Ciprofloxacin	C17H18FN3O3	CHEMBL108513	C21H26FN3O6	1.455
DB00537	Ciprofloxacin	C17H18FN3O3	CHEMBL2152315	C24H22FN3O4	1.449
DB00537	Ciprofloxacin	C17H18FN3O3	CHEMBL274050	C17H20FN3O3	1.438
DB00537	Ciprofloxacin	C17H18FN3O3	CHEMBL1428564	C18H24FN3O6S	1.435
DB00537	Ciprofloxacin	C17H18FN3O3	CHEMBL15387	C18H22FN3O3	1.428
DB00537	Ciprofloxacin	C17H18FN3O3	CHEMBL497251	C20H27BrFN3O5	1.427
DB00537	Ciprofloxacin	C17H18FN3O3	CHEMBL99269	C16H18FN3O4	1.427
DB00537	Ciprofloxacin	C17H18FN3O3	CHEMBL130064	C18H21FN4O3	1.423
DB00537	Ciprofloxacin	C17H18FN3O3	CHEMBL440158	C18H20FN3O3	2.1
DB00537	Ciprofloxacin	C17H18FN3O3	CHEMBL128404	C18H23FN4O3	1.422
DB00537	Ciprofloxacin	C17H18FN3O3	CHEMBL47255	C18H19F2N3O3	1.417
DB00537	Ciprofloxacin	C17H18FN3O3	CHEMBL27358	C23H22FN3O4	1.412
DB00537	Ciprofloxacin	C17H18FN3O3	CHEMBL15524	C16H18FN3O3	1.406
DB00537	Ciprofloxacin	C17H18FN3O3	CHEMBL15353	C18H20FN3O3	1.405
DB00537	Ciprofloxacin	C17H18FN3O3	CHEMBL15322	C19H22FN3O3	1.4
DB00537	Ciprofloxacin	C17H18FN3O3	CHEMBL15361	C18H20FN3O3	1.397
DB00537	Ciprofloxacin	C17H18FN3O3	CHEMBL35974	C18H20FN3O3	1.396
DB00537	Ciprofloxacin	C17H18FN3O3	CHEMBL274980	C19H22FN3O3	1.395
DB00537	Ciprofloxacin	C17H18FN3O3	CHEMBL345171	C19H20FN3O3	1.392
DB00537	Ciprofloxacin	C17H18FN3O3	CHEMBL134542	C17H18FN3O3	2.093
DB00537	Ciprofloxacin	C17H18FN3O3	CHEMBL14866	C20H24FN3O3	1.39
DB00537	Ciprofloxacin	C17H18FN3O3	CHEMBL99495	C17H18FN3O4	1.39
DB00537	Ciprofloxacin	C17H18FN3O3	CHEMBL15467	C18H22FN3O3	1.389
DB00537	Ciprofloxacin	C17H18FN3O3	CHEMBL736	C14H16FN3O3	1.388
DB00537	Ciprofloxacin	C17H18FN3O3	CHEMBL160662	C18H18FN3O3	1.371
DB00537	Ciprofloxacin	C17H18FN3O3	CHEMBL34586	C17H19F2N3O3	1.369
DB00537	Ciprofloxacin	C17H18FN3O3	CHEMBL273347	C17H20FN3O3	1.369
DB00537	Ciprofloxacin	C17H18FN3O3	CHEMBL325975	C17H17F2N3O3	1.367
DB00537	Ciprofloxacin	C17H18FN3O3	CHEMBL261939	C18H22FN3O3	1.366
DB00537	Ciprofloxacin	C17H18FN3O3	CHEMBL15087	C17H18FN3O3	1.364
DB00537	Ciprofloxacin	C17H18FN3O3	CHEMBL135630	C17H17F2N3O3	2.082
DB00537	Ciprofloxacin	C17H18FN3O3	CHEMBL15371	C19H24FN3O3	1.361
DB00537	Ciprofloxacin	C17H18FN3O3	CHEMBL14971	C18H22FN3O3	1.361
DB00537	Ciprofloxacin	C17H18FN3O3	CHEMBL15164	C19H24FN3O3	1.359
DB00537	Ciprofloxacin	C17H18FN3O3	CHEMBL15417	C20H26FN3O3	1.355
DB00537	Ciprofloxacin	C17H18FN3O3	CHEMBL15362	C20H24FN3O3	1.353
DB00537	Ciprofloxacin	C17H18FN3O3	CHEMBL131375	C18H19FN4O3	1.352
DB00537	Ciprofloxacin	C17H18FN3O3	CHEMBL1180337	C18H22FN3O3	1.349
DB00537	Ciprofloxacin	C17H18FN3O3	CHEMBL283890	C17H20FN3O3	1.348
DB00537	Ciprofloxacin	C17H18FN3O3	CHEMBL282867	C17H19F2N3O3	1.343
DB00537	Ciprofloxacin	C17H18FN3O3	CHEMBL125840	C19H22FN3O3	1.343
DB00537	Ciprofloxacin	C17H18FN3O3	CHEMBL345559	C18H20FN3O3	2.081
DB00537	Ciprofloxacin	C17H18FN3O3	CHEMBL2152312	C23H28FN3O4	1.343
DB00537	Ciprofloxacin	C17H18FN3O3	CHEMBL15148	C20H24FN3O3	1.341
DB00537	Ciprofloxacin	C17H18FN3O3	CHEMBL32672	C18H19F2N3O3	1.335
DB00537	Ciprofloxacin	C17H18FN3O3	CHEMBL282356	C16H18FN3O4	1.333
DB00537	Ciprofloxacin	C17H18FN3O3	CHEMBL67194	C29H34FN5O3	1.333
DB00537	Ciprofloxacin	C17H18FN3O3	CHEMBL15335	C17H20FN3O3	1.326
DB00537	Ciprofloxacin	C17H18FN3O3	CHEMBL29189	C19H22FN3O3	1.325
DB00537	Ciprofloxacin	C17H18FN3O3	CHEMBL116418	C18H19F2N3O3	1.323
DB00537	Ciprofloxacin	C17H18FN3O3	CHEMBL116788	C18H19F2N3O3	1.323
DB00537	Ciprofloxacin	C17H18FN3O3	CHEMBL280036	C18H22FN3O3	1.318
DB00537	Ciprofloxacin	C17H18FN3O3	CHEMBL131621	C18H20FN3O3	2.081
DB00537	Ciprofloxacin	C17H18FN3O3	CHEMBL275411	C19H24FN3O3	1.315
DB00537	Ciprofloxacin	C17H18FN3O3	CHEMBL26141	C19H22FN3O3	1.313
DB00537	Ciprofloxacin	C17H18FN3O3	CHEMBL739	C18H20FN3O4	1.308
DB00537	Ciprofloxacin	C17H18FN3O3	CHEMBL15350	C20H26FN3O3	1.306
DB00537	Ciprofloxacin	C17H18FN3O3	CHEMBL32069	C18H23FN4O3	1.301
DB00537	Ciprofloxacin	C17H18FN3O3	CHEMBL735	C16H16FN3O4	1.299
DB00537	Ciprofloxacin	C17H18FN3O3	CHEMBL27029	C19H23F2N3O3	1.292
DB00537	Ciprofloxacin	C17H18FN3O3	CHEMBL62325	C19H24FN3O4	1.292
DB00537	Ciprofloxacin	C17H18FN3O3	CHEMBL15089	C21H26FN3O3	1.291
DB00537	Ciprofloxacin	C17H18FN3O3	CHEMBL2417807	C22H20F2N4O5	1.288
DB00537	Ciprofloxacin	C17H18FN3O3	CHEMBL135525	C18H19F2N3O3	2.079
DB00537	Ciprofloxacin	C17H18FN3O3	CHEMBL276516	C21H26FN3O3	1.283
DB00537	Ciprofloxacin	C17H18FN3O3	CHEMBL131360	C21H29FN4O3	1.28
DB00537	Ciprofloxacin	C17H18FN3O3	CHEMBL159030	C20H22FN3O3	1.275
DB00537	Ciprofloxacin	C17H18FN3O3	CHEMBL26023	C20H24FN3O3	1.274
DB00537	Ciprofloxacin	C17H18FN3O3	CHEMBL732	C16H18FN3O4	1.26
DB00537	Ciprofloxacin	C17H18FN3O3	CHEMBL29479	C23H24FN3O3	1.24
DB00537	Ciprofloxacin	C17H18FN3O3	CHEMBL160838	C19H20FN3O3	1.238
DB00537	Ciprofloxacin	C17H18FN3O3	CHEMBL26469	C23H25FN4O3	1.229
DB00537	Ciprofloxacin	C17H18FN3O3	CHEMBL431484	C22H21FN4O3	1.222
DB00537	Ciprofloxacin	C17H18FN3O3	CHEMBL62625	C19H22FN3O4	1.207
DB00537	Ciprofloxacin	C17H18FN3O3	CHEMBL15549	C17H17F2N3O3	2.076
DB00537	Ciprofloxacin	C17H18FN3O3	CHEMBL358209	C18H20FN3O3	2.218
DB00537	Ciprofloxacin	C17H18FN3O3	CHEMBL60778	C20H24FN3O4	1.196
DB00537	Ciprofloxacin	C17H18FN3O3	CHEMBL29384	C21H20FN3O3	1.182
DB00537	Ciprofloxacin	C17H18FN3O3	CHEMBL167009	C21H24FN3O4	1.169
DB00537	Ciprofloxacin	C17H18FN3O3	CHEMBL63712	C35H37F2N5O3	1.133
DB00537	Ciprofloxacin	C17H18FN3O3	CHEMBL62316	C22H28FN3O4	1.126
DB00537	Ciprofloxacin	C17H18FN3O3	CHEMBL291360	C21H26FN3O4	1.124
DB00537	Ciprofloxacin	C17H18FN3O3	CHEMBL418129	C20H24FN3O4	1.1
DB00537	Ciprofloxacin	C17H18FN3O3	CHEMBL135021	C18H19F2N3O3	2.072
DB00537	Ciprofloxacin	C17H18FN3O3	CHEMBL15613	C18H19F2N3O3	2.07
DB00537	Ciprofloxacin	C17H18FN3O3	CHEMBL15438	C19H21F2N3O3	2.067
DB00537	Ciprofloxacin	C17H18FN3O3	CHEMBL134352	C19H24FN3O3	2.062
DB00537	Ciprofloxacin	C17H18FN3O3	CHEMBL15393	C16H19FN4O3	2.059
DB00537	Ciprofloxacin	C17H18FN3O3	CHEMBL1185618	C17H19FN4O3	2.057
DB00537	Ciprofloxacin	C17H18FN3O3	CHEMBL2111892	C19H22FN3O3	2.054
DB00537	Ciprofloxacin	C17H18FN3O3	CHEMBL544453	C17H21ClFN3O3	2.046
DB00537	Ciprofloxacin	C17H18FN3O3	CHEMBL538983	C16H18ClF2N3O3	2.045
DB00537	Ciprofloxacin	C17H18FN3O3	CHEMBL151512	C19H22FN3O3	2.196
DB00537	Ciprofloxacin	C17H18FN3O3	CHEMBL151030	C19H22FN3O3	2.041
DB00537	Ciprofloxacin	C17H18FN3O3	CHEMBL16052	C18H20FN3O3	2.036
DB00537	Ciprofloxacin	C17H18FN3O3	CHEMBL355972	C18H21F2N3O3	2.036
DB00537	Ciprofloxacin	C17H18FN3O3	CHEMBL121399	C18H19F2N3O3	2.027
DB00537	Ciprofloxacin	C17H18FN3O3	CHEMBL15815	C17H20FN3O3	2.026
DB00537	Ciprofloxacin	C17H18FN3O3	CHEMBL539232	C17H19ClFN3O3	2.022
DB00537	Ciprofloxacin	C17H18FN3O3	CHEMBL1086529	C15H16FN3O3	2.019
DB00537	Ciprofloxacin	C17H18FN3O3	CHEMBL131981	C17H18FN3O3	2.015
DB00537	Ciprofloxacin	C17H18FN3O3	CHEMBL336758	C16H16FN3O3	2.01
DB00537	Ciprofloxacin	C17H18FN3O3	CHEMBL228450	C18H20FN3O3	2
DB00537	Ciprofloxacin	C17H18FN3O3	CHEMBL360952	C17H19FN4O3	2.195
DB00537	Ciprofloxacin	C17H18FN3O3	CHEMBL1406871	C17H19F2N3O3	1.985
DB00537	Ciprofloxacin	C17H18FN3O3	CHEMBL134556	C18H19F2N3O3	1.985
DB00537	Ciprofloxacin	C17H18FN3O3	CHEMBL134599	C18H20FN3O3	1.98
DB00537	Ciprofloxacin	C17H18FN3O3	CHEMBL277523	C16H17F2N3O3	1.965
DB00537	Ciprofloxacin	C17H18FN3O3	CHEMBL335306	C16H18FN3O3	1.964
DB00537	Ciprofloxacin	C17H18FN3O3	CHEMBL338504	C18H20FN3O3	1.958
DB00537	Ciprofloxacin	C17H18FN3O3	CHEMBL155803	C17H18FN3O3	1.955
DB00537	Ciprofloxacin	C17H18FN3O3	CHEMBL358676	C18H20FN3O3	1.951
DB00537	Ciprofloxacin	C17H18FN3O3	CHEMBL15973	C18H21F2N3O3	1.951
DB00537	Ciprofloxacin	C17H18FN3O3	CHEMBL542073	C15H17ClFN3O3	1.941
DB00537	Ciprofloxacin	C17H18FN3O3	CHEMBL150998	C19H24FN3O3	2.172
DB00537	Ciprofloxacin	C17H18FN3O3	CHEMBL1077975	C20H24FN3O6	1.941
DB00537	Ciprofloxacin	C17H18FN3O3	CHEMBL134977	C17H18FN3O3	1.941
DB00537	Ciprofloxacin	C17H18FN3O3	CHEMBL15511	C19H22FN3O3	1.924
DB00537	Ciprofloxacin	C17H18FN3O3	CHEMBL134762	C17H18FN3O3	1.917
DB00537	Ciprofloxacin	C17H18FN3O3	CHEMBL134203	C16H18FN3O3	1.916
DB00537	Ciprofloxacin	C17H18FN3O3	CHEMBL132967	C18H22FN3O3	1.915
DB00537	Ciprofloxacin	C17H18FN3O3	CHEMBL371384	C19H24FN3O3	1.906
DB00537	Ciprofloxacin	C17H18FN3O3	CHEMBL134469	C18H22FN3O3	1.898
DB00537	Ciprofloxacin	C17H18FN3O3	CHEMBL134609	C18H19F2N3O3	1.898
DB00537	Ciprofloxacin	C17H18FN3O3	CHEMBL16124	C17H19FN4O3	2.153
DB00537	Ciprofloxacin	C17H18FN3O3	CHEMBL134336	C18H20FN3O3	1.897
DB00537	Ciprofloxacin	C17H18FN3O3	CHEMBL349330	C18H20FN3O3	1.896
DB00537	Ciprofloxacin	C17H18FN3O3	CHEMBL156592	C19H20FN3O3	1.89
DB00537	Ciprofloxacin	C17H18FN3O3	CHEMBL343603	C19H22FN3O3	1.881
DB00537	Ciprofloxacin	C17H18FN3O3	CHEMBL132470	C19H21F2N3O3	1.873
DB00537	Ciprofloxacin	C17H18FN3O3	CHEMBL135001	C19H22FN3O3	1.87
DB00537	Ciprofloxacin	C17H18FN3O3	CHEMBL110781	C20H22FN3O3	1.865
DB00537	Ciprofloxacin	C17H18FN3O3	CHEMBL356614	C24H28FN3O3	1.863
DB00537	Ciprofloxacin	C17H18FN3O3	CHEMBL192813	C16H18FN3O3	1.862
DB00537	Ciprofloxacin	C17H18FN3O3	CHEMBL19927	C17H18FN3O3	1.855
DB00537	Ciprofloxacin	C17H18FN3O3	CHEMBL276049	C18H21FN4O3	2.148
DB00537	Ciprofloxacin	C17H18FN3O3	CHEMBL19760	C17H18FN3O3	1.854
DB00537	Ciprofloxacin	C17H18FN3O3	CHEMBL540258	C19H25ClFN3O3	1.853
DB00537	Ciprofloxacin	C17H18FN3O3	CHEMBL2323801	C18H20FN3O3	1.841
DB00537	Ciprofloxacin	C17H18FN3O3	CHEMBL355987	C22H22FN3O3	1.837
DB00537	Ciprofloxacin	C17H18FN3O3	CHEMBL253567	C19H24FN3O3	1.83
DB00537	Ciprofloxacin	C17H18FN3O3	CHEMBL1180637	C20H24F2N3O3	1.828
DB00537	Ciprofloxacin	C17H18FN3O3	CHEMBL538466	C16H19ClFN3O4	1.826
DB00537	Ciprofloxacin	C17H18FN3O3	CHEMBL539496	C16H19ClFN3O3	1.824
DB00537	Ciprofloxacin	C17H18FN3O3	CHEMBL132671	C18H20FN3O3	1.819
DB00537	Ciprofloxacin	C17H18FN3O3	CHEMBL155792	C19H22FN3O3	1.818
DB00537	Ciprofloxacin	C17H18FN3O3	CHEMBL108986	C21H26FN3O3	1.816
DB00537	Ciprofloxacin	C17H18FN3O3	CHEMBL1180570	C20H25FN3O3	1.8
DB00537	Ciprofloxacin	C17H18FN3O3	CHEMBL160405	C20H22FN3O3	1.799
DB00537	Ciprofloxacin	C17H18FN3O3	CHEMBL109132	C20H22FN3O3	1.799
DB00537	Ciprofloxacin	C17H18FN3O3	CHEMBL422620	C19H21F2N3O3	1.791
DB00537	Ciprofloxacin	C17H18FN3O3	CHEMBL334799	C19H22FN3O3	1.78
DB00537	Ciprofloxacin	C17H18FN3O3	CHEMBL351539	C19H22FN3O3	1.779
DB00537	Ciprofloxacin	C17H18FN3O3	CHEMBL157744	C20H22FN3O3	1.775
DB00537	Ciprofloxacin	C17H18FN3O3	CHEMBL1761237	C18H21F2N3O3	1.764
DB00537	Ciprofloxacin	C17H18FN3O3	CHEMBL73691	C17H18FN3O2	1.762
DB00537	Ciprofloxacin	C17H18FN3O3	CHEMBL150654	C19H22FN3O3	2.124
DB00537	Ciprofloxacin	C17H18FN3O3	CHEMBL1834405	C18H18FN3O4	1.757
DB00537	Ciprofloxacin	C17H18FN3O3	CHEMBL1359926	C21H28FN3O3	1.75
DB00537	Ciprofloxacin	C17H18FN3O3	CHEMBL28519	C16H17F2N3O3	1.749
DB00537	Ciprofloxacin	C17H18FN3O3	CHEMBL29237	C17H20FN3O3	1.744
DB00537	Ciprofloxacin	C17H18FN3O3	CHEMBL573543	C19H20FN3O4	1.738
DB00537	Ciprofloxacin	C17H18FN3O3	CHEMBL573348	C20H22FN3O4	1.718
DB00537	Ciprofloxacin	C17H18FN3O3	CHEMBL740	C17H18FN3O4	1.715
DB00537	Ciprofloxacin	C17H18FN3O3	CHEMBL243233	C22H19F2N3O3	1.704
DB00537	Ciprofloxacin	C17H18FN3O3	CHEMBL1532831	C19H22FN3O4	1.694
DB00537	Ciprofloxacin	C17H18FN3O3	CHEMBL497252	C21H26FN3O3	1.678
DB00537	Ciprofloxacin	C17H18FN3O3	CHEMBL347489	C17H18FN3O3	2.123
DB00560	Tigecycline	C29H39N5O8	CHEMBL236878	C25H32N6O8	2.357
DB00560	Tigecycline	C29H39N5O8	CHEMBL236665	C25H31N5O8	2.343
DB00567	Cephalexin	C16H17N3O4S	CHEMBL1200366	C16H20ClN3O5S	1.809
DB00567	Cephalexin	C16H17N3O4S	CHEMBL1907803	C20H18ClN3O4S	1.802
DB00567	Cephalexin	C16H17N3O4S	CHEMBL1907805	C20H19N3O4S	1.78
DB00567	Cephalexin	C16H17N3O4S	CHEMBL1907808	C21H21N3O5S	1.754
DB00567	Cephalexin	C16H17N3O4S	CHEMBL1907798	C20H18ClN3O4S	1.747
DB00567	Cephalexin	C16H17N3O4S	CHEMBL1907800	C20H18ClN3O4S	1.739
DB00567	Cephalexin	C16H17N3O4S	CHEMBL6634	C16H17N3O4S	1.34
DB00567	Cephalexin	C16H17N3O4S	CHEMBL1520246	C16H17N3O5S	1.302
DB00567	Cephalexin	C16H17N3O4S	CHEMBL1496979	C16H17N3O4S	1.274
DB00567	Cephalexin	C16H17N3O4S	CHEMBL31293	C16H16N2O4S	2.151
DB00567	Cephalexin	C16H17N3O4S	CHEMBL1318280	C16H19N3O5S	1.274
DB00567	Cephalexin	C16H17N3O4S	CHEMBL44601	C16H18N4O4S	1.22
DB00567	Cephalexin	C16H17N3O4S	CHEMBL296091	C17H20N4O4S	1.191
DB00567	Cephalexin	C16H17N3O4S	CHEMBL60601	C15H14N2O4S	1.168
DB00567	Cephalexin	C16H17N3O4S	CHEMBL287590	C16H17N3O4S	1.016
DB00567	Cephalexin	C16H17N3O4S	CHEMBL443543	C16H16N2O5S	2.13
DB00567	Cephalexin	C16H17N3O4S	CHEMBL1509369	C17H16N2O4S	2.071
DB00567	Cephalexin	C16H17N3O4S	CHEMBL116951	C17H16N2O4S	2.069
DB00567	Cephalexin	C16H17N3O4S	CHEMBL1555813	C16H17N3O5S	1.969
DB00567	Cephalexin	C16H17N3O4S	CHEMBL115860	C16H16N2O4S	1.874
DB00567	Cephalexin	C16H17N3O4S	CHEMBL1907801	C20H19N3O4S	1.858
DB00567	Cephalexin	C16H17N3O4S	CHEMBL18540	C17H17N3O5S	1.829
DB00576	Sulfamethizole	C9H10N4O2S2	CHEMBL450117	C11H14N4O2S2	2.104
DB00576	Sulfamethizole	C9H10N4O2S2	CHEMBL1355299	C10H12N4O2S2	1.515
DB00576	Sulfamethizole	C9H10N4O2S2	CHEMBL94087	C12H16N4O2S2	1.385
DB00582	Voriconazole	C16H14F3N5O	CHEMBL303329	C16H14F3N5O	1.601
DB00582	Voriconazole	C16H14F3N5O	CHEMBL418466	C16H14ClF2N5O	1.596
DB00582	Voriconazole	C16H14F3N5O	CHEMBL292479	C16H15F2N5O	1.519
DB00595	Oxytetracycline	C22H24N2O9	CHEMBL198	C22H24N2O8	2.016
DB00595	Oxytetracycline	C22H24N2O9	CHEMBL2111305	C22H26N2O9	2.012
DB00595	Oxytetracycline	C22H24N2O9	CHEMBL1475999	C22H25ClN2O9	2.008
DB00595	Oxytetracycline	C22H24N2O9	CHEMBL1950577	C22H25ClN2O8	2.008
DB00595	Oxytetracycline	C22H24N2O9	CHEMBL1398237	C22H28N2O11	2.006
DB00595	Oxytetracycline	C22H24N2O9	CHEMBL1256723	C22H25ClN2O8	1.975
DB00595	Oxytetracycline	C22H24N2O9	CHEMBL1623588	C21H21ClN2O8	1.971
DB00595	Oxytetracycline	C22H24N2O9	CHEMBL1620916	C21H21ClN2O8	1.971
DB00595	Oxytetracycline	C22H24N2O9	CHEMBL1414452	C21H21ClN2O8	2.116
DB00595	Oxytetracycline	C22H24N2O9	CHEMBL1485984	C22H24N2O8	1.956
DB00595	Oxytetracycline	C22H24N2O9	CHEMBL242074	C23H27IN2O8	1.954
DB00595	Oxytetracycline	C22H24N2O9	CHEMBL1616378	C22H23ClN2O8	1.938
DB00595	Oxytetracycline	C22H24N2O9	CHEMBL1475495	C22H23ClN2O8	1.938
DB00595	Oxytetracycline	C22H24N2O9	CHEMBL2008596	C27H33N3O10	1.904
DB00595	Oxytetracycline	C22H24N2O9	CHEMBL1562925	C22H25ClN2O8	1.892
DB00595	Oxytetracycline	C22H24N2O9	CHEMBL1354256	C22H24Cl2N2O8	1.879
DB00595	Oxytetracycline	C22H24N2O9	CHEMBL1619512	C22H24N2O9	2.086
DB00595	Oxytetracycline	C22H24N2O9	CHEMBL1512321	C22H24N2O8	1.878
DB00595	Oxytetracycline	C22H24N2O9	CHEMBL1443580	C22H24N2O8	1.878
DB00595	Oxytetracycline	C22H24N2O9	CHEMBL1625081	C22H24N2O8	1.878
DB00595	Oxytetracycline	C22H24N2O9	CHEMBL1620664	C22H24N2O8	1.878
DB00595	Oxytetracycline	C22H24N2O9	CHEMBL1532053	C21H22Cl2N2O8	1.847
DB00595	Oxytetracycline	C22H24N2O9	CHEMBL1450620	C21H22Cl2N2O8	1.847
DB00595	Oxytetracycline	C22H24N2O9	CHEMBL1616405	C22H24N2O8	1.838
DB00595	Oxytetracycline	C22H24N2O9	CHEMBL1372176	C22H24N2O8	1.838
DB00595	Oxytetracycline	C22H24N2O9	CHEMBL2009312	C21H22N2O7	1.824
DB00595	Oxytetracycline	C22H24N2O9	CHEMBL1354435	C22H24N2O9	2.086
DB00595	Oxytetracycline	C22H24N2O9	CHEMBL1624566	C22H24N2O8	1.806
DB00595	Oxytetracycline	C22H24N2O9	CHEMBL1356352	C22H25ClN2O8	1.785
DB00595	Oxytetracycline	C22H24N2O9	CHEMBL1441971	C27H33N3O8	1.785
DB00595	Oxytetracycline	C22H24N2O9	CHEMBL2010387	C27H33N3O8	1.785
DB00595	Oxytetracycline	C22H24N2O9	CHEMBL1514090	C27H33N3O8	1.785
DB00595	Oxytetracycline	C22H24N2O9	CHEMBL1968980	C21H23ClN2O7	1.771
DB00595	Oxytetracycline	C22H24N2O9	CHEMBL1999395	C27H34ClN3O8	1.736
DB00595	Oxytetracycline	C22H24N2O9	CHEMBL1783656	C25H24N2O7	1.713
DB00595	Oxytetracycline	C22H24N2O9	CHEMBL1622849	C22H24N2O9	2.086
DB00595	Oxytetracycline	C22H24N2O9	CHEMBL1574167	C22H25ClN2O8	1.711
DB00595	Oxytetracycline	C22H24N2O9	CHEMBL1437974	C23H28N2O11S	1.708
DB00595	Oxytetracycline	C22H24N2O9	CHEMBL1237046	C27H33N3O8	1.669
DB00595	Oxytetracycline	C22H24N2O9	CHEMBL1236180	C22H24N2O8	1.601
DB00595	Oxytetracycline	C22H24N2O9	CHEMBL2106517	C21H22N2O8	1.311
DB00595	Oxytetracycline	C22H24N2O9	CHEMBL2447928	C42H54N2O10	1.265
DB00595	Oxytetracycline	C22H24N2O9	CHEMBL2103929	C29H38N4O10	1.16
DB00595	Oxytetracycline	C22H24N2O9	CHEMBL1182529	C23H27N2O8	2.065
DB00595	Oxytetracycline	C22H24N2O9	CHEMBL1182528	C23H27N2O8	2.061
DB00595	Oxytetracycline	C22H24N2O9	CHEMBL1963084	C22H23ClN2O8	2.06
DB00595	Oxytetracycline	C22H24N2O9	CHEMBL242073	C23H27IN2O8	2.06
DB00595	Oxytetracycline	C22H24N2O9	CHEMBL1950580	C22H24Cl2N2O8	2.053
DB00607	Nafcillin	C21H22N2O5S	CHEMBL1626346	C17H20N2O6S	2.59
DB00607	Nafcillin	C21H22N2O5S	CHEMBL84001	C17H20N2O6S	2.004
DB00618	Demeclocycline	C21H21ClN2O8	CHEMBL1616378	C22H23ClN2O8	2.116
DB00618	Demeclocycline	C21H21ClN2O8	CHEMBL1475495	C22H23ClN2O8	2.116
DB00618	Demeclocycline	C21H21ClN2O8	CHEMBL242073	C23H27IN2O8	2.068
DB00618	Demeclocycline	C21H21ClN2O8	CHEMBL1354256	C22H24Cl2N2O8	2.038
DB00618	Demeclocycline	C21H21ClN2O8	CHEMBL1485984	C22H24N2O8	2.032
DB00618	Demeclocycline	C21H21ClN2O8	CHEMBL1450620	C21H22Cl2N2O8	2.003
DB00618	Demeclocycline	C21H21ClN2O8	CHEMBL1532053	C21H22Cl2N2O8	2.003
DB00618	Demeclocycline	C21H21ClN2O8	CHEMBL1562925	C22H25ClN2O8	1.965
DB00618	Demeclocycline	C21H21ClN2O8	CHEMBL1414452	C21H21ClN2O8	2.296
DB00618	Demeclocycline	C21H21ClN2O8	CHEMBL1625081	C22H24N2O8	1.959
DB00618	Demeclocycline	C21H21ClN2O8	CHEMBL1620664	C22H24N2O8	1.959
DB00618	Demeclocycline	C21H21ClN2O8	CHEMBL1443580	C22H24N2O8	1.959
DB00618	Demeclocycline	C21H21ClN2O8	CHEMBL1512321	C22H24N2O8	1.959
DB00618	Demeclocycline	C21H21ClN2O8	CHEMBL2106071	C23H25ClN2O9	1.942
DB00618	Demeclocycline	C21H21ClN2O8	CHEMBL1619512	C22H24N2O9	1.933
DB00618	Demeclocycline	C21H21ClN2O8	CHEMBL1622849	C22H24N2O9	1.933
DB00618	Demeclocycline	C21H21ClN2O8	CHEMBL1354435	C22H24N2O9	1.933
DB00618	Demeclocycline	C21H21ClN2O8	CHEMBL1782483	C25H22ClFN2O7	1.894
DB00618	Demeclocycline	C21H21ClN2O8	CHEMBL198	C22H24N2O8	2.263
DB00618	Demeclocycline	C21H21ClN2O8	CHEMBL2106006	C22H25ClN2O12S	1.886
DB00618	Demeclocycline	C21H21ClN2O8	CHEMBL1475999	C22H25ClN2O9	1.873
DB00618	Demeclocycline	C21H21ClN2O8	CHEMBL1398237	C22H28N2O11	1.859
DB00618	Demeclocycline	C21H21ClN2O8	CHEMBL1892210	C22H28N2O11	1.859
DB00618	Demeclocycline	C21H21ClN2O8	CHEMBL1783290	C29H30ClN3O7	1.848
DB00618	Demeclocycline	C21H21ClN2O8	CHEMBL1437974	C23H28N2O11S	1.776
DB00618	Demeclocycline	C21H21ClN2O8	CHEMBL1236180	C22H24N2O8	1.772
DB00618	Demeclocycline	C21H21ClN2O8	CHEMBL1182528	C23H27N2O8	2.235
DB00618	Demeclocycline	C21H21ClN2O8	CHEMBL2106517	C21H22N2O8	1.406
DB00618	Demeclocycline	C21H21ClN2O8	CHEMBL1950580	C22H24Cl2N2O8	2.231
DB00618	Demeclocycline	C21H21ClN2O8	CHEMBL1950577	C22H25ClN2O8	2.226
DB00618	Demeclocycline	C21H21ClN2O8	CHEMBL1963084	C22H23ClN2O8	2.14
DB00618	Demeclocycline	C21H21ClN2O8	CHEMBL1620916	C21H21ClN2O8	2.138
DB00618	Demeclocycline	C21H21ClN2O8	CHEMBL1623588	C21H21ClN2O8	2.138
DB00671	Cefixime	C16H15N5O7S2	CHEMBL1317573	C16H15N5O7S2	2.598
DB00671	Cefixime	C16H15N5O7S2	CHEMBL70783	C14H13N5O5S2	2.083
DB00671	Cefixime	C16H15N5O7S2	CHEMBL427069	C16H15N5O7S2	2.012
DB00684	Tobramycin	C18H37N5O9	CHEMBL389029	C29H55N5O18	1.01
DB00684	Tobramycin	C18H37N5O9	CHEMBL2431712	C30H62N4O6	1.006
DB00684	Tobramycin	C18H37N5O9	CHEMBL1741729	C25H50N6O13	1.006
DB00684	Tobramycin	C18H37N5O9	CHEMBL194646	C18H36N4O9	1.006
DB00684	Tobramycin	C18H37N5O9	CHEMBL372626	C18H37N5O9	1.001
DB00684	Tobramycin	C18H37N5O9	CHEMBL1487860	C18H36N4O11	1.401
DB00684	Tobramycin	C18H37N5O9	CHEMBL1486384	C18H36N4O11	1.401
DB00684	Tobramycin	C18H37N5O9	CHEMBL1623920	C18H36N4O11	1.401
DB00684	Tobramycin	C18H37N5O9	CHEMBL2368386	C19H42Cl4N4O12	1.393
DB00684	Tobramycin	C18H37N5O9	CHEMBL3040332	C18H36N4O11	1.392
DB00684	Tobramycin	C18H37N5O9	CHEMBL2008763	C20H40N4O10	1.392
DB00684	Tobramycin	C18H37N5O9	CHEMBL1617486	C17H34N4O10	1.39
DB00684	Tobramycin	C18H37N5O9	CHEMBL1481003	C17H34N4O10	1.383
DB00684	Tobramycin	C18H37N5O9	CHEMBL2333424	C18H37N5O10	1.36
DB00684	Tobramycin	C18H37N5O9	CHEMBL215226	C20H40N4O10	1.515
DB00684	Tobramycin	C18H37N5O9	CHEMBL367060	C12H26N4O6	1.349
DB00684	Tobramycin	C18H37N5O9	CHEMBL2333426	C18H37N5O10	1.345
DB00684	Tobramycin	C18H37N5O9	CHEMBL1182203	C17H33N3O11	1.327
DB00684	Tobramycin	C18H37N5O9	CHEMBL2303743	C18H36N4O10	1.316
DB00684	Tobramycin	C18H37N5O9	CHEMBL1182228	C17H34N4O10	1.315
DB00684	Tobramycin	C18H37N5O9	CHEMBL1178386	C18H37N5O7	1.301
DB00684	Tobramycin	C18H37N5O9	CHEMBL38377	C19H39N5O11	1.299
DB00684	Tobramycin	C18H37N5O9	CHEMBL474967	C17H34N4O10	1.293
DB00684	Tobramycin	C18H37N5O9	CHEMBL1512386	C18H38N4O15S	1.288
DB00684	Tobramycin	C18H37N5O9	CHEMBL598581	C18H36N4O9	1.489
DB00684	Tobramycin	C18H37N5O9	CHEMBL2368385	C19H42Cl4N4O11	1.277
DB00684	Tobramycin	C18H37N5O9	CHEMBL2333427	C18H37N5O10	1.276
DB00684	Tobramycin	C18H37N5O9	CHEMBL192058	C18H37N5O7	1.273
DB00684	Tobramycin	C18H37N5O9	CHEMBL384124	C19H39N5O7	1.267
DB00684	Tobramycin	C18H37N5O9	CHEMBL2368384	C18H40Cl4N4O11	1.262
DB00684	Tobramycin	C18H37N5O9	CHEMBL3039996	C18H37N5O10	1.253
DB00684	Tobramycin	C18H37N5O9	CHEMBL3039862	C19H39N5O7	1.248
DB00684	Tobramycin	C18H37N5O9	CHEMBL2333428	C18H36N4O8	1.235
DB00684	Tobramycin	C18H37N5O9	CHEMBL1620897	C20H40N4O10	1.233
DB00684	Tobramycin	C18H37N5O9	CHEMBL427409	C12H26N4O6	1.231
DB00684	Tobramycin	C18H37N5O9	CHEMBL3039778	C18H36N4O10	1.228
DB00684	Tobramycin	C18H37N5O9	CHEMBL2333425	C18H38N6O9	1.227
DB00684	Tobramycin	C18H37N5O9	CHEMBL1624185	C18H37N5O8	1.22
DB00684	Tobramycin	C18H37N5O9	CHEMBL1403353	C18H37N5O9	1.219
DB00684	Tobramycin	C18H37N5O9	CHEMBL1314828	C18H37N5O9	1.219
DB00684	Tobramycin	C18H37N5O9	CHEMBL598583	C18H37N5O7	1.217
DB00684	Tobramycin	C18H37N5O9	CHEMBL605966	C17H35N5O7	1.217
DB00684	Tobramycin	C18H37N5O9	CHEMBL1165271	C13H27N3O7	1.205
DB00684	Tobramycin	C18H37N5O9	CHEMBL2373954	C19H38N4O9	1.187
DB00684	Tobramycin	C18H37N5O9	CHEMBL333529	C19H39N5O8	1.181
DB00684	Tobramycin	C18H37N5O9	CHEMBL3039857	C19H38N4O12	1.441
DB00684	Tobramycin	C18H37N5O9	CHEMBL431061	C12H25N3O7	1.177
DB00684	Tobramycin	C18H37N5O9	CHEMBL220884	C20H41N5O7	1.175
DB00684	Tobramycin	C18H37N5O9	CHEMBL338328	C18H37N5O7	1.172
DB00684	Tobramycin	C18H37N5O9	CHEMBL339199	C19H38N4O8	1.171
DB00684	Tobramycin	C18H37N5O9	CHEMBL599188	C18H37N5O7	1.17
DB00684	Tobramycin	C18H37N5O9	CHEMBL194346	C18H36N4O10	1.169
DB00684	Tobramycin	C18H37N5O9	CHEMBL2303624	C18H36N4O11	1.167
DB00684	Tobramycin	C18H37N5O9	CHEMBL125216	C19H39N5O7	1.167
DB00684	Tobramycin	C18H37N5O9	CHEMBL2368628	C18H41Cl4N5O10	1.16
DB00684	Tobramycin	C18H37N5O9	CHEMBL1184885	C12H26N4O6	1.159
DB00684	Tobramycin	C18H37N5O9	CHEMBL223520	C18H36N4O11	1.439
DB00684	Tobramycin	C18H37N5O9	CHEMBL1395097	C23H45N5O14	1.158
DB00684	Tobramycin	C18H37N5O9	CHEMBL1623060	C23H45N5O14	1.149
DB00684	Tobramycin	C18H37N5O9	CHEMBL1624130	C23H45N5O14	1.149
DB00684	Tobramycin	C18H37N5O9	CHEMBL1322152	C23H45N5O14	1.149
DB00684	Tobramycin	C18H37N5O9	CHEMBL1533156	C23H45N5O14	1.149
DB00684	Tobramycin	C18H37N5O9	CHEMBL2368383	C18H40Cl4N4O10	1.148
DB00684	Tobramycin	C18H37N5O9	CHEMBL125594	C18H36N4O8	1.147
DB00684	Tobramycin	C18H37N5O9	CHEMBL340026	C19H39N5O8	1.136
DB00684	Tobramycin	C18H37N5O9	CHEMBL1331937	C18H37N5O10	1.432
DB00684	Tobramycin	C18H37N5O9	CHEMBL197693	C17H34N4O10	1.131
DB00684	Tobramycin	C18H37N5O9	CHEMBL2034990	C23H45N5O10	1.128
DB00684	Tobramycin	C18H37N5O9	CHEMBL34949	C21H43N5O8	1.123
DB00684	Tobramycin	C18H37N5O9	CHEMBL606551	C23H44N4O15	1.122
DB00684	Tobramycin	C18H37N5O9	CHEMBL431478	C19H40N6O7	1.122
DB00684	Tobramycin	C18H37N5O9	CHEMBL301721	C19H39N5O7	1.113
DB00684	Tobramycin	C18H37N5O9	CHEMBL332423	C19H40N6O7	1.11
DB00684	Tobramycin	C18H37N5O9	CHEMBL1162918	C21H43N5O11	1.11
DB00684	Tobramycin	C18H37N5O9	CHEMBL374667	C12H26N4O4	1.11
DB00684	Tobramycin	C18H37N5O9	CHEMBL125064	C18H37N5O7	1.109
DB00684	Tobramycin	C18H37N5O9	CHEMBL2333423	C18H36N4O11	1.409
DB00684	Tobramycin	C18H37N5O9	CHEMBL121785	C19H39N5O8	1.104
DB00684	Tobramycin	C18H37N5O9	CHEMBL1288865	C23H45N5O12	1.101
DB00684	Tobramycin	C18H37N5O9	CHEMBL122034	C19H40N6O7	1.101
DB00684	Tobramycin	C18H37N5O9	CHEMBL122030	C19H40N6O7	1.099
DB00684	Tobramycin	C18H37N5O9	CHEMBL1559527	C18H39N5O12S	1.09
DB00684	Tobramycin	C18H37N5O9	CHEMBL606552	C12H25N3O7	1.079
DB00684	Tobramycin	C18H37N5O9	CHEMBL339602	C19H40N6O7	1.061
DB00684	Tobramycin	C18H37N5O9	CHEMBL1184867	C17H34N4O10	1.05
DB00684	Tobramycin	C18H37N5O9	CHEMBL196111	C21H44N6O10	1.048
DB00684	Tobramycin	C18H37N5O9	CHEMBL387934	C17H33N3O11	1.042
DB00684	Tobramycin	C18H37N5O9	CHEMBL3040076	C19H38N4O11	1.405
DB00684	Tobramycin	C18H37N5O9	CHEMBL288690	C18H38N6O9	1.038
DB00684	Tobramycin	C18H37N5O9	CHEMBL370180	C21H43N5O11	1.033
DB00684	Tobramycin	C18H37N5O9	CHEMBL35509	C18H37N5O9	1.033
DB00684	Tobramycin	C18H37N5O9	CHEMBL500813	C23H46N6O13	1.03
DB00684	Tobramycin	C18H37N5O9	CHEMBL402786	C23H46N6O13	1.029
DB00684	Tobramycin	C18H37N5O9	CHEMBL1184880	C17H33N3O11	1.021
DB00684	Tobramycin	C18H37N5O9	CHEMBL2431745	C20H42N4O6	1.014
DB00684	Tobramycin	C18H37N5O9	CHEMBL2431746	C24H50N4O6	1.012
DB00684	Tobramycin	C18H37N5O9	CHEMBL264546	C19H38N4O11	1.012
DB00684	Tobramycin	C18H37N5O9	CHEMBL35238	C19H39N5O10	1.01
DB00684	Tobramycin	C18H37N5O9	CHEMBL598582	C18H36N4O9	1.402
DB00689	Cephaloglycin	C18H19N3O6S	CHEMBL31212	C18H18N2O6S	1.99
DB00689	Cephaloglycin	C18H19N3O6S	CHEMBL133011	C18H18N2O7S	1.589
DB00689	Cephaloglycin	C18H19N3O6S	CHEMBL1700858	C18H18N2O6S	1.573
DB00689	Cephaloglycin	C18H19N3O6S	CHEMBL1703138	C22H26N2O6S	1.222
DB00689	Cephaloglycin	C18H19N3O6S	CHEMBL46515	C18H20N4O6S	1.074
DB00689	Cephaloglycin	C18H19N3O6S	CHEMBL415921	C19H22N4O6S	1.057
DB00689	Cephaloglycin	C18H19N3O6S	CHEMBL1615646	C18H18N2O7S	1.571
DB00698	Nitrofurantoin	C8H6N4O5	CHEMBL1515795	C8H6N4O5	1.876
DB00713	Oxacillin	C19H19N3O5S	CHEMBL1741055	C19H19N3O7S	1.351
DB00713	Oxacillin	C19H19N3O5S	CHEMBL24174	C20H20ClN3O5S	1.24
DB00713	Oxacillin	C19H19N3O5S	CHEMBL1624192	C19H18ClN3O5S	2.702
DB00713	Oxacillin	C19H19N3O5S	CHEMBL1623166	C19H18ClN3O5S	2.695
DB00713	Oxacillin	C19H19N3O5S	CHEMBL1616891	C19H17Cl2N3O5S	2.525
DB00713	Oxacillin	C19H19N3O5S	CHEMBL1622721	C19H17Cl2N3O5S	2.525
DB00713	Oxacillin	C19H19N3O5S	CHEMBL276972	C19H19N3O6S	1.678
DB00713	Oxacillin	C19H19N3O5S	CHEMBL281444	C20H21N3O5S	1.379
DB00730	Thiabendazole	C10H7N3S	CHEMBL370420	C10H8N4S	1.97
DB00759	Tetracycline	C22H24N2O8	CHEMBL1950580	C22H24Cl2N2O8	2.083
DB00759	Tetracycline	C22H24N2O8	CHEMBL1443580	C22H24N2O8	2.041
DB00759	Tetracycline	C22H24N2O8	CHEMBL1625081	C22H24N2O8	2.041
DB00759	Tetracycline	C22H24N2O8	CHEMBL1620664	C22H24N2O8	2.041
DB00759	Tetracycline	C22H24N2O8	CHEMBL1512321	C22H24N2O8	2.041
DB00759	Tetracycline	C22H24N2O8	CHEMBL242073	C23H27IN2O8	2.038
DB00759	Tetracycline	C22H24N2O8	CHEMBL1562925	C22H25ClN2O8	2.031
DB00759	Tetracycline	C22H24N2O8	CHEMBL1623588	C21H21ClN2O8	2.016
DB00759	Tetracycline	C22H24N2O8	CHEMBL1620916	C21H21ClN2O8	2.016
DB00759	Tetracycline	C22H24N2O8	CHEMBL1414452	C21H21ClN2O8	2.162
DB00759	Tetracycline	C22H24N2O8	CHEMBL1326554	C29H38N4O10	2
DB00759	Tetracycline	C22H24N2O8	CHEMBL2008596	C27H33N3O10	1.989
DB00759	Tetracycline	C22H24N2O8	CHEMBL1354256	C22H24Cl2N2O8	1.98
DB00759	Tetracycline	C22H24N2O8	CHEMBL1783660	C27H29N3O7	1.972
DB00759	Tetracycline	C22H24N2O8	CHEMBL1783656	C25H24N2O7	1.941
DB00759	Tetracycline	C22H24N2O8	CHEMBL1782493	C25H25N3O7	1.931
DB00759	Tetracycline	C22H24N2O8	CHEMBL1441971	C27H33N3O8	1.914
DB00759	Tetracycline	C22H24N2O8	CHEMBL2010387	C27H33N3O8	1.914
DB00759	Tetracycline	C22H24N2O8	CHEMBL1514090	C27H33N3O8	1.914
DB00759	Tetracycline	C22H24N2O8	CHEMBL1532053	C21H22Cl2N2O8	1.91
DB00759	Tetracycline	C22H24N2O8	CHEMBL198	C22H24N2O8	2.14
DB00759	Tetracycline	C22H24N2O8	CHEMBL1450620	C21H22Cl2N2O8	1.91
DB00759	Tetracycline	C22H24N2O8	CHEMBL1782489	C25H25N3O7	1.906
DB00759	Tetracycline	C22H24N2O8	CHEMBL2009312	C21H22N2O7	1.89
DB00759	Tetracycline	C22H24N2O8	CHEMBL1968980	C21H23ClN2O7	1.876
DB00759	Tetracycline	C22H24N2O8	CHEMBL1783664	C28H31N3O7	1.875
DB00759	Tetracycline	C22H24N2O8	CHEMBL1782482	C25H23FN2O7	1.87
DB00759	Tetracycline	C22H24N2O8	CHEMBL1619512	C22H24N2O9	1.857
DB00759	Tetracycline	C22H24N2O8	CHEMBL1622849	C22H24N2O9	1.857
DB00759	Tetracycline	C22H24N2O8	CHEMBL1354435	C22H24N2O9	1.857
DB00759	Tetracycline	C22H24N2O8	CHEMBL1182528	C23H27N2O8	2.14
DB00759	Tetracycline	C22H24N2O8	CHEMBL1999395	C27H34ClN3O8	1.855
DB00759	Tetracycline	C22H24N2O8	CHEMBL1182529	C23H27N2O8	1.845
DB00759	Tetracycline	C22H24N2O8	CHEMBL1437974	C23H28N2O11S	1.836
DB00759	Tetracycline	C22H24N2O8	CHEMBL1782486	C29H31N3O7	1.83
DB00759	Tetracycline	C22H24N2O8	CHEMBL1475999	C22H25ClN2O9	1.803
DB00759	Tetracycline	C22H24N2O8	CHEMBL1398237	C22H28N2O11	1.798
DB00759	Tetracycline	C22H24N2O8	CHEMBL1892210	C22H28N2O11	1.798
DB00759	Tetracycline	C22H24N2O8	CHEMBL1782487	C28H31N3O7	1.784
DB00759	Tetracycline	C22H24N2O8	CHEMBL1256723	C22H25ClN2O8	1.77
DB00759	Tetracycline	C22H24N2O8	CHEMBL1237046	C27H33N3O8	1.751
DB00759	Tetracycline	C22H24N2O8	CHEMBL242074	C23H27IN2O8	1.748
DB00759	Tetracycline	C22H24N2O8	CHEMBL1783657	C31H28N2O7	1.728
DB00759	Tetracycline	C22H24N2O8	CHEMBL1574167	C22H25ClN2O8	1.721
DB00759	Tetracycline	C22H24N2O8	CHEMBL1616405	C22H24N2O8	1.651
DB00759	Tetracycline	C22H24N2O8	CHEMBL1963084	C22H23ClN2O8	2.117
DB00759	Tetracycline	C22H24N2O8	CHEMBL1372176	C22H24N2O8	1.651
DB00759	Tetracycline	C22H24N2O8	CHEMBL1624566	C22H24N2O8	1.65
DB00759	Tetracycline	C22H24N2O8	CHEMBL2106006	C22H25ClN2O12S	1.635
DB00759	Tetracycline	C22H24N2O8	CHEMBL1236180	C22H24N2O8	1.633
DB00759	Tetracycline	C22H24N2O8	CHEMBL1356352	C22H25ClN2O8	1.614
DB00759	Tetracycline	C22H24N2O8	CHEMBL2105868	C27H34N4O11	1.375
DB00759	Tetracycline	C22H24N2O8	CHEMBL2447928	C42H54N2O10	1.154
DB00759	Tetracycline	C22H24N2O8	CHEMBL2103929	C29H38N4O10	1.13
DB00759	Tetracycline	C22H24N2O8	CHEMBL1485984	C22H24N2O8	2.107
DB00759	Tetracycline	C22H24N2O8	CHEMBL1950577	C22H25ClN2O8	2.104
DB00759	Tetracycline	C22H24N2O8	CHEMBL1616378	C22H23ClN2O8	2.095
DB00759	Tetracycline	C22H24N2O8	CHEMBL1475495	C22H23ClN2O8	2.095
DB00778	Roxithromycin	C41H76N2O15	CHEMBL1671888	C41H76N2O15	1.714
DB00778	Roxithromycin	C41H76N2O15	CHEMBL1214185	C41H76N2O15	1.579
DB00778	Roxithromycin	C41H76N2O15	CHEMBL1774286	C38H70N2O13	1.494
DB00778	Roxithromycin	C41H76N2O15	CHEMBL2368026	C33H60N2O12	1.168
DB00778	Roxithromycin	C41H76N2O15	CHEMBL1512198	C41H76N2O15	1.07
DB00778	Roxithromycin	C41H76N2O15	CHEMBL2106397	C38H70N2O13	1.057
DB00798	Gentamicin	C21H43N5O7	CHEMBL1178386	C18H37N5O7	1.088
DB00798	Gentamicin	C21H43N5O7	CHEMBL125718	C21H43N5O6	1.031
DB00798	Gentamicin	C21H43N5O7	CHEMBL3039862	C19H39N5O7	1.023
DB00798	Gentamicin	C21H43N5O7	CHEMBL220884	C20H41N5O7	1.832
DB00798	Gentamicin	C21H43N5O7	CHEMBL384124	C19H39N5O7	1.705
DB00798	Gentamicin	C21H43N5O7	CHEMBL1620897	C20H40N4O10	1.532
DB00798	Gentamicin	C21H43N5O7	CHEMBL1741743	C21H41N5O11	1.291
DB00798	Gentamicin	C21H43N5O7	CHEMBL195892	C21H43N5O7	1.277
DB00798	Gentamicin	C21H43N5O7	CHEMBL2110604	C19H38N4O10	1.193
DB00798	Gentamicin	C21H43N5O7	CHEMBL1434645	C21H41N5O11	1.152
DB00798	Gentamicin	C21H43N5O7	CHEMBL1909452	C21H41N5O11	1.143
DB00798	Gentamicin	C21H43N5O7	CHEMBL34949	C21H43N5O8	1.123
DB00817	Rosoxacin	C17H14N2O3	CHEMBL288437	C13H13NO3	1.715
DB00833	Cefaclor	C15H14ClN3O4S	CHEMBL302873	C15H13ClN2O5S	1.229
DB00833	Cefaclor	C15H14ClN3O4S	CHEMBL60607	C15H12Cl2N2O4S	1.224
DB00833	Cefaclor	C15H14ClN3O4S	CHEMBL294820	C16H15ClN2O5S	1.211
DB00833	Cefaclor	C15H14ClN3O4S	CHEMBL61866	C17H17ClN2O6S	1.108
DB00833	Cefaclor	C15H14ClN3O4S	CHEMBL8867	C15H14ClN3O4S	1.547
DB00833	Cefaclor	C15H14ClN3O4S	CHEMBL1361297	C15H14ClN3O4S	1.334
DB00833	Cefaclor	C15H14ClN3O4S	CHEMBL1357252	C15H16ClN3O5S	1.333
DB00833	Cefaclor	C15H14ClN3O4S	CHEMBL296744	C15H15ClN4O4S	1.292
DB00833	Cefaclor	C15H14ClN3O4S	CHEMBL293958	C15H13ClN2O4S	1.285
DB00833	Cefaclor	C15H14ClN3O4S	CHEMBL59499	C15H14ClN3O4S	1.268
DB00833	Cefaclor	C15H14ClN3O4S	CHEMBL60252	C16H15ClN2O5S	1.233
DB00833	Cefaclor	C15H14ClN3O4S	CHEMBL59281	C15H12ClFN2O4S	1.231
DB00845	Clofazimine	C27H22Cl2N4	CHEMBL346176	C28H24Cl2N4O	1.974
DB00845	Clofazimine	C27H22Cl2N4	CHEMBL153312	C29H27Cl2N5	1.944
DB00845	Clofazimine	C27H22Cl2N4	CHEMBL153194	C29H27Cl2N5	1.932
DB00845	Clofazimine	C27H22Cl2N4	CHEMBL152474	C30H29Cl2N5	1.929
DB00845	Clofazimine	C27H22Cl2N4	CHEMBL348666	C30H29Cl2N5	1.917
DB00845	Clofazimine	C27H22Cl2N4	CHEMBL423957	C29H27Cl2N5	1.916
DB00845	Clofazimine	C27H22Cl2N4	CHEMBL423227	C26H20Cl2N4O	1.913
DB00845	Clofazimine	C27H22Cl2N4	CHEMBL154105	C27H22Cl2N4O	1.91
DB00845	Clofazimine	C27H22Cl2N4	CHEMBL152430	C27H24N4	1.903
DB00845	Clofazimine	C27H22Cl2N4	CHEMBL262254	C31H31Cl2N5	1.9
DB00845	Clofazimine	C27H22Cl2N4	CHEMBL155446	C30H29Cl2N5	1.882
DB00845	Clofazimine	C27H22Cl2N4	CHEMBL152431	C26H22N4	1.87
DB00845	Clofazimine	C27H22Cl2N4	CHEMBL2002139	C29H26Cl2N4	1.486
DB00845	Clofazimine	C27H22Cl2N4	CHEMBL154405	C28H24Cl2N4	2.007
DB00845	Clofazimine	C27H22Cl2N4	CHEMBL152456	C25H18Cl2N4	2.003
DB00845	Clofazimine	C27H22Cl2N4	CHEMBL154379	C29H27Cl2N5	1.975
DB00845	Clofazimine	C27H22Cl2N4	CHEMBL153888	C31H28Cl2N4	1.957
DB00845	Clofazimine	C27H22Cl2N4	CHEMBL434662	C29H24Cl2N4	2.069
DB00845	Clofazimine	C27H22Cl2N4	CHEMBL154163	C31H28Cl2N4	1.857
DB00845	Clofazimine	C27H22Cl2N4	CHEMBL422348	C27H22Cl2N4	2.064
DB00845	Clofazimine	C27H22Cl2N4	CHEMBL346337	C29H26Cl2N4	2.045
DB00845	Clofazimine	C27H22Cl2N4	CHEMBL348094	C30H26Cl2N4	2.045
DB00845	Clofazimine	C27H22Cl2N4	CHEMBL153835	C28H25Cl2N5	2.042
DB00845	Clofazimine	C27H22Cl2N4	CHEMBL357963	C27H23Cl2N5	2.019
DB00845	Clofazimine	C27H22Cl2N4	CHEMBL440182	C29H26Cl2N4	2.016
DB00845	Clofazimine	C27H22Cl2N4	CHEMBL152012	C28H25Cl2N5	2.007
DB00845	Clofazimine	C27H22Cl2N4	CHEMBL156713	C28H24Cl2N4	2.005
DB00845	Clofazimine	C27H22Cl2N4	CHEMBL157266	C31H28Cl2N4	2.017
DB00919	Spectinomycin	C14H24N2O7	CHEMBL1366668	C14H24N2O7	1.988
DB00919	Spectinomycin	C14H24N2O7	CHEMBL1972663	C14H25ClN2O7	1.877
DB00919	Spectinomycin	C14H24N2O7	CHEMBL1443447	C14H27ClN2O8	1.877
DB00919	Spectinomycin	C14H24N2O7	CHEMBL1614655	C17H30N2O7	1.823
DB00919	Spectinomycin	C14H24N2O7	CHEMBL1969020	C14H26N2O11S	1.627
DB00919	Spectinomycin	C14H24N2O7	CHEMBL1615351	C17H32N2O11S	1.121
DB00955	Netilmicin	C21H41N5O7	CHEMBL2105403	C19H37N5O7	1.413
DB00955	Netilmicin	C21H41N5O7	CHEMBL1592218	C19H37N5O7	1.198
DB00955	Netilmicin	C21H41N5O7	CHEMBL115339	C19H37N5O7	1.191
DB00955	Netilmicin	C21H41N5O7	CHEMBL221886	C19H37N5O7	1.148
DB00955	Netilmicin	C21H41N5O7	CHEMBL1276545	C22H43N5O7	1.105
DB00978	Lomefloxacin	C17H19F2N3O3	CHEMBL417530	C19H21F2N3O3	1.527
DB00978	Lomefloxacin	C17H19F2N3O3	CHEMBL29237	C17H20FN3O3	1.525
DB00978	Lomefloxacin	C17H19F2N3O3	CHEMBL277099	C16H17F2N3O3	1.507
DB00978	Lomefloxacin	C17H19F2N3O3	CHEMBL354595	C20H21F2N3O3	1.493
DB00978	Lomefloxacin	C17H19F2N3O3	CHEMBL267648	C17H20FN3O3	1.493
DB00978	Lomefloxacin	C17H19F2N3O3	CHEMBL160661	C18H17F2N3O3	1.491
DB00978	Lomefloxacin	C17H19F2N3O3	CHEMBL440744	C18H19F2N3O3	1.479
DB00978	Lomefloxacin	C17H19F2N3O3	CHEMBL47255	C18H19F2N3O3	1.476
DB00978	Lomefloxacin	C17H19F2N3O3	CHEMBL32833	C17H17F4N3O3	1.476
DB00978	Lomefloxacin	C17H19F2N3O3	CHEMBL440333	C17H16F3N3O3	1.474
DB00978	Lomefloxacin	C17H19F2N3O3	CHEMBL15973	C18H21F2N3O3	2.105
DB00978	Lomefloxacin	C17H19F2N3O3	CHEMBL431857	C18H18F3N3O3	1.473
DB00978	Lomefloxacin	C17H19F2N3O3	CHEMBL435838	C19H19F2N3O3	1.469
DB00978	Lomefloxacin	C17H19F2N3O3	CHEMBL74011	C20H21F2N3O3	1.465
DB00978	Lomefloxacin	C17H19F2N3O3	CHEMBL297992	C19H22F2N4O3	1.459
DB00978	Lomefloxacin	C17H19F2N3O3	CHEMBL348879	C20H21F2N3O3	1.458
DB00978	Lomefloxacin	C17H19F2N3O3	CHEMBL295635	C18H20F2N4O3	1.456
DB00978	Lomefloxacin	C17H19F2N3O3	CHEMBL295106	C18H20F2N4O3	1.456
DB00978	Lomefloxacin	C17H19F2N3O3	CHEMBL42068	C19H22F2N4O3	1.442
DB00978	Lomefloxacin	C17H19F2N3O3	CHEMBL116446	C18H18F3N3O3	1.426
DB00978	Lomefloxacin	C17H19F2N3O3	CHEMBL47209	C18H18F3N3O3	1.421
DB00978	Lomefloxacin	C17H19F2N3O3	CHEMBL277523	C16H17F2N3O3	2.104
DB00978	Lomefloxacin	C17H19F2N3O3	CHEMBL282867	C17H19F2N3O3	1.413
DB00978	Lomefloxacin	C17H19F2N3O3	CHEMBL15531	C19H22FN3O3	1.401
DB00978	Lomefloxacin	C17H19F2N3O3	CHEMBL159024	C19H19F2N3O3	1.401
DB00978	Lomefloxacin	C17H19F2N3O3	CHEMBL43379	C19H22F2N4O3	1.398
DB00978	Lomefloxacin	C17H19F2N3O3	CHEMBL47028	C18H20F2N4O3	1.397
DB00978	Lomefloxacin	C17H19F2N3O3	CHEMBL46454	C20H24F2N4O3	1.396
DB00978	Lomefloxacin	C17H19F2N3O3	CHEMBL274050	C17H20FN3O3	1.392
DB00978	Lomefloxacin	C17H19F2N3O3	CHEMBL15387	C18H22FN3O3	1.387
DB00978	Lomefloxacin	C17H19F2N3O3	CHEMBL128404	C18H23FN4O3	1.379
DB00978	Lomefloxacin	C17H19F2N3O3	CHEMBL274980	C19H22FN3O3	1.374
DB00978	Lomefloxacin	C17H19F2N3O3	CHEMBL15608	C17H20F2N4O3	2.098
DB00978	Lomefloxacin	C17H19F2N3O3	CHEMBL233642	C30H27F2N3O3	1.373
DB00978	Lomefloxacin	C17H19F2N3O3	CHEMBL27029	C19H23F2N3O3	1.373
DB00978	Lomefloxacin	C17H19F2N3O3	CHEMBL15361	C18H20FN3O3	1.369
DB00978	Lomefloxacin	C17H19F2N3O3	CHEMBL14866	C20H24FN3O3	1.364
DB00978	Lomefloxacin	C17H19F2N3O3	CHEMBL15353	C18H20FN3O3	1.363
DB00978	Lomefloxacin	C17H19F2N3O3	CHEMBL73180	C19H21F2N3O3	1.363
DB00978	Lomefloxacin	C17H19F2N3O3	CHEMBL352000	C20H21F2N3O3	1.358
DB00978	Lomefloxacin	C17H19F2N3O3	CHEMBL34586	C17H19F2N3O3	1.356
DB00978	Lomefloxacin	C17H19F2N3O3	CHEMBL15322	C19H22FN3O3	1.353
DB00978	Lomefloxacin	C17H19F2N3O3	CHEMBL15467	C18H22FN3O3	1.349
DB00978	Lomefloxacin	C17H19F2N3O3	CHEMBL15707	C18H20F2N4O3	2.098
DB00978	Lomefloxacin	C17H19F2N3O3	CHEMBL273347	C17H20FN3O3	1.321
DB00978	Lomefloxacin	C17H19F2N3O3	CHEMBL15371	C19H24FN3O3	1.321
DB00978	Lomefloxacin	C17H19F2N3O3	CHEMBL261939	C18H22FN3O3	1.32
DB00978	Lomefloxacin	C17H19F2N3O3	CHEMBL15164	C19H24FN3O3	1.317
DB00978	Lomefloxacin	C17H19F2N3O3	CHEMBL15362	C20H24FN3O3	1.313
DB00978	Lomefloxacin	C17H19F2N3O3	CHEMBL429961	C18H20FN3O3	1.312
DB00978	Lomefloxacin	C17H19F2N3O3	CHEMBL15148	C20H24FN3O3	1.312
DB00978	Lomefloxacin	C17H19F2N3O3	CHEMBL14971	C18H22FN3O3	1.311
DB00978	Lomefloxacin	C17H19F2N3O3	CHEMBL62325	C19H24FN3O4	1.311
DB00978	Lomefloxacin	C17H19F2N3O3	CHEMBL15417	C20H26FN3O3	1.31
DB00978	Lomefloxacin	C17H19F2N3O3	CHEMBL15151	C18H22F2N4O3	2.093
DB00978	Lomefloxacin	C17H19F2N3O3	CHEMBL275411	C19H24FN3O3	1.278
DB00978	Lomefloxacin	C17H19F2N3O3	CHEMBL15350	C20H26FN3O3	1.263
DB00978	Lomefloxacin	C17H19F2N3O3	CHEMBL131360	C21H29FN4O3	1.257
DB00978	Lomefloxacin	C17H19F2N3O3	CHEMBL15089	C21H26FN3O3	1.256
DB00978	Lomefloxacin	C17H19F2N3O3	CHEMBL276516	C21H26FN3O3	1.251
DB00978	Lomefloxacin	C17H19F2N3O3	CHEMBL62625	C19H22FN3O4	1.227
DB00978	Lomefloxacin	C17H19F2N3O3	CHEMBL80202	C24H23F2N3O4	1.153
DB00978	Lomefloxacin	C17H19F2N3O3	CHEMBL274469	C17H18F2N4O3	2.091
DB00978	Lomefloxacin	C17H19F2N3O3	CHEMBL15518	C16H18F2N4O3	2.091
DB00978	Lomefloxacin	C17H19F2N3O3	CHEMBL121399	C18H19F2N3O3	2.091
DB00978	Lomefloxacin	C17H19F2N3O3	CHEMBL150654	C19H22FN3O3	2.079
DB00978	Lomefloxacin	C17H19F2N3O3	CHEMBL277169	C17H17F2N3O3	2.072
DB00978	Lomefloxacin	C17H19F2N3O3	CHEMBL15613	C18H19F2N3O3	2.157
DB00978	Lomefloxacin	C17H19F2N3O3	CHEMBL150998	C19H24FN3O3	2.049
DB00978	Lomefloxacin	C17H19F2N3O3	CHEMBL15273	C19H22F2N4O3	2.045
DB00978	Lomefloxacin	C17H19F2N3O3	CHEMBL358209	C18H20FN3O3	2.035
DB00978	Lomefloxacin	C17H19F2N3O3	CHEMBL19821	C17H17F2N3O3	2.034
DB00978	Lomefloxacin	C17H19F2N3O3	CHEMBL334785	C16H15F2N3O3	2.032
DB00978	Lomefloxacin	C17H19F2N3O3	CHEMBL134556	C18H19F2N3O3	2.026
DB00978	Lomefloxacin	C17H19F2N3O3	CHEMBL345559	C18H20FN3O3	2.015
DB00978	Lomefloxacin	C17H19F2N3O3	CHEMBL336806	C18H19F2N3O3	2.013
DB00978	Lomefloxacin	C17H19F2N3O3	CHEMBL15438	C19H21F2N3O3	2.155
DB00978	Lomefloxacin	C17H19F2N3O3	CHEMBL19793	C16H17F2N3O3	2.009
DB00978	Lomefloxacin	C17H19F2N3O3	CHEMBL19751	C16H17F2N3O3	2.009
DB00978	Lomefloxacin	C17H19F2N3O3	CHEMBL6273	C17H18F3N3O3	2.008
DB00978	Lomefloxacin	C17H19F2N3O3	CHEMBL16030	C19H21F2N3O3	2.007
DB00978	Lomefloxacin	C17H19F2N3O3	CHEMBL91659	C17H17F2N3O4	1.996
DB00978	Lomefloxacin	C17H19F2N3O3	CHEMBL322319	C20H21F2N3O3	1.993
DB00978	Lomefloxacin	C17H19F2N3O3	CHEMBL109031	C20H21F2N3O3	1.992
DB00978	Lomefloxacin	C17H19F2N3O3	CHEMBL133556	C17H17F2N3O3	1.99
DB00978	Lomefloxacin	C17H19F2N3O3	CHEMBL544453	C17H21ClFN3O3	1.979
DB00978	Lomefloxacin	C17H19F2N3O3	CHEMBL142520	C18H19F2N3O3	1.978
DB00978	Lomefloxacin	C17H19F2N3O3	CHEMBL15549	C17H17F2N3O3	2.149
DB00978	Lomefloxacin	C17H19F2N3O3	CHEMBL138366	C19H22FN3O3	1.971
DB00978	Lomefloxacin	C17H19F2N3O3	CHEMBL331076	C18H19F2N3O3	1.958
DB00978	Lomefloxacin	C17H19F2N3O3	CHEMBL413117	C17H17F2N3O3	1.955
DB00978	Lomefloxacin	C17H19F2N3O3	CHEMBL539496	C16H19ClFN3O3	1.952
DB00978	Lomefloxacin	C17H19F2N3O3	CHEMBL51067	C17H17F2N3O3	1.951
DB00978	Lomefloxacin	C17H19F2N3O3	CHEMBL51403	C17H17F2N3O3	1.951
DB00978	Lomefloxacin	C17H19F2N3O3	CHEMBL554488	C18H19F2N3O3	1.948
DB00978	Lomefloxacin	C17H19F2N3O3	CHEMBL132434	C18H20FN3O3	1.945
DB00978	Lomefloxacin	C17H19F2N3O3	CHEMBL358676	C18H20FN3O3	1.94
DB00978	Lomefloxacin	C17H19F2N3O3	CHEMBL134609	C18H19F2N3O3	1.94
DB00978	Lomefloxacin	C17H19F2N3O3	CHEMBL440158	C18H20FN3O3	1.936
DB00978	Lomefloxacin	C17H19F2N3O3	CHEMBL132470	C19H21F2N3O3	1.935
DB00978	Lomefloxacin	C17H19F2N3O3	CHEMBL336999	C16H17F2N3O3	1.928
DB00978	Lomefloxacin	C17H19F2N3O3	CHEMBL156098	C19H19F2N3O3	1.927
DB00978	Lomefloxacin	C17H19F2N3O3	CHEMBL134374	C16H17F2N3O3	1.917
DB00978	Lomefloxacin	C17H19F2N3O3	CHEMBL327326	C18H19F2N3O4	1.917
DB00978	Lomefloxacin	C17H19F2N3O3	CHEMBL134301	C18H21F2N3O3	1.916
DB00978	Lomefloxacin	C17H19F2N3O3	CHEMBL277699	C17H17F2N3O3	1.914
DB00978	Lomefloxacin	C17H19F2N3O3	CHEMBL2111892	C19H22FN3O3	1.912
DB00978	Lomefloxacin	C17H19F2N3O3	CHEMBL135630	C17H17F2N3O3	2.136
DB00978	Lomefloxacin	C17H19F2N3O3	CHEMBL124058	C18H19F2N3O3	1.912
DB00978	Lomefloxacin	C17H19F2N3O3	CHEMBL1761237	C18H21F2N3O3	1.906
DB00978	Lomefloxacin	C17H19F2N3O3	CHEMBL1180637	C20H24F2N3O3	1.889
DB00978	Lomefloxacin	C17H19F2N3O3	CHEMBL334997	C18H19F2N3O3	1.874
DB00978	Lomefloxacin	C17H19F2N3O3	CHEMBL122698	C20H23F2N3O3	1.857
DB00978	Lomefloxacin	C17H19F2N3O3	CHEMBL1761242	C15H16F2N2O3	1.857
DB00978	Lomefloxacin	C17H19F2N3O3	CHEMBL157855	C19H20F3N3O3	1.85
DB00978	Lomefloxacin	C17H19F2N3O3	CHEMBL349784	C20H21F2N3O3	1.846
DB00978	Lomefloxacin	C17H19F2N3O3	CHEMBL422620	C19H21F2N3O3	1.839
DB00978	Lomefloxacin	C17H19F2N3O3	CHEMBL327193	C19H21F2N3O4	1.838
DB00978	Lomefloxacin	C17H19F2N3O3	CHEMBL135021	C18H19F2N3O3	2.135
DB00978	Lomefloxacin	C17H19F2N3O3	CHEMBL156705	C20H21F2N3O3	1.829
DB00978	Lomefloxacin	C17H19F2N3O3	CHEMBL157085	C19H21F2N3O3	1.825
DB00978	Lomefloxacin	C17H19F2N3O3	CHEMBL15511	C19H22FN3O3	1.817
DB00978	Lomefloxacin	C17H19F2N3O3	CHEMBL158125	C19H21F2N3O3	1.812
DB00978	Lomefloxacin	C17H19F2N3O3	CHEMBL371384	C19H24FN3O3	1.803
DB00978	Lomefloxacin	C17H19F2N3O3	CHEMBL253567	C19H24FN3O3	1.797
DB00978	Lomefloxacin	C17H19F2N3O3	CHEMBL115967	C18H18F3N3O3	1.794
DB00978	Lomefloxacin	C17H19F2N3O3	CHEMBL155792	C19H22FN3O3	1.783
DB00978	Lomefloxacin	C17H19F2N3O3	CHEMBL110781	C20H22FN3O3	1.778
DB00978	Lomefloxacin	C17H19F2N3O3	CHEMBL540258	C19H25ClFN3O3	1.768
DB00978	Lomefloxacin	C17H19F2N3O3	CHEMBL135525	C18H19F2N3O3	2.132
DB00978	Lomefloxacin	C17H19F2N3O3	CHEMBL243233	C22H19F2N3O3	1.762
DB00978	Lomefloxacin	C17H19F2N3O3	CHEMBL135844	C20H24F2IN3O3	1.754
DB00978	Lomefloxacin	C17H19F2N3O3	CHEMBL108986	C21H26FN3O3	1.739
DB00978	Lomefloxacin	C17H19F2N3O3	CHEMBL336865	C18H21F2N3O3	1.729
DB00978	Lomefloxacin	C17H19F2N3O3	CHEMBL1631371	C22H21F2N3O3	1.716
DB00978	Lomefloxacin	C17H19F2N3O3	CHEMBL289781	C19H22F2N4O3	1.714
DB00978	Lomefloxacin	C17H19F2N3O3	CHEMBL1180570	C20H25FN3O3	1.71
DB00978	Lomefloxacin	C17H19F2N3O3	CHEMBL132471	C16H16F3N3O3	1.697
DB00978	Lomefloxacin	C17H19F2N3O3	CHEMBL2106827	C18H23F2N3O6S	1.681
DB00978	Lomefloxacin	C17H19F2N3O3	CHEMBL390051	C23H21F2N3O3	1.667
DB00978	Lomefloxacin	C17H19F2N3O3	CHEMBL348354	C18H17F2N3O3	2.128
DB00978	Lomefloxacin	C17H19F2N3O3	CHEMBL497252	C21H26FN3O3	1.652
DB00978	Lomefloxacin	C17H19F2N3O3	CHEMBL1631366	C22H20F3N3O3	1.634
DB00978	Lomefloxacin	C17H19F2N3O3	CHEMBL1631370	C23H23F2N3O3	1.634
DB00978	Lomefloxacin	C17H19F2N3O3	CHEMBL1631368	C22H20F3N3O3	1.624
DB00978	Lomefloxacin	C17H19F2N3O3	CHEMBL46558	C18H20F2N4O3	1.59
DB00978	Lomefloxacin	C17H19F2N3O3	CHEMBL297597	C19H22F2N4O3	1.585
DB00978	Lomefloxacin	C17H19F2N3O3	CHEMBL132141	C20H25FIN3O3	1.581
DB00978	Lomefloxacin	C17H19F2N3O3	CHEMBL15464	C17H17F2N3O3	1.568
DB00978	Lomefloxacin	C17H19F2N3O3	CHEMBL320964	C22H21FN4O3	1.567
DB00978	Lomefloxacin	C17H19F2N3O3	CHEMBL2417808	C22H22F2N4O3	1.565
DB00978	Lomefloxacin	C17H19F2N3O3	CHEMBL355972	C18H21F2N3O3	2.116
DB00994	Neomycin	C23H46N6O13	CHEMBL3039996	C18H37N5O10	1.403
DB00994	Neomycin	C23H46N6O13	CHEMBL1533156	C23H45N5O14	1.401
DB00994	Neomycin	C23H46N6O13	CHEMBL1623060	C23H45N5O14	1.401
DB00994	Neomycin	C23H46N6O13	CHEMBL1624130	C23H45N5O14	1.401
DB00994	Neomycin	C23H46N6O13	CHEMBL1322152	C23H45N5O14	1.401
DB00994	Neomycin	C23H46N6O13	CHEMBL3040076	C19H38N4O11	1.391
DB00994	Neomycin	C23H46N6O13	CHEMBL606551	C23H44N4O15	1.386
DB00994	Neomycin	C23H46N6O13	CHEMBL1481003	C17H34N4O10	1.378
DB00994	Neomycin	C23H46N6O13	CHEMBL2333424	C18H37N5O10	1.377
DB00994	Neomycin	C23H46N6O13	CHEMBL1617486	C17H34N4O10	1.374
DB00994	Neomycin	C23H46N6O13	CHEMBL2333427	C18H37N5O10	1.37
DB00994	Neomycin	C23H46N6O13	CHEMBL227649	C27H54N6O14	1.365
DB00994	Neomycin	C23H46N6O13	CHEMBL2368386	C19H42Cl4N4O12	1.357
DB00994	Neomycin	C23H46N6O13	CHEMBL3039778	C18H36N4O10	1.355
DB00994	Neomycin	C23H46N6O13	CHEMBL2333423	C18H36N4O11	1.338
DB00994	Neomycin	C23H46N6O13	CHEMBL2368384	C18H40Cl4N4O11	1.333
DB00994	Neomycin	C23H46N6O13	CHEMBL228152	C25H49N5O15	1.332
DB00994	Neomycin	C23H46N6O13	CHEMBL2034990	C23H45N5O10	1.32
DB00994	Neomycin	C23H46N6O13	CHEMBL474967	C17H34N4O10	1.297
DB00994	Neomycin	C23H46N6O13	CHEMBL1288865	C23H45N5O12	1.295
DB00994	Neomycin	C23H46N6O13	CHEMBL402786	C23H46N6O13	1.291
DB00994	Neomycin	C23H46N6O13	CHEMBL2368385	C19H42Cl4N4O11	1.288
DB00994	Neomycin	C23H46N6O13	CHEMBL387934	C17H33N3O11	1.287
DB00994	Neomycin	C23H46N6O13	CHEMBL2333426	C18H37N5O10	1.27
DB00994	Neomycin	C23H46N6O13	CHEMBL2368628	C18H41Cl4N5O10	1.265
DB00994	Neomycin	C23H46N6O13	CHEMBL1554479	C23H47N5O18S	1.261
DB00994	Neomycin	C23H46N6O13	CHEMBL1516135	C23H47N5O18S	1.261
DB00994	Neomycin	C23H46N6O13	CHEMBL598581	C18H36N4O9	1.247
DB00994	Neomycin	C23H46N6O13	CHEMBL223520	C18H36N4O11	1.24
DB00994	Neomycin	C23H46N6O13	CHEMBL1395097	C23H45N5O14	1.235
DB00994	Neomycin	C23H46N6O13	CHEMBL1182203	C17H33N3O11	1.234
DB00994	Neomycin	C23H46N6O13	CHEMBL1316563	C17H36N4O14S	1.233
DB00994	Neomycin	C23H46N6O13	CHEMBL2368383	C18H40Cl4N4O10	1.232
DB00994	Neomycin	C23H46N6O13	CHEMBL1486384	C18H36N4O11	1.217
DB00994	Neomycin	C23H46N6O13	CHEMBL1487860	C18H36N4O11	1.217
DB00994	Neomycin	C23H46N6O13	CHEMBL1623920	C18H36N4O11	1.217
DB00994	Neomycin	C23H46N6O13	CHEMBL264546	C19H38N4O11	1.205
DB00994	Neomycin	C23H46N6O13	CHEMBL1403353	C18H37N5O9	1.201
DB00994	Neomycin	C23H46N6O13	CHEMBL1314828	C18H37N5O9	1.201
DB00994	Neomycin	C23H46N6O13	CHEMBL1184880	C17H33N3O11	1.197
DB00994	Neomycin	C23H46N6O13	CHEMBL1182228	C17H34N4O10	1.192
DB00994	Neomycin	C23H46N6O13	CHEMBL500813	C23H46N6O13	1.185
DB00994	Neomycin	C23H46N6O13	CHEMBL1331937	C18H37N5O10	1.178
DB00994	Neomycin	C23H46N6O13	CHEMBL2105594	C18H37N5O10	1.173
DB00994	Neomycin	C23H46N6O13	CHEMBL1184867	C17H34N4O10	1.17
DB00994	Neomycin	C23H46N6O13	CHEMBL1741729	C25H50N6O13	1.168
DB00994	Neomycin	C23H46N6O13	CHEMBL118013	C24H48N6O11	1.164
DB00994	Neomycin	C23H46N6O13	CHEMBL1624185	C18H37N5O8	1.151
DB00994	Neomycin	C23H46N6O13	CHEMBL1162918	C21H43N5O11	1.133
DB00994	Neomycin	C23H46N6O13	CHEMBL599188	C18H37N5O7	1.123
DB00994	Neomycin	C23H46N6O13	CHEMBL605966	C17H35N5O7	1.12
DB00994	Neomycin	C23H46N6O13	CHEMBL194346	C18H36N4O10	1.119
DB00994	Neomycin	C23H46N6O13	CHEMBL1950493	C23H50N6O18S	1.114
DB00994	Neomycin	C23H46N6O13	CHEMBL389029	C29H55N5O18	1.111
DB00994	Neomycin	C23H46N6O13	CHEMBL38377	C19H39N5O11	1.111
DB00994	Neomycin	C23H46N6O13	CHEMBL370180	C21H43N5O11	1.093
DB00994	Neomycin	C23H46N6O13	CHEMBL2333428	C18H36N4O8	1.093
DB00994	Neomycin	C23H46N6O13	CHEMBL598583	C18H37N5O7	1.091
DB00994	Neomycin	C23H46N6O13	CHEMBL2220021	C18H36N4O10	1.088
DB00994	Neomycin	C23H46N6O13	CHEMBL228160	C25H50N6O14	1.591
DB00994	Neomycin	C23H46N6O13	CHEMBL2303743	C18H36N4O10	1.077
DB00994	Neomycin	C23H46N6O13	CHEMBL194912	C24H50N6O12	1.07
DB00994	Neomycin	C23H46N6O13	CHEMBL196111	C21H44N6O10	1.062
DB00994	Neomycin	C23H46N6O13	CHEMBL2206190	C18H38N4O14S	1.061
DB00994	Neomycin	C23H46N6O13	CHEMBL2096826	C21H44N6O10	1.056
DB00994	Neomycin	C23H46N6O13	CHEMBL2096733	C21H44N6O10	1.056
DB00994	Neomycin	C23H46N6O13	CHEMBL1199292	C30H60N6O13	1.051
DB00994	Neomycin	C23H46N6O13	CHEMBL2220322	C18H36N4O10	1.044
DB00994	Neomycin	C23H46N6O13	CHEMBL2220023	C18H36N4O10	1.044
DB00994	Neomycin	C23H46N6O13	CHEMBL2220482	C19H38N4O10	1.042
DB00994	Neomycin	C23H46N6O13	CHEMBL3039857	C19H38N4O12	1.5
DB00994	Neomycin	C23H46N6O13	CHEMBL2220350	C19H38N4O10	1.042
DB00994	Neomycin	C23H46N6O13	CHEMBL2206191	C18H38N4O14S	1.034
DB00994	Neomycin	C23H46N6O13	CHEMBL122030	C19H40N6O7	1.03
DB00994	Neomycin	C23H46N6O13	CHEMBL2303624	C18H36N4O11	1.027
DB00994	Neomycin	C23H46N6O13	CHEMBL197693	C17H34N4O10	1.025
DB00994	Neomycin	C23H46N6O13	CHEMBL240104	C18H37N5O9	1.023
DB00994	Neomycin	C23H46N6O13	CHEMBL2206188	C18H38N4O14S	1.021
DB00994	Neomycin	C23H46N6O13	CHEMBL372517	C21H43N5O10	1.019
DB00994	Neomycin	C23H46N6O13	CHEMBL373500	C17H34N4O10.H2O4S	1.012
DB00994	Neomycin	C23H46N6O13	CHEMBL372626	C18H37N5O9	1.009
DB00994	Neomycin	C23H46N6O13	CHEMBL3040332	C18H36N4O11	1.494
DB00994	Neomycin	C23H46N6O13	CHEMBL1159782	C19H39N5O9	1.005
DB00994	Neomycin	C23H46N6O13	CHEMBL288690	C18H38N6O9	1.004
DB00994	Neomycin	C23H46N6O13	CHEMBL2333425	C18H38N6O9	1.414
DB01000	Cyclacillin	C15H23N3O4S	CHEMBL1370312	C15H23N3O4S	4.959
DB01000	Cyclacillin	C15H23N3O4S	CHEMBL2107667	C19H27N3O4S	2.124
DB01000	Cyclacillin	C15H23N3O4S	CHEMBL2023705	C14H21N3O6S	1.634
DB01000	Cyclacillin	C15H23N3O4S	CHEMBL42268	C14H20N2O6S	1.536
DB01000	Cyclacillin	C15H23N3O4S	CHEMBL2448937	C14H21N3O4S	1.023
DB01015	Sulfamethoxazole	C10H11N3O3S	CHEMBL1972802	C10H11N3O4S	1.585
DB01015	Sulfamethoxazole	C10H11N3O3S	CHEMBL608998	C10H10N2O3S	1.499
DB01015	Sulfamethoxazole	C10H11N3O3S	CHEMBL610753	C10H9N3O5S	1.349
DB01017	Minocycline	C23H27N3O7	CHEMBL1783299	C31H36N4O7	1.982
DB01017	Minocycline	C23H27N3O7	CHEMBL1782479	C31H38N4O8	1.956
DB01017	Minocycline	C23H27N3O7	CHEMBL1782480	C30H36N4O7	1.949
DB01017	Minocycline	C23H27N3O7	CHEMBL1782481	C32H38N4O7	1.949
DB01017	Minocycline	C23H27N3O7	CHEMBL2104756	C21H23N3O7	1.937
DB01017	Minocycline	C23H27N3O7	CHEMBL1782490	C26H27N3O7	1.92
DB01017	Minocycline	C23H27N3O7	CHEMBL1783298	C30H34N4O7	1.727
DB01017	Minocycline	C23H27N3O7	CHEMBL1783300	C32H38N4O7	1.713
DB01017	Minocycline	C23H27N3O7	CHEMBL1783655	C35H44N4O7	1.601
DB01017	Minocycline	C23H27N3O7	CHEMBL2107132	C21H21N3O9	1.374
DB01017	Minocycline	C23H27N3O7	CHEMBL236463	C23H28N4O7	2.322
DB01017	Minocycline	C23H27N3O7	CHEMBL1782491	C27H29N3O7	2.214
DB01017	Minocycline	C23H27N3O7	CHEMBL1783197	C27H29N3O7	2.2
DB01017	Minocycline	C23H27N3O7	CHEMBL1689772	C29H40N4O7	2.154
DB01017	Minocycline	C23H27N3O7	CHEMBL1515060	C23H27N3O7	2.137
DB01017	Minocycline	C23H27N3O7	CHEMBL1782478	C29H34N4O7	2.124
DB01017	Minocycline	C23H27N3O7	CHEMBL1399028	C23H28ClN3O7	2.062
DB01017	Minocycline	C23H27N3O7	CHEMBL1782485	C27H28FN3O7	2.014
DB01026	Ketoconazole	C26H28Cl2N4O4	CHEMBL295698	C26H28Cl2N4O4	1.329
DB01026	Ketoconazole	C26H28Cl2N4O4	CHEMBL319160	C26H28Cl2N4O4	1.329
DB01026	Ketoconazole	C26H28Cl2N4O4	CHEMBL372799	C24H26Cl2N4O3	1.166
DB01026	Ketoconazole	C26H28Cl2N4O4	CHEMBL328863	C26H28Cl2N4O4	1.058
DB01026	Ketoconazole	C26H28Cl2N4O4	CHEMBL75	C26H28Cl2N4O4	1.029
DB01044	Gatifloxacin	C19H22FN3O4	CHEMBL142913	C19H22FN3O4	1.918
DB01044	Gatifloxacin	C19H22FN3O4	CHEMBL331987	C21H26FN3O4	1.902
DB01044	Gatifloxacin	C19H22FN3O4	CHEMBL1818724	C19H22FN3O5	1.862
DB01044	Gatifloxacin	C19H22FN3O4	CHEMBL2110804	C19H20F3N3O4	1.846
DB01044	Gatifloxacin	C19H22FN3O4	CHEMBL1576581	C21H25FN4O4S	1.835
DB01044	Gatifloxacin	C19H22FN3O4	CHEMBL2326947	C21H27ClFN3O5	1.829
DB01044	Gatifloxacin	C19H22FN3O4	CHEMBL1818704	C21H23FN4O4	1.825
DB01044	Gatifloxacin	C19H22FN3O4	CHEMBL2106116	C19H21ClF3N3O4	1.755
DB01044	Gatifloxacin	C19H22FN3O4	CHEMBL1818712	C23H29FN4O5	1.751
DB01044	Gatifloxacin	C19H22FN3O4	CHEMBL251670	C19H22FN3O4	2.198
DB01044	Gatifloxacin	C19H22FN3O4	CHEMBL2338467	C19H20FN3O6	1.703
DB01044	Gatifloxacin	C19H22FN3O4	CHEMBL250534	C24H34FN3O4	1.693
DB01044	Gatifloxacin	C19H22FN3O4	CHEMBL1818710	C22H26FN3O5	1.676
DB01044	Gatifloxacin	C19H22FN3O4	CHEMBL1818711	C23H28FN3O5	1.66
DB01044	Gatifloxacin	C19H22FN3O4	CHEMBL250331	C24H34FN3O4	1.647
DB01044	Gatifloxacin	C19H22FN3O4	CHEMBL408189	C25H26FN3O4	1.642
DB01044	Gatifloxacin	C19H22FN3O4	CHEMBL250735	C22H30FN3O4	1.641
DB01044	Gatifloxacin	C19H22FN3O4	CHEMBL250535	C26H38FN3O4	1.625
DB01044	Gatifloxacin	C19H22FN3O4	CHEMBL1818705	C22H25FN4O4	1.625
DB01044	Gatifloxacin	C19H22FN3O4	CHEMBL1818706	C22H26FN3O6	1.615
DB01044	Gatifloxacin	C19H22FN3O4	CHEMBL1212948	C20H24FN3O4	2.075
DB01044	Gatifloxacin	C19H22FN3O4	CHEMBL1818707	C23H28FN3O6	1.603
DB01044	Gatifloxacin	C19H22FN3O4	CHEMBL1210954	C20H24FN3O4	1.591
DB01044	Gatifloxacin	C19H22FN3O4	CHEMBL403567	C28H42FN3O4	1.576
DB01044	Gatifloxacin	C19H22FN3O4	CHEMBL2338469	C21H24FN3O6	1.564
DB01044	Gatifloxacin	C19H22FN3O4	CHEMBL1818708	C23H28FN3O6	1.562
DB01044	Gatifloxacin	C19H22FN3O4	CHEMBL1818719	C23H29FN4O5	1.555
DB01044	Gatifloxacin	C19H22FN3O4	CHEMBL1818709	C24H30FN3O6	1.552
DB01044	Gatifloxacin	C19H22FN3O4	CHEMBL1818718	C22H27FN4O5	1.541
DB01044	Gatifloxacin	C19H22FN3O4	CHEMBL250536	C30H46FN3O4	1.521
DB01044	Gatifloxacin	C19H22FN3O4	CHEMBL1834124	C26H24FN3O4	1.453
DB01044	Gatifloxacin	C19H22FN3O4	CHEMBL123246	C19H22FN3O4	2.005
DB01044	Gatifloxacin	C19H22FN3O4	CHEMBL15426	C20H24FN3O4	1.304
DB01044	Gatifloxacin	C19H22FN3O4	CHEMBL14937	C18H20FN3O4	1.302
DB01044	Gatifloxacin	C19H22FN3O4	CHEMBL15521	C20H25FN4O4	1.267
DB01044	Gatifloxacin	C19H22FN3O4	CHEMBL275216	C19H22FN3O4	1.26
DB01044	Gatifloxacin	C19H22FN3O4	CHEMBL275359	C18H20FN3O4	1.259
DB01044	Gatifloxacin	C19H22FN3O4	CHEMBL15129	C19H22FN3O4	1.255
DB01044	Gatifloxacin	C19H22FN3O4	CHEMBL15372	C20H24FN3O4	1.254
DB01044	Gatifloxacin	C19H22FN3O4	CHEMBL15465	C17H20FN3O4	1.229
DB01044	Gatifloxacin	C19H22FN3O4	CHEMBL102442	C18H18F3N3O4	1.218
DB01044	Gatifloxacin	C19H22FN3O4	CHEMBL106279	C19H20F3N3O4	1.184
DB01044	Gatifloxacin	C19H22FN3O4	CHEMBL141514	C18H20FN3O4	1.995
DB01044	Gatifloxacin	C19H22FN3O4	CHEMBL104989	C24H22F3N3O4	1.132
DB01044	Gatifloxacin	C19H22FN3O4	CHEMBL335783	C18H20FN3O4	1.995
DB01044	Gatifloxacin	C19H22FN3O4	CHEMBL142286	C18H19FN2O4	1.99
DB01044	Gatifloxacin	C19H22FN3O4	CHEMBL428581	C19H22FN3O4	1.924
DB01044	Gatifloxacin	C19H22FN3O4	CHEMBL222658	C20H24FN3O4	1.921
DB01051	Novobiocin	C31H36N2O11	CHEMBL1834263	C36H45N3O14S	1.726
DB01051	Novobiocin	C31H36N2O11	CHEMBL1097292	C31H36N2O11	1.719
DB01051	Novobiocin	C31H36N2O11	CHEMBL1834459	C38H49N3O12	1.703
DB01051	Novobiocin	C31H36N2O11	CHEMBL1834458	C40H45N3O12	1.698
DB01051	Novobiocin	C31H36N2O11	CHEMBL1619419	C31H36N2O11	1.289
DB01051	Novobiocin	C31H36N2O11	CHEMBL1625763	C31H36N2O11	1.289
DB01051	Novobiocin	C31H36N2O11	CHEMBL1797186	C31H36N2O10	1.286
DB01051	Novobiocin	C31H36N2O11	CHEMBL2420692	C32H39NO10	1.259
DB01051	Novobiocin	C31H36N2O11	CHEMBL35025	C31H36N2O11	1.255
DB01051	Novobiocin	C31H36N2O11	CHEMBL2420691	C33H40N2O11	1.244
DB01051	Novobiocin	C31H36N2O11	CHEMBL1097291	C31H36N2O12	2.019
DB01051	Novobiocin	C31H36N2O11	CHEMBL1773231	C30H35NO9	1.241
DB01051	Novobiocin	C31H36N2O11	CHEMBL1834270	C36H47N3O11	1.89
DB01051	Novobiocin	C31H36N2O11	CHEMBL1834269	C37H48N4O12	1.824
DB01051	Novobiocin	C31H36N2O11	CHEMBL1834273	C36H45N3O11	1.813
DB01051	Novobiocin	C31H36N2O11	CHEMBL1834265	C37H45N3O14	1.769
DB01051	Novobiocin	C31H36N2O11	CHEMBL1834271	C41H57N5O11	1.753
DB01051	Novobiocin	C31H36N2O11	CHEMBL1834264	C37H46N4O13	1.747
DB01051	Novobiocin	C31H36N2O11	CHEMBL1834268	C39H52N4O12	1.735
DB01051	Novobiocin	C31H36N2O11	CHEMBL1834460	C38H47N3O14	1.729
DB01053	Benzylpenicillin	C16H18N2O4S	CHEMBL1214	C17H18N2O6S	3.18
DB01053	Benzylpenicillin	C16H18N2O4S	CHEMBL84080	C16H18N2O4S	3.028
DB01053	Benzylpenicillin	C16H18N2O4S	CHEMBL312755	C16H18N2O4S	3.005
DB01053	Benzylpenicillin	C16H18N2O4S	CHEMBL1473908	C16H19N3O4S	2.631
DB01053	Benzylpenicillin	C16H18N2O4S	CHEMBL2107679	C31H35N3O4S	2.557
DB01053	Benzylpenicillin	C16H18N2O4S	CHEMBL1620938	C17H19N3O4S	2.391
DB01053	Benzylpenicillin	C16H18N2O4S	CHEMBL1367635	C16H19N3O5S	2.361
DB01053	Benzylpenicillin	C16H18N2O4S	CHEMBL1433952	C16H19N3O5S	2.361
DB01053	Benzylpenicillin	C16H18N2O4S	CHEMBL1200651	C32H38N4O4S	2.227
DB01053	Benzylpenicillin	C16H18N2O4S	CHEMBL453388	C16H25N3O7S	5.013
DB01053	Benzylpenicillin	C16H18N2O4S	CHEMBL300052	C16H18N2O4S	4.859
DB01053	Benzylpenicillin	C16H18N2O4S	CHEMBL1619690	C17H19N3O4S	4.219
DB01053	Benzylpenicillin	C16H18N2O4S	CHEMBL1616445	C17H18N2O6S	4.18
DB01053	Benzylpenicillin	C16H18N2O4S	CHEMBL117967	C18H22N2O4S	4.06
DB01053	Benzylpenicillin	C16H18N2O4S	CHEMBL325024	C23H24N2O4S	3.432
DB01053	Benzylpenicillin	C16H18N2O4S	CHEMBL1908324	C17H19N3O4S	3.227
DB01059	Norfloxacin	C16H18FN3O3	CHEMBL574481	C21H24FN3O4	1.604
DB01059	Norfloxacin	C16H18FN3O3	CHEMBL583949	C19H20FN3O5	1.6
DB01059	Norfloxacin	C16H18FN3O3	CHEMBL356614	C24H28FN3O3	1.599
DB01059	Norfloxacin	C16H18FN3O3	CHEMBL320964	C22H21FN4O3	1.598
DB01059	Norfloxacin	C16H18FN3O3	CHEMBL2159994	C24H24FN3O3	1.596
DB01059	Norfloxacin	C16H18FN3O3	CHEMBL267648	C17H20FN3O3	1.595
DB01059	Norfloxacin	C16H18FN3O3	CHEMBL2152314	C22H26FN3O4	1.574
DB01059	Norfloxacin	C16H18FN3O3	CHEMBL414451	C20H24FN3O3	1.572
DB01059	Norfloxacin	C16H18FN3O3	CHEMBL283849	C17H19F2N3O3	1.569
DB01059	Norfloxacin	C16H18FN3O3	CHEMBL1631366	C22H20F3N3O3	1.532
DB01059	Norfloxacin	C16H18FN3O3	CHEMBL538983	C16H18ClF2N3O3	2.085
DB01059	Norfloxacin	C16H18FN3O3	CHEMBL1631368	C22H20F3N3O3	1.518
DB01059	Norfloxacin	C16H18FN3O3	CHEMBL274980	C19H22FN3O3	1.516
DB01059	Norfloxacin	C16H18FN3O3	CHEMBL15361	C18H20FN3O3	1.514
DB01059	Norfloxacin	C16H18FN3O3	CHEMBL435853	C21H24FN3O3	1.511
DB01059	Norfloxacin	C16H18FN3O3	CHEMBL14866	C20H24FN3O3	1.501
DB01059	Norfloxacin	C16H18FN3O3	CHEMBL417530	C19H21F2N3O3	1.5
DB01059	Norfloxacin	C16H18FN3O3	CHEMBL73577	C16H18FN3O2	1.489
DB01059	Norfloxacin	C16H18FN3O3	CHEMBL189394	C21H21FN4O3	1.488
DB01059	Norfloxacin	C16H18FN3O3	CHEMBL2104775	C18H28FN3O8S	1.484
DB01059	Norfloxacin	C16H18FN3O3	CHEMBL15531	C19H22FN3O3	1.476
DB01059	Norfloxacin	C16H18FN3O3	CHEMBL544453	C17H21ClFN3O3	2.083
DB01059	Norfloxacin	C16H18FN3O3	CHEMBL2152310	C23H28FN3O4	1.474
DB01059	Norfloxacin	C16H18FN3O3	CHEMBL574037	C22H26FN3O4	1.469
DB01059	Norfloxacin	C16H18FN3O3	CHEMBL29597	C18H22FN3O4	1.468
DB01059	Norfloxacin	C16H18FN3O3	CHEMBL282095	C17H18FN3O3	1.465
DB01059	Norfloxacin	C16H18FN3O3	CHEMBL1428564	C18H24FN3O6S	1.464
DB01059	Norfloxacin	C16H18FN3O3	CHEMBL497251	C20H27BrFN3O5	1.464
DB01059	Norfloxacin	C16H18FN3O3	CHEMBL284890	C15H16FN3O3	1.463
DB01059	Norfloxacin	C16H18FN3O3	CHEMBL325975	C17H17F2N3O3	1.461
DB01059	Norfloxacin	C16H18FN3O3	CHEMBL35974	C18H20FN3O3	1.461
DB01059	Norfloxacin	C16H18FN3O3	CHEMBL47255	C18H19F2N3O3	1.455
DB01059	Norfloxacin	C16H18FN3O3	CHEMBL156432	C18H18FN3O3	2.08
DB01059	Norfloxacin	C16H18FN3O3	CHEMBL27358	C23H22FN3O4	1.45
DB01059	Norfloxacin	C16H18FN3O3	CHEMBL274050	C17H20FN3O3	1.446
DB01059	Norfloxacin	C16H18FN3O3	CHEMBL15373	C18H20FN3O3	1.441
DB01059	Norfloxacin	C16H18FN3O3	CHEMBL108513	C21H26FN3O6	1.438
DB01059	Norfloxacin	C16H18FN3O3	CHEMBL15353	C18H20FN3O3	1.437
DB01059	Norfloxacin	C16H18FN3O3	CHEMBL15387	C18H22FN3O3	1.435
DB01059	Norfloxacin	C16H18FN3O3	CHEMBL99269	C16H18FN3O4	1.434
DB01059	Norfloxacin	C16H18FN3O3	CHEMBL130064	C18H21FN4O3	1.432
DB01059	Norfloxacin	C16H18FN3O3	CHEMBL128404	C18H23FN4O3	1.432
DB01059	Norfloxacin	C16H18FN3O3	CHEMBL15148	C20H24FN3O3	1.431
DB01059	Norfloxacin	C16H18FN3O3	CHEMBL15815	C17H20FN3O3	2.074
DB01059	Norfloxacin	C16H18FN3O3	CHEMBL1187301	C20H27FN3O5	1.427
DB01059	Norfloxacin	C16H18FN3O3	CHEMBL2152315	C24H22FN3O4	1.424
DB01059	Norfloxacin	C16H18FN3O3	CHEMBL15322	C19H22FN3O3	1.419
DB01059	Norfloxacin	C16H18FN3O3	CHEMBL15524	C16H18FN3O3	1.414
DB01059	Norfloxacin	C16H18FN3O3	CHEMBL116418	C18H19F2N3O3	1.412
DB01059	Norfloxacin	C16H18FN3O3	CHEMBL116788	C18H19F2N3O3	1.412
DB01059	Norfloxacin	C16H18FN3O3	CHEMBL736	C14H16FN3O3	1.411
DB01059	Norfloxacin	C16H18FN3O3	CHEMBL99495	C17H18FN3O4	1.402
DB01059	Norfloxacin	C16H18FN3O3	CHEMBL15467	C18H22FN3O3	1.396
DB01059	Norfloxacin	C16H18FN3O3	CHEMBL160662	C18H18FN3O3	1.391
DB01059	Norfloxacin	C16H18FN3O3	CHEMBL132434	C18H20FN3O3	2.061
DB01059	Norfloxacin	C16H18FN3O3	CHEMBL261939	C18H22FN3O3	1.388
DB01059	Norfloxacin	C16H18FN3O3	CHEMBL15371	C19H24FN3O3	1.383
DB01059	Norfloxacin	C16H18FN3O3	CHEMBL283890	C17H20FN3O3	1.382
DB01059	Norfloxacin	C16H18FN3O3	CHEMBL14971	C18H22FN3O3	1.379
DB01059	Norfloxacin	C16H18FN3O3	CHEMBL15087	C17H18FN3O3	1.378
DB01059	Norfloxacin	C16H18FN3O3	CHEMBL15164	C19H24FN3O3	1.378
DB01059	Norfloxacin	C16H18FN3O3	CHEMBL34586	C17H19F2N3O3	1.377
DB01059	Norfloxacin	C16H18FN3O3	CHEMBL15417	C20H26FN3O3	1.373
DB01059	Norfloxacin	C16H18FN3O3	CHEMBL125840	C19H22FN3O3	1.371
DB01059	Norfloxacin	C16H18FN3O3	CHEMBL282867	C17H19F2N3O3	1.37
DB01059	Norfloxacin	C16H18FN3O3	CHEMBL134542	C17H18FN3O3	2.061
DB01059	Norfloxacin	C16H18FN3O3	CHEMBL1180337	C18H22FN3O3	1.366
DB01059	Norfloxacin	C16H18FN3O3	CHEMBL429961	C18H20FN3O3	1.365
DB01059	Norfloxacin	C16H18FN3O3	CHEMBL15362	C20H24FN3O3	1.363
DB01059	Norfloxacin	C16H18FN3O3	CHEMBL62325	C19H24FN3O4	1.362
DB01059	Norfloxacin	C16H18FN3O3	CHEMBL131375	C18H19FN4O3	1.359
DB01059	Norfloxacin	C16H18FN3O3	CHEMBL26141	C19H22FN3O3	1.355
DB01059	Norfloxacin	C16H18FN3O3	CHEMBL15335	C17H20FN3O3	1.35
DB01059	Norfloxacin	C16H18FN3O3	CHEMBL32672	C18H19F2N3O3	1.347
DB01059	Norfloxacin	C16H18FN3O3	CHEMBL2152312	C23H28FN3O4	1.347
DB01059	Norfloxacin	C16H18FN3O3	CHEMBL35662	C17H20FN3O4	1.344
DB01059	Norfloxacin	C16H18FN3O3	CHEMBL539232	C17H19ClFN3O3	2.06
DB01059	Norfloxacin	C16H18FN3O3	CHEMBL275411	C19H24FN3O3	1.339
DB01059	Norfloxacin	C16H18FN3O3	CHEMBL280036	C18H22FN3O3	1.335
DB01059	Norfloxacin	C16H18FN3O3	CHEMBL29189	C19H22FN3O3	1.331
DB01059	Norfloxacin	C16H18FN3O3	CHEMBL282356	C16H18FN3O4	1.328
DB01059	Norfloxacin	C16H18FN3O3	CHEMBL15350	C20H26FN3O3	1.323
DB01059	Norfloxacin	C16H18FN3O3	CHEMBL2417807	C22H20F2N4O5	1.317
DB01059	Norfloxacin	C16H18FN3O3	CHEMBL739	C18H20FN3O4	1.314
DB01059	Norfloxacin	C16H18FN3O3	CHEMBL67194	C29H34FN5O3	1.305
DB01059	Norfloxacin	C16H18FN3O3	CHEMBL735	C16H16FN3O4	1.304
DB01059	Norfloxacin	C16H18FN3O3	CHEMBL15089	C21H26FN3O3	1.3
DB01059	Norfloxacin	C16H18FN3O3	CHEMBL138366	C19H22FN3O3	2.06
DB01059	Norfloxacin	C16H18FN3O3	CHEMBL276516	C21H26FN3O3	1.291
DB01059	Norfloxacin	C16H18FN3O3	CHEMBL32069	C18H23FN4O3	1.288
DB01059	Norfloxacin	C16H18FN3O3	CHEMBL131360	C21H29FN4O3	1.287
DB01059	Norfloxacin	C16H18FN3O3	CHEMBL27029	C19H23F2N3O3	1.276
DB01059	Norfloxacin	C16H18FN3O3	CHEMBL25916	C19H24FN3O3	1.273
DB01059	Norfloxacin	C16H18FN3O3	CHEMBL62625	C19H22FN3O4	1.27
DB01059	Norfloxacin	C16H18FN3O3	CHEMBL732	C16H18FN3O4	1.268
DB01059	Norfloxacin	C16H18FN3O3	CHEMBL60778	C20H24FN3O4	1.258
DB01059	Norfloxacin	C16H18FN3O3	CHEMBL26023	C20H24FN3O3	1.248
DB01059	Norfloxacin	C16H18FN3O3	CHEMBL347489	C17H18FN3O3	2.048
DB01059	Norfloxacin	C16H18FN3O3	CHEMBL160838	C19H20FN3O3	1.245
DB01059	Norfloxacin	C16H18FN3O3	CHEMBL29479	C23H24FN3O3	1.245
DB01059	Norfloxacin	C16H18FN3O3	CHEMBL26469	C23H25FN4O3	1.234
DB01059	Norfloxacin	C16H18FN3O3	CHEMBL167009	C21H24FN3O4	1.189
DB01059	Norfloxacin	C16H18FN3O3	CHEMBL62316	C22H28FN3O4	1.182
DB01059	Norfloxacin	C16H18FN3O3	CHEMBL291360	C21H26FN3O4	1.179
DB01059	Norfloxacin	C16H18FN3O3	CHEMBL123681	C23H25FN4O3	1.174
DB01059	Norfloxacin	C16H18FN3O3	CHEMBL418129	C20H24FN3O4	1.163
DB01059	Norfloxacin	C16H18FN3O3	CHEMBL29384	C21H20FN3O3	1.134
DB01059	Norfloxacin	C16H18FN3O3	CHEMBL63712	C35H37F2N5O3	1.108
DB01059	Norfloxacin	C16H18FN3O3	CHEMBL131621	C18H20FN3O3	2.045
DB01059	Norfloxacin	C16H18FN3O3	CHEMBL150654	C19H22FN3O3	2.198
DB01059	Norfloxacin	C16H18FN3O3	CHEMBL440158	C18H20FN3O3	2.04
DB01059	Norfloxacin	C16H18FN3O3	CHEMBL15549	C17H17F2N3O3	2.026
DB01059	Norfloxacin	C16H18FN3O3	CHEMBL15613	C18H19F2N3O3	2.02
DB01059	Norfloxacin	C16H18FN3O3	CHEMBL134352	C19H24FN3O3	2.019
DB01059	Norfloxacin	C16H18FN3O3	CHEMBL1406871	C17H19F2N3O3	2.019
DB01059	Norfloxacin	C16H18FN3O3	CHEMBL15438	C19H21F2N3O3	2.017
DB01059	Norfloxacin	C16H18FN3O3	CHEMBL1086529	C15H16FN3O3	2.014
DB01059	Norfloxacin	C16H18FN3O3	CHEMBL2111892	C19H22FN3O3	2.013
DB01059	Norfloxacin	C16H18FN3O3	CHEMBL135525	C18H19F2N3O3	2.011
DB01059	Norfloxacin	C16H18FN3O3	CHEMBL358209	C18H20FN3O3	2.145
DB01059	Norfloxacin	C16H18FN3O3	CHEMBL16052	C18H20FN3O3	2.001
DB01059	Norfloxacin	C16H18FN3O3	CHEMBL277523	C16H17F2N3O3	1.997
DB01059	Norfloxacin	C16H18FN3O3	CHEMBL15973	C18H21F2N3O3	1.984
DB01059	Norfloxacin	C16H18FN3O3	CHEMBL355972	C18H21F2N3O3	1.98
DB01059	Norfloxacin	C16H18FN3O3	CHEMBL131981	C17H18FN3O3	1.971
DB01059	Norfloxacin	C16H18FN3O3	CHEMBL228450	C18H20FN3O3	1.967
DB01059	Norfloxacin	C16H18FN3O3	CHEMBL336758	C16H16FN3O3	1.966
DB01059	Norfloxacin	C16H18FN3O3	CHEMBL134203	C16H18FN3O3	1.965
DB01059	Norfloxacin	C16H18FN3O3	CHEMBL542073	C15H17ClFN3O3	1.961
DB01059	Norfloxacin	C16H18FN3O3	CHEMBL134599	C18H20FN3O3	1.956
DB01059	Norfloxacin	C16H18FN3O3	CHEMBL360952	C17H19FN4O3	2.139
DB01059	Norfloxacin	C16H18FN3O3	CHEMBL121399	C18H19F2N3O3	1.954
DB01059	Norfloxacin	C16H18FN3O3	CHEMBL345559	C18H20FN3O3	1.952
DB01059	Norfloxacin	C16H18FN3O3	CHEMBL155803	C17H18FN3O3	1.919
DB01059	Norfloxacin	C16H18FN3O3	CHEMBL134977	C17H18FN3O3	1.898
DB01059	Norfloxacin	C16H18FN3O3	CHEMBL151030	C19H22FN3O3	1.897
DB01059	Norfloxacin	C16H18FN3O3	CHEMBL6273	C17H18F3N3O3	1.897
DB01059	Norfloxacin	C16H18FN3O3	CHEMBL335306	C16H18FN3O3	1.896
DB01059	Norfloxacin	C16H18FN3O3	CHEMBL1077975	C20H24FN3O6	1.891
DB01059	Norfloxacin	C16H18FN3O3	CHEMBL192813	C16H18FN3O3	1.885
DB01059	Norfloxacin	C16H18FN3O3	CHEMBL15511	C19H22FN3O3	1.88
DB01059	Norfloxacin	C16H18FN3O3	CHEMBL150947	C17H18FN3O3	2.124
DB01059	Norfloxacin	C16H18FN3O3	CHEMBL134762	C17H18FN3O3	1.876
DB01059	Norfloxacin	C16H18FN3O3	CHEMBL132967	C18H22FN3O3	1.876
DB01059	Norfloxacin	C16H18FN3O3	CHEMBL371384	C19H24FN3O3	1.874
DB01059	Norfloxacin	C16H18FN3O3	CHEMBL134336	C18H20FN3O3	1.864
DB01059	Norfloxacin	C16H18FN3O3	CHEMBL156592	C19H20FN3O3	1.856
DB01059	Norfloxacin	C16H18FN3O3	CHEMBL539496	C16H19ClFN3O3	1.854
DB01059	Norfloxacin	C16H18FN3O3	CHEMBL134469	C18H22FN3O3	1.842
DB01059	Norfloxacin	C16H18FN3O3	CHEMBL135001	C19H22FN3O3	1.838
DB01059	Norfloxacin	C16H18FN3O3	CHEMBL358676	C18H20FN3O3	1.838
DB01059	Norfloxacin	C16H18FN3O3	CHEMBL110781	C20H22FN3O3	1.836
DB01059	Norfloxacin	C16H18FN3O3	CHEMBL151512	C19H22FN3O3	2.116
DB01059	Norfloxacin	C16H18FN3O3	CHEMBL349330	C18H20FN3O3	1.836
DB01059	Norfloxacin	C16H18FN3O3	CHEMBL538466	C16H19ClFN3O4	1.833
DB01059	Norfloxacin	C16H18FN3O3	CHEMBL343603	C19H22FN3O3	1.827
DB01059	Norfloxacin	C16H18FN3O3	CHEMBL540258	C19H25ClFN3O3	1.824
DB01059	Norfloxacin	C16H18FN3O3	CHEMBL553296	C18H23ClFN3O3	1.823
DB01059	Norfloxacin	C16H18FN3O3	CHEMBL355987	C22H22FN3O3	1.822
DB01059	Norfloxacin	C16H18FN3O3	CHEMBL42878	C18H23FN2O3	1.822
DB01059	Norfloxacin	C16H18FN3O3	CHEMBL19927	C17H18FN3O3	1.813
DB01059	Norfloxacin	C16H18FN3O3	CHEMBL19760	C17H18FN3O3	1.813
DB01059	Norfloxacin	C16H18FN3O3	CHEMBL150998	C19H24FN3O3	2.11
DB01059	Norfloxacin	C16H18FN3O3	CHEMBL108986	C21H26FN3O3	1.792
DB01059	Norfloxacin	C16H18FN3O3	CHEMBL2323801	C18H20FN3O3	1.792
DB01059	Norfloxacin	C16H18FN3O3	CHEMBL132671	C18H20FN3O3	1.787
DB01059	Norfloxacin	C16H18FN3O3	CHEMBL160405	C20H22FN3O3	1.779
DB01059	Norfloxacin	C16H18FN3O3	CHEMBL1180570	C20H25FN3O3	1.778
DB01059	Norfloxacin	C16H18FN3O3	CHEMBL155792	C19H22FN3O3	1.774
DB01059	Norfloxacin	C16H18FN3O3	CHEMBL109132	C20H22FN3O3	1.773
DB01059	Norfloxacin	C16H18FN3O3	CHEMBL253567	C19H24FN3O3	1.771
DB01059	Norfloxacin	C16H18FN3O3	CHEMBL740	C17H18FN3O4	1.757
DB01059	Norfloxacin	C16H18FN3O3	CHEMBL334799	C19H22FN3O3	1.752
DB01059	Norfloxacin	C16H18FN3O3	CHEMBL16124	C17H19FN4O3	2.107
DB01059	Norfloxacin	C16H18FN3O3	CHEMBL157744	C20H22FN3O3	1.739
DB01059	Norfloxacin	C16H18FN3O3	CHEMBL1532831	C19H22FN3O4	1.733
DB01059	Norfloxacin	C16H18FN3O3	CHEMBL2417809	C18H19ClFN3O4	1.726
DB01059	Norfloxacin	C16H18FN3O3	CHEMBL351539	C19H22FN3O3	1.714
DB01059	Norfloxacin	C16H18FN3O3	CHEMBL497252	C21H26FN3O3	1.714
DB01059	Norfloxacin	C16H18FN3O3	CHEMBL1834405	C18H18FN3O4	1.712
DB01059	Norfloxacin	C16H18FN3O3	CHEMBL73691	C17H18FN3O2	1.709
DB01059	Norfloxacin	C16H18FN3O3	CHEMBL573543	C19H20FN3O4	1.696
DB01059	Norfloxacin	C16H18FN3O3	CHEMBL1761237	C18H21F2N3O3	1.68
DB01059	Norfloxacin	C16H18FN3O3	CHEMBL573348	C20H22FN3O4	1.678
DB01059	Norfloxacin	C16H18FN3O3	CHEMBL15393	C16H19FN4O3	2.106
DB01059	Norfloxacin	C16H18FN3O3	CHEMBL544927	C21H27ClFN3O3	1.67
DB01059	Norfloxacin	C16H18FN3O3	CHEMBL1359926	C21H28FN3O3	1.643
DB01059	Norfloxacin	C16H18FN3O3	CHEMBL132141	C20H25FIN3O3	1.627
DB01059	Norfloxacin	C16H18FN3O3	CHEMBL157548	C19H20FN3O3	1.624
DB01059	Norfloxacin	C16H18FN3O3	CHEMBL2417808	C22H22F2N4O3	1.619
DB01059	Norfloxacin	C16H18FN3O3	CHEMBL28519	C16H17F2N3O3	1.612
DB01059	Norfloxacin	C16H18FN3O3	CHEMBL309888	C17H20FN3O2	1.611
DB01059	Norfloxacin	C16H18FN3O3	CHEMBL1631371	C22H21F2N3O3	1.608
DB01059	Norfloxacin	C16H18FN3O3	CHEMBL29237	C17H20FN3O3	1.606
DB01059	Norfloxacin	C16H18FN3O3	CHEMBL276049	C18H21FN4O3	2.101
DB01060	Amoxicillin	C16H19N3O5S	CHEMBL1473908	C16H19N3O4S	2.289
DB01060	Amoxicillin	C16H19N3O5S	CHEMBL1367635	C16H19N3O5S	2.169
DB01060	Amoxicillin	C16H19N3O5S	CHEMBL1433952	C16H19N3O5S	2.169
DB01060	Amoxicillin	C16H19N3O5S	CHEMBL1620938	C17H19N3O4S	2.115
DB01060	Amoxicillin	C16H19N3O5S	CHEMBL1200651	C32H38N4O4S	2.113
DB01060	Amoxicillin	C16H19N3O5S	CHEMBL453388	C16H25N3O7S	4.188
DB01060	Amoxicillin	C16H19N3O5S	CHEMBL300052	C16H18N2O4S	4.067
DB01060	Amoxicillin	C16H19N3O5S	CHEMBL1436257	C16H18N2O4S	4.067
DB01060	Amoxicillin	C16H19N3O5S	CHEMBL1619690	C17H19N3O4S	3.664
DB01060	Amoxicillin	C16H19N3O5S	CHEMBL1908324	C17H19N3O4S	3.017
DB01060	Amoxicillin	C16H19N3O5S	CHEMBL312755	C16H18N2O4S	2.918
DB01060	Amoxicillin	C16H19N3O5S	CHEMBL84080	C16H18N2O4S	2.79
DB01060	Amoxicillin	C16H19N3O5S	CHEMBL2107679	C31H35N3O4S	2.373
DB01061	Azlocillin	C20H23N5O6S	CHEMBL2365679	C23H27N5O7S	1.428
DB01061	Azlocillin	C20H23N5O6S	CHEMBL1742952	C23H27N5O7S	1.428
DB01061	Azlocillin	C20H23N5O6S	CHEMBL1616077	C20H23N5O6S	4.288
DB01061	Azlocillin	C20H23N5O6S	CHEMBL209761	C23H27N5O7S	3.459
DB01061	Azlocillin	C20H23N5O6S	CHEMBL1201116	C19H23N3O4S	2.343
DB01061	Azlocillin	C20H23N5O6S	CHEMBL417013	C20H23N5O6S	2.239
DB01061	Azlocillin	C20H23N5O6S	CHEMBL1625673	C19H23N3O4S	2.158
DB01061	Azlocillin	C20H23N5O6S	CHEMBL1616926	C23H27N5O7S	2.052
DB01061	Azlocillin	C20H23N5O6S	CHEMBL1624152	C20H23N5O6S	2.04
DB01066	Cefditoren	C19H18N6O5S3	CHEMBL454446	C25H28N6O7S3	1.576
DB01066	Cefditoren	C19H18N6O5S3	CHEMBL1514735	C25H28N6O7S3	1.537
DB01110	Miconazole	C18H14Cl4N2O	CHEMBL2110698	C18H15Cl3N2O	1.601
DB01110	Miconazole	C18H14Cl4N2O	CHEMBL1201049	C18H16Cl3N3O4	1.536
DB01110	Miconazole	C18H14Cl4N2O	CHEMBL356918	C14H14Cl2N2O	1.215
DB01110	Miconazole	C18H14Cl4N2O	CHEMBL1359713	C14H14Cl2N2O	1.107
DB01110	Miconazole	C18H14Cl4N2O	CHEMBL2111126	C26H23Cl4N2O	1.147
DB01112	Cefuroxime	C16H16N4O8S	CHEMBL1620018	C16H16N4O8S	1.624
DB01112	Cefuroxime	C16H16N4O8S	CHEMBL466	C16H16N4O8S	1.566
DB01112	Cefuroxime	C16H16N4O8S	CHEMBL1620506	C16H16N4O8S	1.559
DB01112	Cefuroxime	C16H16N4O8S	CHEMBL2104152	C17H17N3O8S	1.528
DB01137	Levofloxacin	C18H20FN3O4	CHEMBL283798	C16H16FN3O4	2.342
DB01137	Levofloxacin	C18H20FN3O4	CHEMBL430148	C17H18FN3O4	2.318
DB01137	Levofloxacin	C18H20FN3O4	CHEMBL2079660	C17H18FN3O4	2.318
DB01137	Levofloxacin	C18H20FN3O4	CHEMBL2079661	C17H18FN3O4	2.246
DB01137	Levofloxacin	C18H20FN3O4	CHEMBL19561	C17H18FN3O4	2.225
DB01137	Levofloxacin	C18H20FN3O4	CHEMBL19722	C18H20FN3O4	2.223
DB01137	Levofloxacin	C18H20FN3O4	CHEMBL320517	C20H22FN3O4	2.184
DB01137	Levofloxacin	C18H20FN3O4	CHEMBL108828	C20H22FN3O4	2.183
DB01137	Levofloxacin	C18H20FN3O4	CHEMBL420937	C18H20FN3O4	2.151
DB01137	Levofloxacin	C18H20FN3O4	CHEMBL556371	C18H21ClFN3O4	2.103
DB01137	Levofloxacin	C18H20FN3O4	CHEMBL1688950	C18H20FN3O4	2.016
DB01137	Levofloxacin	C18H20FN3O4	CHEMBL1459	C17H18FN3O4	2.012
DB01137	Levofloxacin	C18H20FN3O4	CHEMBL1688949	C19H22FN3O4	1.929
DB01137	Levofloxacin	C18H20FN3O4	CHEMBL167403	C17H18FN3O4	1.86
DB01137	Levofloxacin	C18H20FN3O4	CHEMBL966	C17H18FN3O4	1.852
DB01137	Levofloxacin	C18H20FN3O4	CHEMBL61160	C18H18FN3O4	1.84
DB01137	Levofloxacin	C18H20FN3O4	CHEMBL397968	C25H24FN3O5	1.68
DB01137	Levofloxacin	C18H20FN3O4	CHEMBL397969	C25H23F2N3O5	1.609
DB01137	Levofloxacin	C18H20FN3O4	CHEMBL243242	C26H26FN3O5	1.6
DB01137	Levofloxacin	C18H20FN3O4	CHEMBL243689	C25H23BrFN3O5	1.594
DB01137	Levofloxacin	C18H20FN3O4	CHEMBL47311	C19H20FN3O4	2.551
DB01137	Levofloxacin	C18H20FN3O4	CHEMBL243241	C26H26FN3O6	1.592
DB01137	Levofloxacin	C18H20FN3O4	CHEMBL104078	C22H21FN4O4	1.515
DB01137	Levofloxacin	C18H20FN3O4	CHEMBL323328	C22H20F2N4O4	1.433
DB01137	Levofloxacin	C18H20FN3O4	CHEMBL146339	C18H21FN4O4	2.534
DB01137	Levofloxacin	C18H20FN3O4	CHEMBL1215660	C17H19FN4O4	2.468
DB01137	Levofloxacin	C18H20FN3O4	CHEMBL1215659	C17H19FN4O4	2.467
DB01137	Levofloxacin	C18H20FN3O4	CHEMBL309434	C18H21N3O4	2.459
DB01137	Levofloxacin	C18H20FN3O4	CHEMBL282940	C18H20FN3O4	2.429
DB01137	Levofloxacin	C18H20FN3O4	CHEMBL277876	C19H22FN3O4	2.423
DB01137	Levofloxacin	C18H20FN3O4	CHEMBL416367	C17H18FN3O4	2.363
DB01139	Cefapirin	C17H17N3O6S2	CHEMBL1161453	C17H17N3O6S2	1.863
DB01139	Cefapirin	C17H17N3O6S2	CHEMBL1617862	C17H17N3O6S2	1.352
DB01139	Cefapirin	C17H17N3O6S2	CHEMBL2105811	C33H37N5O6S2	1.109
DB01140	Cefadroxil	C16H17N3O5S	CHEMBL1200366	C16H20ClN3O5S	1.909
DB01140	Cefadroxil	C16H17N3O5S	CHEMBL1907801	C20H19N3O4S	1.736
DB01140	Cefadroxil	C16H17N3O5S	CHEMBL115860	C16H16N2O4S	1.714
DB01140	Cefadroxil	C16H17N3O5S	CHEMBL1907803	C20H18ClN3O4S	1.652
DB01140	Cefadroxil	C16H17N3O5S	CHEMBL1907798	C20H18ClN3O4S	1.647
DB01140	Cefadroxil	C16H17N3O5S	CHEMBL1907808	C21H21N3O5S	1.638
DB01140	Cefadroxil	C16H17N3O5S	CHEMBL1907800	C20H18ClN3O4S	1.635
DB01140	Cefadroxil	C16H17N3O5S	CHEMBL1907805	C20H19N3O4S	1.617
DB01140	Cefadroxil	C16H17N3O5S	CHEMBL1520246	C16H17N3O5S	1.45
DB01140	Cefadroxil	C16H17N3O5S	CHEMBL6634	C16H17N3O4S	1.419
DB01140	Cefadroxil	C16H17N3O5S	CHEMBL1496979	C16H17N3O4S	1.283
DB01140	Cefadroxil	C16H17N3O5S	CHEMBL1318280	C16H19N3O5S	1.283
DB01140	Cefadroxil	C16H17N3O5S	CHEMBL44601	C16H18N4O4S	1.217
DB01140	Cefadroxil	C16H17N3O5S	CHEMBL296091	C17H20N4O4S	1.13
DB01140	Cefadroxil	C16H17N3O5S	CHEMBL60601	C15H14N2O4S	1.014
DB01140	Cefadroxil	C16H17N3O5S	CHEMBL1555813	C16H17N3O5S	2.169
DB01140	Cefadroxil	C16H17N3O5S	CHEMBL18540	C17H17N3O5S	2.147
DB01140	Cefadroxil	C16H17N3O5S	CHEMBL276568	C18H19N3O5S	2.058
DB01140	Cefadroxil	C16H17N3O5S	CHEMBL443543	C16H16N2O5S	2.024
DB01140	Cefadroxil	C16H17N3O5S	CHEMBL18825	C18H19N3O5S	2.018
DB01140	Cefadroxil	C16H17N3O5S	CHEMBL31293	C16H16N2O4S	1.97
DB01147	Cloxacillin	C19H18ClN3O5S	CHEMBL1622721	C19H17Cl2N3O5S	2.412
DB01147	Cloxacillin	C19H18ClN3O5S	CHEMBL281317	C19H18ClN3O6S	1.635
DB01147	Cloxacillin	C19H18ClN3O5S	CHEMBL281444	C20H21N3O5S	1.338
DB01147	Cloxacillin	C19H18ClN3O5S	CHEMBL24174	C20H20ClN3O5S	1.258
DB01147	Cloxacillin	C19H18ClN3O5S	CHEMBL26227	C20H19Cl2N3O5S	1.222
DB01147	Cloxacillin	C19H18ClN3O5S	CHEMBL1624192	C19H18ClN3O5S	2.823
DB01147	Cloxacillin	C19H18ClN3O5S	CHEMBL1622855	C19H17ClFN3O5S	2.423
DB01147	Cloxacillin	C19H18ClN3O5S	CHEMBL1398507	C19H17ClFN3O5S	2.423
DB01147	Cloxacillin	C19H18ClN3O5S	CHEMBL222645	C19H17ClFN3O5S	2.423
DB01147	Cloxacillin	C19H18ClN3O5S	CHEMBL1620722	C19H17ClFN3O5S	2.422
DB01147	Cloxacillin	C19H18ClN3O5S	CHEMBL1742950	C19H17ClFN3O5S	2.422
DB01147	Cloxacillin	C19H18ClN3O5S	CHEMBL1616891	C19H17Cl2N3O5S	2.412
DB01150	Cefprozil	C18H19N3O5S	CHEMBL276568	C18H19N3O5S	2.246
DB01150	Cefprozil	C18H19N3O5S	CHEMBL1555813	C16H17N3O5S	2.131
DB01150	Cefprozil	C18H19N3O5S	CHEMBL119341	C18H18N2O4S	2.035
DB01150	Cefprozil	C18H19N3O5S	CHEMBL18540	C17H17N3O5S	2.01
DB01150	Cefprozil	C18H19N3O5S	CHEMBL116951	C17H16N2O4S	1.915
DB01150	Cefprozil	C18H19N3O5S	CHEMBL1509369	C17H16N2O4S	1.913
DB01150	Cefprozil	C18H19N3O5S	CHEMBL1520246	C16H17N3O5S	1.401
DB01155	Gemifloxacin	C18H20FN5O4	CHEMBL2107811	C19H20FN5O4	1.667
DB01155	Gemifloxacin	C18H20FN5O4	CHEMBL31949	C17H17FN4O4	1.657
DB01155	Gemifloxacin	C18H20FN5O4	CHEMBL242873	C21H24FN5O4	1.652
DB01155	Gemifloxacin	C18H20FN5O4	CHEMBL1290687	C20H23FN6O5	1.646
DB01155	Gemifloxacin	C18H20FN5O4	CHEMBL1290569	C19H21FN6O5	1.638
DB01155	Gemifloxacin	C18H20FN5O4	CHEMBL441150	C20H24FN5O4	1.627
DB01155	Gemifloxacin	C18H20FN5O4	CHEMBL1782970	C19H22FN5O4	1.618
DB01155	Gemifloxacin	C18H20FN5O4	CHEMBL70645	C17H18FN5O4	1.592
DB01155	Gemifloxacin	C18H20FN5O4	CHEMBL1222731	C20H24FN5O4	1.589
DB01155	Gemifloxacin	C18H20FN5O4	CHEMBL118940	C24H24FN5O4	1.57
DB01155	Gemifloxacin	C18H20FN5O4	CHEMBL251671	C18H20FN5O4	1.902
DB01155	Gemifloxacin	C18H20FN5O4	CHEMBL72873	C18H20FN5O4	1.555
DB01155	Gemifloxacin	C18H20FN5O4	CHEMBL1782971	C20H24FN5O4	1.555
DB01155	Gemifloxacin	C18H20FN5O4	CHEMBL1290806	C21H25FN6O5	1.544
DB01155	Gemifloxacin	C18H20FN5O4	CHEMBL1290463	C18H19FN6O5	1.495
DB01155	Gemifloxacin	C18H20FN5O4	CHEMBL1290568	C19H21FN6O5	1.46
DB01155	Gemifloxacin	C18H20FN5O4	CHEMBL2079299	C26H28FN5O4	1.415
DB01155	Gemifloxacin	C18H20FN5O4	CHEMBL118438	C21H26FN5O4	1.116
DB01155	Gemifloxacin	C18H20FN5O4	CHEMBL333942	C19H22FN5O4	1.108
DB01155	Gemifloxacin	C18H20FN5O4	CHEMBL333711	C20H24FN5O4	1.108
DB01155	Gemifloxacin	C18H20FN5O4	CHEMBL1926910	C18H18F3N5O4	1.895
DB01155	Gemifloxacin	C18H20FN5O4	CHEMBL116660	C20H24FN5O4	1.062
DB01155	Gemifloxacin	C18H20FN5O4	CHEMBL119951	C19H22FN5O4	1.042
DB01155	Gemifloxacin	C18H20FN5O4	CHEMBL1926912	C19H21F2N5O4	1.884
DB01155	Gemifloxacin	C18H20FN5O4	CHEMBL243958	C18H20FN5O4	1.804
DB01155	Gemifloxacin	C18H20FN5O4	CHEMBL1926907	C18H19F2N5O4	1.756
DB01155	Gemifloxacin	C18H20FN5O4	CHEMBL538717	C19H23ClFN5O4	1.751
DB01155	Gemifloxacin	C18H20FN5O4	CHEMBL537265	C19H23ClFN5O4	1.751
DB01155	Gemifloxacin	C18H20FN5O4	CHEMBL1290688	C20H23FN6O5	1.704
DB01155	Gemifloxacin	C18H20FN5O4	CHEMBL242649	C19H22FN5O4	1.677
DB01163	Amdinocillin	C15H23N3O3S	CHEMBL258646	C15H23N3O3S	3.596
DB01165	Ofloxacin	C18H20FN3O4	CHEMBL283798	C16H16FN3O4	2.342
DB01165	Ofloxacin	C18H20FN3O4	CHEMBL430148	C17H18FN3O4	2.318
DB01165	Ofloxacin	C18H20FN3O4	CHEMBL2079660	C17H18FN3O4	2.318
DB01165	Ofloxacin	C18H20FN3O4	CHEMBL2079661	C17H18FN3O4	2.246
DB01165	Ofloxacin	C18H20FN3O4	CHEMBL19561	C17H18FN3O4	2.225
DB01165	Ofloxacin	C18H20FN3O4	CHEMBL19722	C18H20FN3O4	2.223
DB01165	Ofloxacin	C18H20FN3O4	CHEMBL320517	C20H22FN3O4	2.184
DB01165	Ofloxacin	C18H20FN3O4	CHEMBL108828	C20H22FN3O4	2.183
DB01165	Ofloxacin	C18H20FN3O4	CHEMBL420937	C18H20FN3O4	2.151
DB01165	Ofloxacin	C18H20FN3O4	CHEMBL556371	C18H21ClFN3O4	2.103
DB01165	Ofloxacin	C18H20FN3O4	CHEMBL47311	C19H20FN3O4	2.551
DB01165	Ofloxacin	C18H20FN3O4	CHEMBL1688950	C18H20FN3O4	2.016
DB01165	Ofloxacin	C18H20FN3O4	CHEMBL1459	C17H18FN3O4	2.012
DB01165	Ofloxacin	C18H20FN3O4	CHEMBL1688949	C19H22FN3O4	1.929
DB01165	Ofloxacin	C18H20FN3O4	CHEMBL167403	C17H18FN3O4	1.86
DB01165	Ofloxacin	C18H20FN3O4	CHEMBL966	C17H18FN3O4	1.852
DB01165	Ofloxacin	C18H20FN3O4	CHEMBL61160	C18H18FN3O4	1.84
DB01165	Ofloxacin	C18H20FN3O4	CHEMBL397968	C25H24FN3O5	1.68
DB01165	Ofloxacin	C18H20FN3O4	CHEMBL397969	C25H23F2N3O5	1.609
DB01165	Ofloxacin	C18H20FN3O4	CHEMBL243242	C26H26FN3O5	1.6
DB01165	Ofloxacin	C18H20FN3O4	CHEMBL243689	C25H23BrFN3O5	1.594
DB01165	Ofloxacin	C18H20FN3O4	CHEMBL146339	C18H21FN4O4	2.534
DB01165	Ofloxacin	C18H20FN3O4	CHEMBL243241	C26H26FN3O6	1.592
DB01165	Ofloxacin	C18H20FN3O4	CHEMBL104078	C22H21FN4O4	1.515
DB01165	Ofloxacin	C18H20FN3O4	CHEMBL323328	C22H20F2N4O4	1.433
DB01165	Ofloxacin	C18H20FN3O4	CHEMBL1215660	C17H19FN4O4	2.468
DB01165	Ofloxacin	C18H20FN3O4	CHEMBL1215659	C17H19FN4O4	2.467
DB01165	Ofloxacin	C18H20FN3O4	CHEMBL309434	C18H21N3O4	2.459
DB01165	Ofloxacin	C18H20FN3O4	CHEMBL282940	C18H20FN3O4	2.429
DB01165	Ofloxacin	C18H20FN3O4	CHEMBL277876	C19H22FN3O4	2.423
DB01165	Ofloxacin	C18H20FN3O4	CHEMBL416367	C17H18FN3O4	2.363
DB01167	Itraconazole	C35H38Cl2N8O4	CHEMBL1834592	C37H38Cl2N8O4	1.405
DB01167	Itraconazole	C35H38Cl2N8O4	CHEMBL1834583	C35H38Cl2N8O4	1.387
DB01167	Itraconazole	C35H38Cl2N8O4	CHEMBL1834590	C39H46Cl2N8O4	1.386
DB01167	Itraconazole	C35H38Cl2N8O4	CHEMBL1834598	C37H39Cl2N9O4	1.374
DB01167	Itraconazole	C35H38Cl2N8O4	CHEMBL1834588	C37H40Cl2N8O4	1.371
DB01167	Itraconazole	C35H38Cl2N8O4	CHEMBL1835958	C33H34Cl2N8O4	1.37
DB01167	Itraconazole	C35H38Cl2N8O4	CHEMBL1835959	C34H36Cl2N8O4	1.359
DB01167	Itraconazole	C35H38Cl2N8O4	CHEMBL1834593	C37H41Cl2N11O4	1.347
DB01167	Itraconazole	C35H38Cl2N8O4	CHEMBL1834601	C40H46Cl2N10O4	1.297
DB01167	Itraconazole	C35H38Cl2N8O4	CHEMBL1834591	C43H46Cl2N8O4	1.292
DB01167	Itraconazole	C35H38Cl2N8O4	CHEMBL1834585	C36H40Cl2N8O4	1.463
DB01167	Itraconazole	C35H38Cl2N8O4	CHEMBL1834589	C37H40Cl2N8O4	1.276
DB01167	Itraconazole	C35H38Cl2N8O4	CHEMBL1835956	C31H30Cl2N8O4	1.268
DB01167	Itraconazole	C35H38Cl2N8O4	CHEMBL1835957	C32H32Cl2N8O4	1.262
DB01167	Itraconazole	C35H38Cl2N8O4	CHEMBL1834594	C50H50Cl2N8O6	1.143
DB01167	Itraconazole	C35H38Cl2N8O4	CHEMBL1179670	C46H51Cl2N8O6	1.032
DB01167	Itraconazole	C35H38Cl2N8O4	CHEMBL92815	C46H51Cl2N8O6.Br	1.022
DB01167	Itraconazole	C35H38Cl2N8O4	CHEMBL574469	C34H36Cl2N8O4	1.014
DB01167	Itraconazole	C35H38Cl2N8O4	CHEMBL1834586	C36H40Cl2N8O4	1.44
DB01167	Itraconazole	C35H38Cl2N8O4	CHEMBL1834595	C36H36Cl2N8O4	1.438
DB01167	Itraconazole	C35H38Cl2N8O4	CHEMBL1834587	C36H40Cl2N8O4	1.435
DB01167	Itraconazole	C35H38Cl2N8O4	CHEMBL1834582	C35H38Cl2N8O4	1.421
DB01167	Itraconazole	C35H38Cl2N8O4	CHEMBL1834584	C36H40Cl2N8O4	1.419
DB01167	Itraconazole	C35H38Cl2N8O4	CHEMBL1834596	C37H40Cl2N8O4	1.416
DB01167	Itraconazole	C35H38Cl2N8O4	CHEMBL1834599	C37H40Cl2N8O5	1.415
DB01167	Itraconazole	C35H38Cl2N8O4	CHEMBL1834597	C37H40Cl2N8O4	1.446
DB01167	Itraconazole	C35H38Cl2N8O4	CHEMBL1835951	C35H38Cl2N8O4	1.428
DB01167	Itraconazole	C35H38Cl2N8O4	CHEMBL1835952	C35H38Cl2N8O4	1.428
DB01167	Itraconazole	C35H38Cl2N8O4	CHEMBL1834582	C35H38Cl2N8O4	1.421
DB01167	Itraconazole	C35H38Cl2N8O4	CHEMBL1834584	C36H40Cl2N8O4	1.419
DB01167	Itraconazole	C35H38Cl2N8O4	CHEMBL1834596	C37H40Cl2N8O4	1.416
DB01167	Itraconazole	C35H38Cl2N8O4	CHEMBL1834599	C37H40Cl2N8O5	1.415
DB01167	Itraconazole	C35H38Cl2N8O4	CHEMBL1834592	C37H38Cl2N8O4	1.405
DB01167	Itraconazole	C35H38Cl2N8O4	CHEMBL1834583	C35H38Cl2N8O4	1.387
DB01167	Itraconazole	C35H38Cl2N8O4	CHEMBL1834590	C39H46Cl2N8O4	1.386
DB01167	Itraconazole	C35H38Cl2N8O4	CHEMBL1834598	C37H39Cl2N9O4	1.374
DB01167	Itraconazole	C35H38Cl2N8O4	CHEMBL1834585	C36H40Cl2N8O4	1.463
DB01167	Itraconazole	C35H38Cl2N8O4	CHEMBL1834588	C37H40Cl2N8O4	1.371
DB01167	Itraconazole	C35H38Cl2N8O4	CHEMBL1835958	C33H34Cl2N8O4	1.37
DB01167	Itraconazole	C35H38Cl2N8O4	CHEMBL1835959	C34H36Cl2N8O4	1.359
DB01167	Itraconazole	C35H38Cl2N8O4	CHEMBL1834593	C37H41Cl2N11O4	1.347
DB01167	Itraconazole	C35H38Cl2N8O4	CHEMBL454471	C35H38Cl2N8O4	1.33
DB01167	Itraconazole	C35H38Cl2N8O4	CHEMBL1834601	C40H46Cl2N10O4	1.297
DB01167	Itraconazole	C35H38Cl2N8O4	CHEMBL1834591	C43H46Cl2N8O4	1.292
DB01167	Itraconazole	C35H38Cl2N8O4	CHEMBL1834589	C37H40Cl2N8O4	1.276
DB01167	Itraconazole	C35H38Cl2N8O4	CHEMBL1835956	C31H30Cl2N8O4	1.268
DB01167	Itraconazole	C35H38Cl2N8O4	CHEMBL1835957	C32H32Cl2N8O4	1.262
DB01167	Itraconazole	C35H38Cl2N8O4	CHEMBL1834597	C37H40Cl2N8O4	1.446
DB01167	Itraconazole	C35H38Cl2N8O4	CHEMBL1834594	C50H50Cl2N8O6	1.143
DB01167	Itraconazole	C35H38Cl2N8O4	CHEMBL64391	C35H38Cl2N8O4	1.104
DB01167	Itraconazole	C35H38Cl2N8O4	CHEMBL1179670	C46H51Cl2N8O6	1.032
DB01167	Itraconazole	C35H38Cl2N8O4	CHEMBL92815	C46H51Cl2N8O6.Br	1.022
DB01167	Itraconazole	C35H38Cl2N8O4	CHEMBL574469	C34H36Cl2N8O4	1.014
DB01167	Itraconazole	C35H38Cl2N8O4	CHEMBL1834586	C36H40Cl2N8O4	1.44
DB01167	Itraconazole	C35H38Cl2N8O4	CHEMBL1834595	C36H36Cl2N8O4	1.438
DB01167	Itraconazole	C35H38Cl2N8O4	CHEMBL1834587	C36H40Cl2N8O4	1.435
DB01167	Itraconazole	C35H38Cl2N8O4	CHEMBL1835949	C35H38Cl2N8O4	1.428
DB01167	Itraconazole	C35H38Cl2N8O4	CHEMBL1835953	C35H38Cl2N8O4	1.428
DB01167	Itraconazole	C35H38Cl2N8O4	CHEMBL1835954	C35H38Cl2N8O4	1.428
DB01167	Itraconazole	C35H38Cl2N8O4	CHEMBL1835950	C35H38Cl2N8O4	1.428
DB01190	Clindamycin	C18H33ClN2O5S	CHEMBL260605	C19H35ClN2O6S	1.527
DB01190	Clindamycin	C18H33ClN2O5S	CHEMBL1490142	C18H36Cl2N2O6S	1.527
DB01190	Clindamycin	C18H33ClN2O5S	CHEMBL430711	C17H31ClN2O5S	1.524
DB01190	Clindamycin	C18H33ClN2O5S	CHEMBL409702	C17H29ClN2O5S	1.514
DB01190	Clindamycin	C18H33ClN2O5S	CHEMBL259559	C16H27ClF2N2O5S	1.513
DB01190	Clindamycin	C18H33ClN2O5S	CHEMBL259752	C18H31ClN2O5S	1.503
DB01190	Clindamycin	C18H33ClN2O5S	CHEMBL442467	C18H33ClN2O5S	1.5
DB01190	Clindamycin	C18H33ClN2O5S	CHEMBL409461	C18H33ClN2O5S	1.47
DB01190	Clindamycin	C18H33ClN2O5S	CHEMBL259560	C19H33ClN2O5S	1.467
DB01190	Clindamycin	C18H33ClN2O5S	CHEMBL1237059	C18H33ClN2O5S	2.527
DB01190	Clindamycin	C18H33ClN2O5S	CHEMBL1213338	C21H39ClN2O5S	1.448
DB01190	Clindamycin	C18H33ClN2O5S	CHEMBL1213282	C21H39ClN2O5S	1.448
DB01190	Clindamycin	C18H33ClN2O5S	CHEMBL260606	C19H33ClN2O5S	1.44
DB01190	Clindamycin	C18H33ClN2O5S	CHEMBL410866	C20H35ClN2O5S	1.417
DB01190	Clindamycin	C18H33ClN2O5S	CHEMBL308030	C13H23ClN2O5S	1.362
DB01190	Clindamycin	C18H33ClN2O5S	CHEMBL305520	C17H31ClN2O5S	1.358
DB01190	Clindamycin	C18H33ClN2O5S	CHEMBL72407	C17H31ClN2O5S	1.357
DB01190	Clindamycin	C18H33ClN2O5S	CHEMBL302956	C16H29ClN2O5S	1.33
DB01190	Clindamycin	C18H33ClN2O5S	CHEMBL305665	C16H29ClN2O5S	1.33
DB01190	Clindamycin	C18H33ClN2O5S	CHEMBL308597	C16H29ClN2O5S	1.319
DB01190	Clindamycin	C18H33ClN2O5S	CHEMBL2303635	C19H35ClN2O5S	2.485
DB01190	Clindamycin	C18H33ClN2O5S	CHEMBL431374	C16H29ClN2O5S	1.318
DB01190	Clindamycin	C18H33ClN2O5S	CHEMBL71279	C15H27ClN2O5S	1.316
DB01190	Clindamycin	C18H33ClN2O5S	CHEMBL69672	C15H27ClN2O5S	1.316
DB01190	Clindamycin	C18H33ClN2O5S	CHEMBL70689	C16H29ClN2O5S	1.299
DB01190	Clindamycin	C18H33ClN2O5S	CHEMBL71340	C16H29ClN2O5S	1.299
DB01190	Clindamycin	C18H33ClN2O5S	CHEMBL69846	C17H31ClN2O5S	1.27
DB01190	Clindamycin	C18H33ClN2O5S	CHEMBL304064	C17H31ClN2O5S	1.269
DB01190	Clindamycin	C18H33ClN2O5S	CHEMBL72811	C18H33ClN2O5S	1.25
DB01190	Clindamycin	C18H33ClN2O5S	CHEMBL72736	C18H33ClN2O5S	1.249
DB01190	Clindamycin	C18H33ClN2O5S	CHEMBL2311160	C17H31ClN2O5S	1.236
DB01190	Clindamycin	C18H33ClN2O5S	CHEMBL1621082	C18H33ClN2O5S	2.126
DB01190	Clindamycin	C18H33ClN2O5S	CHEMBL74398	C16H29ClN2O5S	1.231
DB01190	Clindamycin	C18H33ClN2O5S	CHEMBL70673	C16H29ClN2O5S	1.231
DB01190	Clindamycin	C18H33ClN2O5S	CHEMBL70342	C19H35ClN2O6S	1.231
DB01190	Clindamycin	C18H33ClN2O5S	CHEMBL307948	C19H35ClN2O6S	1.23
DB01190	Clindamycin	C18H33ClN2O5S	CHEMBL69992	C19H35ClN2O5S	1.203
DB01190	Clindamycin	C18H33ClN2O5S	CHEMBL74297	C19H35ClN2O5S	1.202
DB01190	Clindamycin	C18H33ClN2O5S	CHEMBL308602	C18H33ClN2O5S	1.199
DB01190	Clindamycin	C18H33ClN2O5S	CHEMBL421110	C18H33ClN2O5S	1.198
DB01190	Clindamycin	C18H33ClN2O5S	CHEMBL70779	C19H35ClN2O5S	1.189
DB01190	Clindamycin	C18H33ClN2O5S	CHEMBL72530	C19H35ClN2O5S	1.188
DB01190	Clindamycin	C18H33ClN2O5S	CHEMBL1452303	C18H34Cl2N2O5S	2.032
DB01190	Clindamycin	C18H33ClN2O5S	CHEMBL309092	C17H29ClN2O5S	1.177
DB01190	Clindamycin	C18H33ClN2O5S	CHEMBL70815	C17H29ClN2O5S	1.177
DB01190	Clindamycin	C18H33ClN2O5S	CHEMBL432141	C21H39ClN2O6S	1.176
DB01190	Clindamycin	C18H33ClN2O5S	CHEMBL2107176	C17H32Cl2N2O5S	1.162
DB01190	Clindamycin	C18H33ClN2O5S	CHEMBL1652611	C17H31ClN2O5S	1.151
DB01190	Clindamycin	C18H33ClN2O5S	CHEMBL71823	C22H41ClN2O5S	1.141
DB01190	Clindamycin	C18H33ClN2O5S	CHEMBL418887	C21H39ClN2O5S	1.138
DB01190	Clindamycin	C18H33ClN2O5S	CHEMBL421306	C21H39ClN2O5S	1.137
DB01190	Clindamycin	C18H33ClN2O5S	CHEMBL73890	C23H43ClN2O5S	1.092
DB01190	Clindamycin	C18H33ClN2O5S	CHEMBL2110945	C19H35ClN2O5S	1.704
DB01190	Clindamycin	C18H33ClN2O5S	CHEMBL2106734	C19H36Cl2N2O5S	1.6
DB01190	Clindamycin	C18H33ClN2O5S	CHEMBL260607	C18H33ClN2O5S	1.565
DB01190	Clindamycin	C18H33ClN2O5S	CHEMBL1590620	C18H33ClN2O5S	1.565
DB01190	Clindamycin	C18H33ClN2O5S	CHEMBL260917	C16H29ClN2O5S	1.533
[truncated: 446 more rows]
